# Supplementary material for: Copper-catalyzed 1,2-Borylacylation of 1,3-Enynes: synthesis of β-Alkynyl ketones
Source: Royal Society of Chemistry journal article supplement (doi:10.1039/d2cc01732f), 2022-01-01
Supplement: d2cc01732f1.pdf [file d2cc01732f1.pdf]

## Supporting Information

### Copper-catalyzed 1,2-Borylacylation of 1,3-Enynes: Synthesis of $\beta$ - Alkynyl Ketones

Xin-Lian Liu,<sup>†</sup> Lin Li,<sup>†</sup> Han-Ze Lin,<sup>†</sup> Jing-Tong Deng,<sup>†</sup> Xiang-Zhi Zhang,<sup>\*,†</sup> and Jin-Bao Peng<sup>\*,†</sup>

<sup>†</sup>School of Biotechnology and Health Sciences, Wuyi University, Jiangmen, Guangdong 529020, People's Republic of China; orcid.org/0000-0002-0568-7740; E-mail: pengjb\_05@126.com

## **Table of Contents**

- 1. General Information**
- 2. Substrates Synthesis**
- 3. Optimization of the Reaction Conditions**
- 4. General Procedure**
- 5. Spectroscopic Data of Products**
- 6. Further Transformations of the Product**
- 7. References**
- 8. Copies of NMR Spectra for Compounds**

# 1. General Information

## Reagents, solvents and analytical methods:

Unless otherwise noted, all reactions were carried out under a nitrogen atmosphere. All reagents were from commercial sources and used as received without further purification. All solvents were dried by standard techniques and distilled prior to use. Column chromatography was performed on silica gel (200-300 meshes) using petroleum ether (bp. 60~90 °C) and ethyl acetate as eluent. <sup>1</sup>H NMR spectra were recorded on a Bruker Avance operating at for <sup>1</sup>H NMR at 500 MHz, <sup>13</sup>C NMR at 126 MHz and <sup>19</sup>F NMR at 471 MHz and spectral data were reported in ppm relative to tetramethylsilane (TMS) as internal standard and CDCl<sub>3</sub> (<sup>1</sup>H NMR δ 7.27, <sup>13</sup>C NMR δ 77.0) as solvent. High-resolution mass spectra (HRMS) is produced by Thermo Fisher Scientific. Its main body is composed of two parts: Thermo Scientific's UltiMate 3000 Series liquid system and Thermo Scientific Q-Exactive combined quadrupole Orbitrap mass spectrometer. All coupling constants (*J*) are reported in Hz. The following abbreviations were used to describe peak splitting patterns when appropriate: s = singlet, d = doublet, dd = double doublet, ddd = double doublet of doublets, t = triplet, dt = double triplet, q = quatriplet, m = multiplet, br = broad.

## 2. Substrate Synthesis

### 2.1 Synthesis of 1,3-enynes derivatives

1,3-enynes **1** were synthesized according to the known method<sup>[S1]</sup> by using alkyne and ketone as the substrates(**1a** – **1o**).

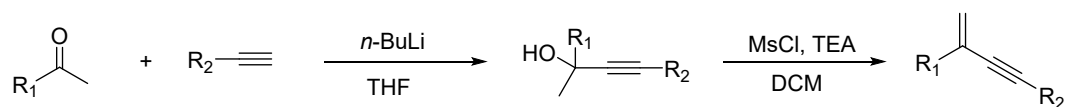

Under nitrogen atmosphere, *n*-BuLi (2.0 M in hexane, 5 mmol, 2.5 mL) was added dropwise to a solution of alkyne (5 mmol) in anhydrous THF (20 mL) at -78 °C. After addition, the resulting solution was stirred at room temperature for one hour. Then, cooled to -78 °C again, ketone (5 mmol) in THF (10 mL) was added dropwise. The reaction mixture was then allowed to warm to room temperature and was monitored by TLC. Once completion the reaction was quenched with saturated aqueous NH<sub>4</sub>Cl and extracted with EtOAc three times. The combined organic layer was dried over Na<sub>2</sub>SO<sub>4</sub> and concentrated under reduced pressure to afford the crude propargyl alcohol.

The resulting propargyl alcohol was dissolved in DCM (30 mL), and the mixture was cooled to 0 °C. TEA (25 mmol, 5 equiv) was added to this solution and methylsulfonyl chloride (12.5 mmol, 2.5 equiv) sequentially. After one hour the reaction was monitored by TLC. Once completion the reaction was quenched with saturated aqueous NH<sub>4</sub>Cl. The aqueous layer was extracted with DCM and the combined organic layers were washed with brine, dried over Na<sub>2</sub>SO<sub>4</sub>, filtered, and concentrated under reduced pressure. The crude material was purified by flash chromatography to yield the 1,3-enyne.

**1a**<sup>[S1]</sup>, **1b**<sup>[S1]</sup>, **1d-1f**<sup>[S1]</sup>, **1h**<sup>[S1]</sup>, **1i**<sup>[S2]</sup>, **1j**<sup>[S3]</sup>, **1k-1n**<sup>[S1]</sup> are known compounds.

2.2 Acid chloride **2a - 2l** were purchased from commercial suppliers and used without further purification.

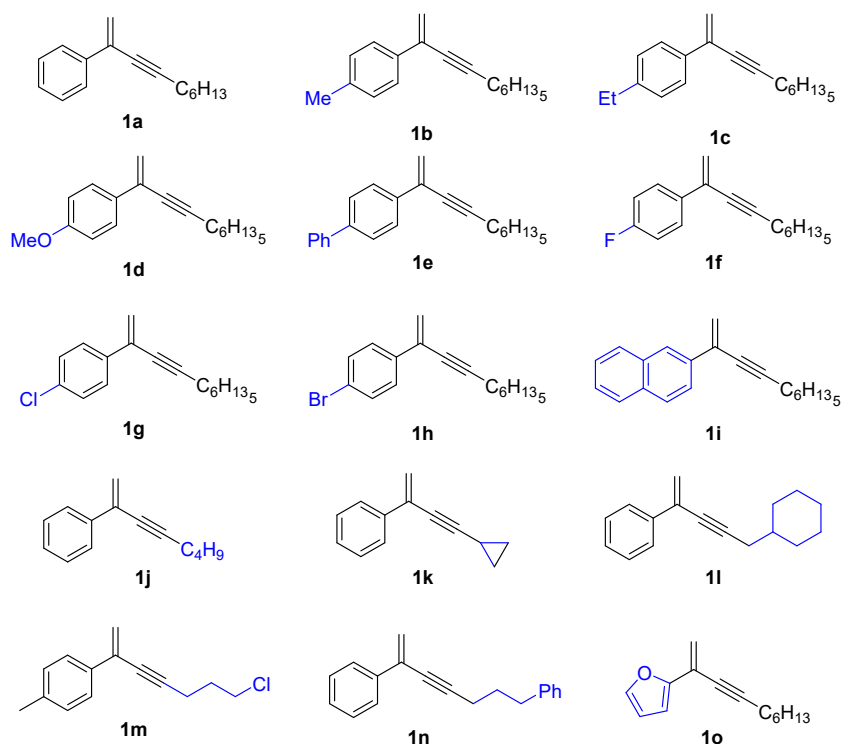

**Figure S1** Substrates of 1,3-enynes derivatives

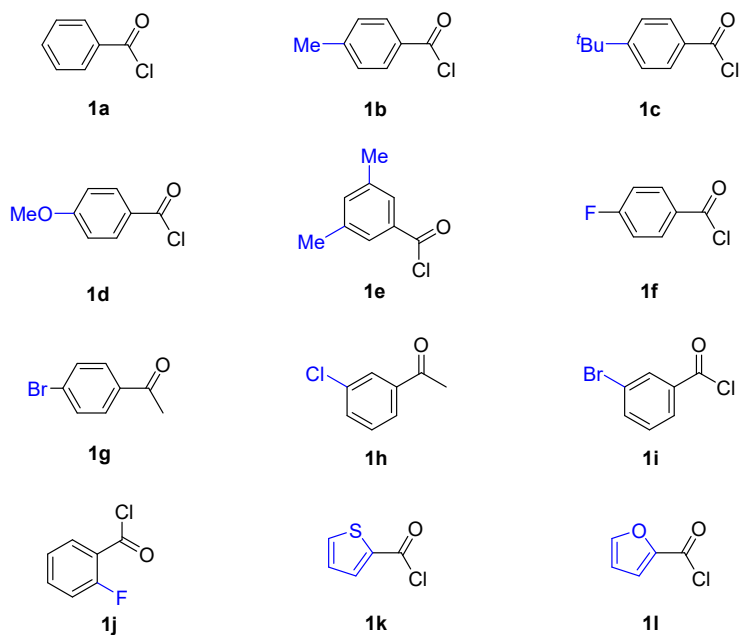

**Figure S2** Substrates of acid chlorides

### 3. Optimization of Reaction Conditions

Table S1. Optimization of the catalyst.<sup>[a]</sup>

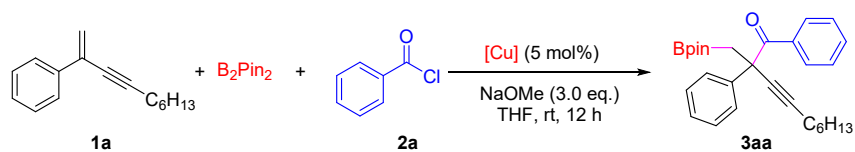

| Entry | Catalyst | Yield (%) <sup>[b]</sup> |
|-------|----------|--------------------------|
| 1     | IPrCuCl  | 15                       |
| 2     | CuTc     | trace                    |
| 3     | CuCl     | trace                    |
| 4     | None     | trace                    |

[a] Reaction conditions: **1a** (0.30 mmol), B<sub>2</sub>Pin<sub>2</sub> (0.45 mmol), **2a** (0.30 mmol), catalyst (5 mol%), NaOMe (3.0 equiv), THF (1 mL), N<sub>2</sub> atmosphere, rt for 10 h. [b] Isolated yield.

Table S2. Optimization of the ratio of B<sub>2</sub>Pin<sub>2</sub> and acid chloride.<sup>[a]</sup>

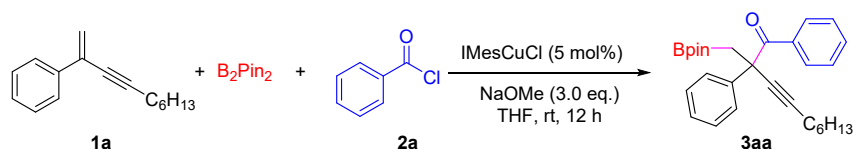

| Entry | B <sub>2</sub> Pin <sub>2</sub> (x mmol) | Acid chloride (x mmol) | Yield (%) <sup>[b]</sup> |
|-------|------------------------------------------|------------------------|--------------------------|
| 1     | 0.24                                     | 0.30                   | 40                       |
| 2     | 0.30                                     | 0.40                   | 55                       |
| 3     | 0.30                                     | 0.24                   | 30                       |
| 4     | 0.40                                     | 0.30                   | 32                       |

[a] Reaction conditions: **1a** (0.30 mmol), B<sub>2</sub>Pin<sub>2</sub> (x mmol), **2a** (x mmol), IMesCuCl (5 mol%), NaOMe (3.0 equiv), THF (1 mL), N<sub>2</sub> atmosphere, rt for 10 h. [b] Isolated yield.

Table S3. Optimization of the solvent.<sup>[a]</sup>

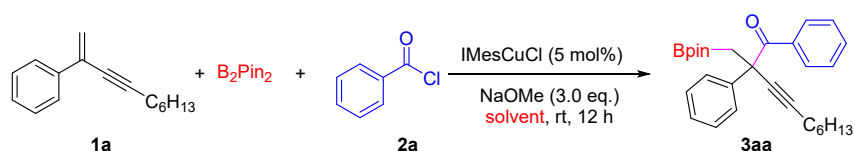

| Entry | Solvent           | Yield (%) <sup>[b]</sup> |
|-------|-------------------|--------------------------|
| 1     | Dioxane           | 23                       |
| 2     | Et <sub>2</sub> O | 14                       |
| 3     | DME               | 25                       |
| 4     | DCM               | 31                       |
| 5     | toluene           | 12                       |
| 6     | MeCN              | trace                    |

[a] Reaction conditions: **1a** (0.30 mmol), B<sub>2</sub>Pin<sub>2</sub> (0.45 mmol), **2a** (0.60 mmol), IMesCuCl (5 mol%), NaOMe (3.0 equiv), solvent (1 mL), N<sub>2</sub> atmosphere, rt for 10 h. [b] Isolated yield.

Table S4. Optimization of the base.<sup>[a]</sup>

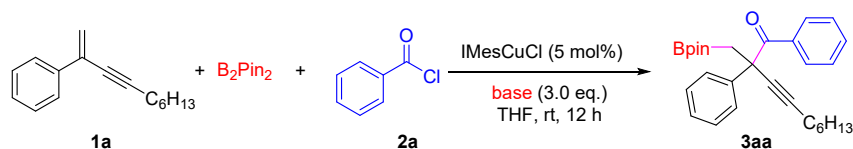

| Entry | Base                            | Yield (%) <sup>[b]</sup> |
|-------|---------------------------------|--------------------------|
| 1     | NaO <sup>t</sup> Bu             | 15                       |
| 2     | KO <sup>t</sup> Bu              | trace                    |
| 3     | Na <sub>2</sub> CO <sub>3</sub> | trace                    |
| 4     | KOMe                            | 30                       |
| 5     | LiOMe                           | trace                    |
| 6     | TEA                             | trace                    |
| 7     | NaOMe                           | 55                       |

[a] Reaction conditions: **1a** (0.30 mmol), B<sub>2</sub>Pin<sub>2</sub> (0.45 mmol), **2a** (0.60 mmol), IMesCuCl (5 mol%), base (3.0 equiv), THF (1 mL), N<sub>2</sub> atmosphere, rt for 10 h. [b] Isolated yield.

Table S5. Optimization of temperature.<sup>[a]</sup>

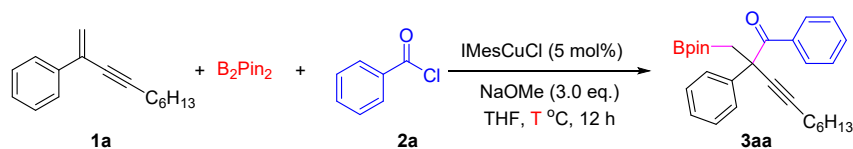

| Entry | Temp. (°C) | Yield (%) <sup>[b]</sup> |
|-------|------------|--------------------------|
| 1     | 0          | 52                       |
| 2     | rt         | 55                       |
| 3     | 50         | 48                       |
| 4     | 70         | trace                    |

[a] Reaction conditions: **1a** (0.30 mmol), B<sub>2</sub>Pin<sub>2</sub> (0.45 mmol), **2a** (0.60 mmol), IMesCuCl (5 mol%), NaOMe (3.0 equiv), THF (1 mL), N<sub>2</sub> atmosphere, T °C for 10 h. [b] Isolated yield.

Table S6. Optimization of ligand.<sup>[a]</sup>

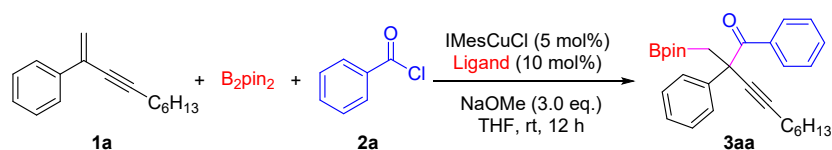

| Entry | Ligand                               | Yield (%) <sup>[b]</sup> |
|-------|--------------------------------------|--------------------------|
| 1     | PPh <sub>3</sub>                     | 60                       |
| 2     | DPEphos                              | 68                       |
| 3     | Xphos                                | 55                       |
| 4     | DPPF                                 | 46                       |
| 5     | DPPB                                 | 48                       |
| 6     | P(4-FPh) <sub>3</sub>                | 78                       |
| 7     | dtbpy                                | 48                       |
| 8     | P(pentafluorophenyl) <sub>3</sub>    | 47                       |
| 9     | P(4-CF <sub>3</sub> Ph) <sub>3</sub> | 73                       |
| 10    | P( <i>o</i> -tolyl) <sub>3</sub>     | 45                       |

[a] Reaction conditions: **1a** (0.30 mmol), B<sub>2</sub>Pin<sub>2</sub> (0.45 mmol), **2a** (0.60 mmol), IMesCuCl (5 mol%), NaOMe (3.0 equiv), ligand (10 mol%), THF (1 mL), N<sub>2</sub> atmosphere, rt for 10 h. [b] Isolated yield.

Table S7. Optimization of additive.<sup>[a]</sup>

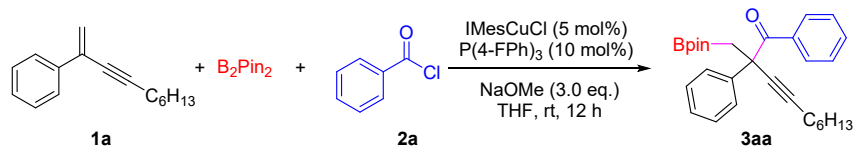

| Entry | Additive              | Yield (%) <sup>[b]</sup> |
|-------|-----------------------|--------------------------|
| 1     | 5Å MS                 | 70                       |
| 2     | 20% CsF               | 60                       |
| 3     | 10% Ac <sub>2</sub> O | 40                       |
| 4     | 2eq H <sub>2</sub> O  | 49                       |

[a] Reaction conditions: **1a** (0.30 mmol), B<sub>2</sub>Pin<sub>2</sub> (0.45 mmol), **2a** (0.60 mmol), IMesCuCl (5 mol%), NaOMe (3.0 equiv), P(4-FPh)<sub>3</sub> (10 mol%), THF (1 mL), N<sub>2</sub> atmosphere, rt for 10 h. [b] Isolated yield.

Table S8. Optimization of the equivalent of NaOMe.<sup>[a]</sup>

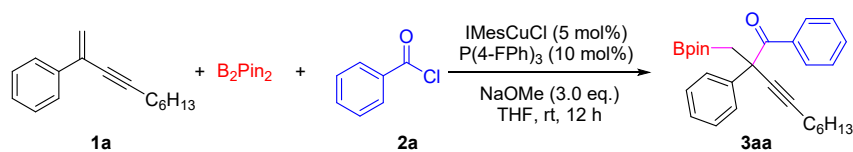

| Entry | NaOMe (x eq.) | Yield (%) <sup>[b]</sup> |
|-------|---------------|--------------------------|
| 1     | 1             | 7                        |
| 2     | 2             | 12                       |
| 3     | 4             | 60                       |

[a] Reaction conditions: **1a** (0.30 mmol), B<sub>2</sub>Pin<sub>2</sub> (0.45 mmol), **2a** (0.60 mmol), IMesCuCl (5 mol%), NaOMe (3.0 equiv), P(4-FPh)<sub>3</sub> (10 mol%), THF (1 mL), N<sub>2</sub> atmosphere, rt for 10 h. [b] Isolated yield.

Table S9. Further optimization of the reaction conditions.<sup>[a]</sup>

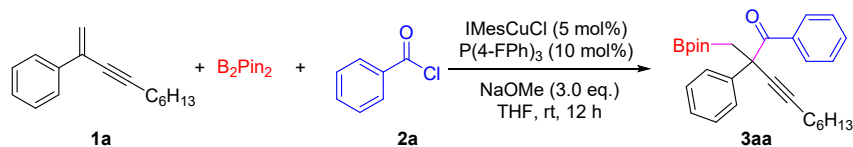

| Entry | deviations from optimized conditions                 | Yield (%) <sup>[b]</sup> |
|-------|------------------------------------------------------|--------------------------|
| 1     | CuCl instead of IMesCuCl                             | 31                       |
| 2     | CuCl <sub>2</sub> instead of IMesCuCl                | 28                       |
| 3     | Cu(OAc) <sub>2</sub> instead of IMesCuCl             | 39                       |
| 4     | <b>2a</b> was added as the final component           | 78                       |
| 5     | Slow addition of <b>2a</b> with a feeding pump (2 h) | 28                       |

[a] Reaction conditions: **1a** (0.30 mmol), B<sub>2</sub>Pin<sub>2</sub> (0.45 mmol), **2a** (0.60 mmol), IMesCuCl (5 mol%), NaOMe (3.0 equiv), P(4-FPh)<sub>3</sub> (10 mol%), THF (1 mL), N<sub>2</sub> atmosphere, rt for 10 h.

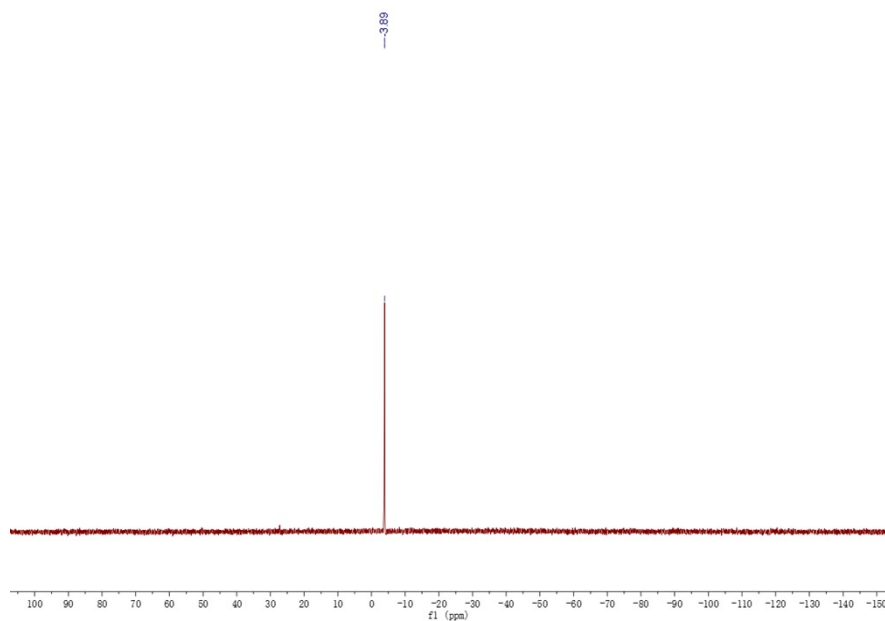

Figure S4  $^{31}\text{P}$  NMR of  $\text{P}(4\text{-FPh})_3$

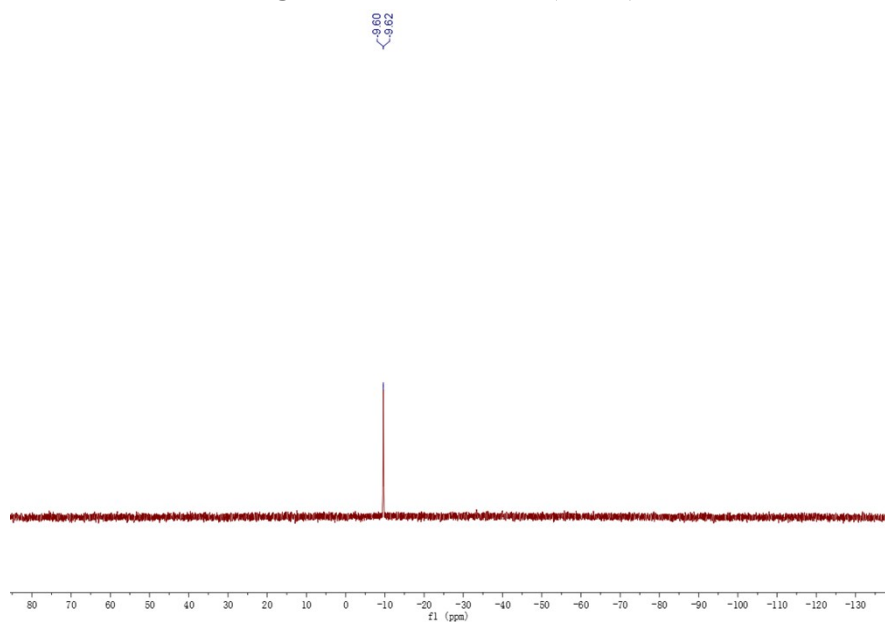

Figure S5  $^{31}\text{P}$  NMR of  $\text{IMesCuCl} + \text{P}(4\text{-FPh})_3$

## 4. General Procedure

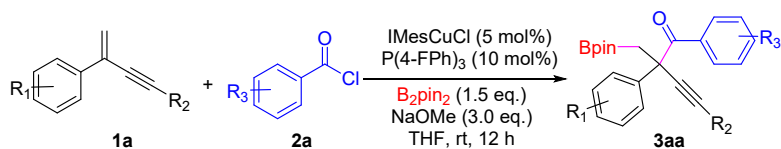

In a nitrogen-filled glove box, a 15 mL Schlenk tube equipped with magnetic stir bar was charged with  $\text{B}_2\text{Pin}_2$  (114.3 mg, 0.45 mmol, 1.5 eq.),  $\text{IMesCuCl}$  (6.1 mg, 0.015 mmol, 0.05 eq.),  $\text{P}(4\text{-FPh})_3$  (9.5 mg, 0.03 mmol, 0.1 eq.),  $\text{NaOMe}$  (48.6 mg, 0.9 mmol, 3.0 eq.). THF (1 mL) was added to the reaction tube, and the mixture was stirred at room temperature for 10 minutes. Then **1a** (63.6 mg, 0.3 mmol, 1.0 eq.) and **2a** (84 mg, 0.6 mmol, 2.0 eq.) were sequentially added. The



Schlenk tube was sealed quickly and removed from the glove box. The reaction mixture was stirred at room temperature for 10 hours. Then the solution was extracted with EtOAc. The combined organic phase was dried over Na<sub>2</sub>SO<sub>4</sub> and concentrated under reduced pressure. The residue was purified by flash chromatography on silica gel diluting with petroleum ether/EtOAc (v/v = 100:1) to afford the products **3aa**.

## 5. Spectroscopic Data of Products

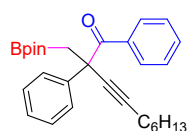

### 1,3-Diphenyl-3-(4,4,5,5-tetramethyl-1,3,2-dioxaborolan-2-yl)undec-4-yn-1-one (**3aa**)

The title compound was prepared from dec-1-en-3-yn-2-ylbenzene (63.6 mg, 0.3 mmol), Bis(pinacolato)diboron (114.3 mg, 0.45 mmol) and Benzoyl chloride (84 mg, 0.6 mmol). The crude residue was purified by flash chromatography (petroleum ether / ethyl acetate = 100:1, R<sub>f</sub> = 0.75) to afford the products as a yellow liquid (general procedure: 103.8 mg, 78%).

**<sup>1</sup>H NMR (500 MHz, CDCl<sub>3</sub>)** δ 7.88 (d, *J* = 7.5 Hz, 2H), 7.54 (d, *J* = 7.4 Hz, 2H), 7.36 (t, *J* = 7.4 Hz, 1H), 7.29 (t, *J* = 7.7 Hz, 2H), 7.25 - 7.19 (m, 3H), 2.25 (td, *J* = 6.9, 1.2 Hz, 2H), 1.75 (d, *J* = 15.2 Hz, 1H), 1.52 (d, *J* = 15.2 Hz, 1H), 1.48 - 1.43 (m, 2H), 1.29 (dd, *J* = 15.0, 7.5 Hz, 4H), 1.21 (d, *J* = 11.3 Hz, 14H), 0.86 (t, *J* = 7.0 Hz, 3H).

**<sup>13</sup>C NMR (126 MHz, CDCl<sub>3</sub>)** δ 197.1, 143.5, 135.2, 132.0, 130.7, 128.7, 127.6, 127.0, 126.6, 90.0, 82.9, 81.5, 53.7, 31.5, 28.6, 28.5, 25.0, 24.9, 22.7, 19.2, 14.2.

**HRMS (ESI) m/z:** [M+Na]<sup>+</sup> Calcd for C<sub>29</sub>H<sub>37</sub>BO<sub>3</sub>Na<sup>+</sup> 467.2737; Found 467.2725.

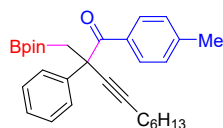

### 3-Phenyl-3-(4,4,5,5-tetramethyl-1,3,2-dioxaborolan-2-yl)-1-(p-tolyl)undec-4-yn-1-one (**3ab**)

The title compound was prepared from dec-1-en-3-yn-2-ylbenzene (63.6 mg, 0.3 mmol), Bis(pinacolato)diboron (114.3 mg, 0.45 mmol) and 4-methylbenzoyl chloride (92.4 mg, 0.6 mmol). The crude residue was purified by flash chromatography (petroleum ether / ethyl acetate = 100:1, R<sub>f</sub> = 0.75) to afford the products as a yellow liquid (general procedure: 81.1 mg, 59%).

**<sup>1</sup>H NMR (500 MHz, CDCl<sub>3</sub>)** δ 7.81 (d, *J* = 8.3 Hz, 2H), 7.57 - 7.49 (m, 2H), 7.28 (d, *J* = 7.5 Hz, 2H), 7.18 (t, *J* = 7.3 Hz, 1H), 7.02 (d, *J* = 8.2 Hz, 2H), 2.28 (s, 3H), 2.27 - 2.21 (m, 2H), 1.71 (d, *J* = 15.2 Hz, 1H), 1.49 (s, 1H), 1.48 - 1.41 (m, 2H), 1.31 (dt, *J* = 14.6, 7.2 Hz, 4H), 1.21 (d, *J* = 13.4 Hz, 14H), 0.86 (t, *J* = 7.0 Hz, 3H).

**<sup>13</sup>C NMR (126 MHz, CDCl<sub>3</sub>)** δ 196.5, 143.8, 142.7, 132.3, 130.9, 128.6, 128.3, 126.8, 126.5, 89.7, 82.8, 81.6, 53.6, 31.5, 28.6, 28.5, 25.0, 24.9, 22.7, 21.6, 19.2, 14.2.

**HRMS (ESI) m/z:** [M+Na]<sup>+</sup> Calcd for C<sub>30</sub>H<sub>39</sub>BO<sub>3</sub>Na<sup>+</sup> 481.2895; Found 481.2886.

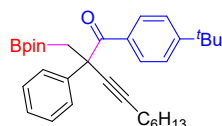

### 1-(4-(*tert*-Butyl)phenyl)-3-phenyl-3-(4,4,5,5-tetramethyl-1,3,2-dioxaborolan-2-yl)undec-4-yn-1-one (3ac)

The title compound was prepared from dec-1-en-3-yn-2-ylbenzene (63.6 mg, 0.3 mmol), Bis(pinacolato)diboron (114.3 mg, 0.45 mmol) and 4-(*tert*-butyl)benzoyl chloride (117.6 mg, 0.6 mmol). The crude residue was purified by flash chromatography (petroleum ether / ethyl acetate = 100:1,  $R_f$  = 0.75) to afford the products as a yellow liquid (general procedure: 88.6 mg, 59%).

**<sup>1</sup>H NMR (500 MHz, CDCl<sub>3</sub>)**  $\delta$  7.84 (d,  $J$  = 8.6 Hz, 2H), 7.54 (d,  $J$  = 7.4 Hz, 2H), 7.28 (d,  $J$  = 7.9 Hz, 2H), 7.24 (d,  $J$  = 8.6 Hz, 2H), 7.19 (d,  $J$  = 7.3 Hz, 1H), 2.25 (td,  $J$  = 6.9, 1.2 Hz, 2H), 1.70 (d,  $J$  = 15.2 Hz, 1H), 1.48 (s, 1H), 1.46 - 1.42 (m, 2H), 1.32 - 1.29 (m, 4H), 1.25 (s, 12H), 1.21 (d,  $J$  = 13.5 Hz, 14H), 0.86 (d,  $J$  = 6.8 Hz, 3H).

**<sup>13</sup>C NMR (126 MHz, CDCl<sub>3</sub>)**  $\delta$  196.5, 155.6, 143.8, 132.3, 130.8, 128.7, 126.9, 126.5, 124.6, 89.8, 82.9, 81.7, 53.6, 35.0, 31.5, 31.1, 28.6, 28.5, 25.0, 24.8, 22.7, 19.3, 14.2.

**HRMS (ESI) m/z:** [M+Na]<sup>+</sup> Calcd for C<sub>33</sub>H<sub>45</sub>BO<sub>3</sub>Na<sup>+</sup> 523.3366; Found 523.3359.

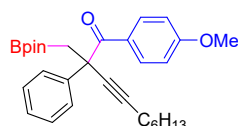

### 1-(4-Methoxyphenyl)-3-phenyl-3-(4,4,5,5-tetramethyl-1,3,2-dioxaborolan-2-yl)undec-4-yn-1-one (3ad)

The title compound was prepared from dec-1-en-3-yn-2-ylbenzene (63.6 mg, 0.3 mmol), Bis(pinacolato)diboron (114.3 mg, 0.45 mmol) and 4-methoxybenzoyl chloride (102.4 mg, 0.6 mmol). The crude residue was purified by flash chromatography (petroleum ether / ethyl acetate = 100:1,  $R_f$  = 0.75) to afford the products as a yellow liquid (general procedure: 91.1 mg, 64%).

**<sup>1</sup>H NMR (500 MHz, CDCl<sub>3</sub>)**  $\delta$  7.92 (d,  $J$  = 8.9 Hz, 2H), 7.52 (d,  $J$  = 7.7 Hz, 2H), 7.30 - 7.26 (m, 2H), 7.18 (t,  $J$  = 7.3 Hz, 1H), 6.71 (d,  $J$  = 8.9 Hz, 2H), 3.76 (s, 3H), 2.26 (t,  $J$  = 6.9 Hz, 2H), 1.69 (d,  $J$  = 15.2 Hz, 1H), 1.52 - 1.50 (m, 1H), 1.48 (dd,  $J$  = 9.9, 5.7 Hz, 2H), 1.32 (dt,  $J$  = 14.5, 7.2 Hz, 4H), 1.21 (d,  $J$  = 14.7 Hz, 14H), 0.86 (t,  $J$  = 6.9 Hz, 3H).

**<sup>13</sup>C NMR (126 MHz, CDCl<sub>3</sub>)**  $\delta$  195.4, 162.6, 144.0, 133.2, 128.6, 127.6, 126.8, 126.5, 112.8, 89.7, 82.8, 81.7, 55.3, 53.5, 31.5, 28.6, 28.6, 25.0, 24.9, 22.7, 19.2, 14.2.

**HRMS (ESI) m/z:** [M+Na]<sup>+</sup> Calcd for C<sub>30</sub>H<sub>39</sub>BO<sub>4</sub>Na<sup>+</sup> 497.2844; Found 497.2836.

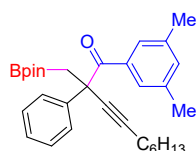

### 1-(3,5-Dimethylphenyl)-3-phenyl-3-(4,4,5,5-tetramethyl-1,3,2-dioxaborolan-2-yl)undec-4-yn-1-one (3ae)

The title compound was prepared from dec-1-en-3-yn-2-ylbenzene (63.6 mg, 0.3 mmol), Bis(pinacolato)diboron (114.3 mg, 0.45 mmol) and 3,5-dimethylbenzoyl chloride (100.8 mg, 0.6

mmol). The crude residue was purified by flash chromatography (petroleum ether / ethyl acetate = 100:1, R<sub>f</sub> = 0.75) to afford the products as a yellow liquid (general procedure: 99.2 mg, 70%).

**<sup>1</sup>H NMR (500 MHz, CDCl<sub>3</sub>)** δ 7.53 (dd, *J* = 12.7, 5.4 Hz, 4H), 7.28 (d, *J* = 7.4 Hz, 2H), 7.18 (t, *J* = 7.3 Hz, 1H), 6.98 (s, 1H), 2.25 (q, *J* = 6.9 Hz, 2H), 2.20 (s, 6H), 1.73 (d, *J* = 15.2 Hz, 1H), 1.50 (d, *J* = 11.9 Hz, 1H), 1.45 (dd, *J* = 15.7, 9.0 Hz, 2H), 1.33 - 1.27 (m, 4H), 1.20 (d, *J* = 11.2 Hz, 14H), 0.86 (t, *J* = 7.0 Hz, 3H).

**<sup>13</sup>C NMR (126 MHz, CDCl<sub>3</sub>)** δ 197.3, 143.6, 137.0, 135.1, 133.7, 128.6, 128.6, 126.9, 126.5, 89.7, 82.9, 81.7, 53.7, 31.5, 28.7, 28.6, 25.0, 24.9, 22.7, 21.3, 19.3, 14.2.

**HRMS (ESI) m/z:** [M+Na]<sup>+</sup> Calcd for C<sub>31</sub>H<sub>41</sub>BO<sub>3</sub>Na<sup>+</sup> 495.3052; Found 495.3045.

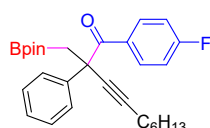

### 1-(4-Fluorophenyl)-3-phenyl-3-(4,4,5,5-tetramethyl-1,3,2-dioxaborolan-2-yl)undec-4-yn-1-one (3af)

The title compound was prepared from dec-1-en-3-yn-2-ylbenzene (63.6 mg, 0.3 mmol), Bis(pinacolato)diboron (114.3 mg, 0.45 mmol) and 4-fluorobenzoyl chloride (72.1 mg, 0.6 mmol). The crude residue was purified by flash chromatography (petroleum ether / ethyl acetate = 100:1, R<sub>f</sub> = 0.75) to afford the products as a light yellow liquid (general procedure: 103.8 mg, 52%).

**<sup>1</sup>H NMR (500 MHz, CDCl<sub>3</sub>)** δ 7.96 – 7.88 (m, 2H), 7.52 (d, *J* = 7.4 Hz, 2H), 7.30 (t, *J* = 7.7 Hz, 2H), 7.21 (t, *J* = 7.3 Hz, 1H), 6.90 (t, *J* = 8.7 Hz, 2H), 2.26 (t, *J* = 6.8 Hz, 2H), 1.73 (d, *J* = 15.3 Hz, 1H), 1.53 – 1.49 (m, 1H), 1.48 – 1.43 (m, 2H), 1.33 – 1.27 (m, 4H), 1.21 (d, *J* = 12.1 Hz, 14H), 0.86 (t, *J* = 6.9 Hz, 3H).

**<sup>13</sup>C NMR (126 MHz, CDCl<sub>3</sub>)** δ 195.5, 164.9 (d, *J* = 252.0 Hz), 143.3, 133.4 (d, *J* = 12.6 Hz), 131.4 (d, *J* = 2.5 Hz), 128.8, 127.1, 126.5, 114.7 (d, *J* = 21.4 Hz), 90.2, 82.9, 81.4, 53.6, 31.5, 28.6, 28.6, 25.0, 24.9, 22.7, 19.2, 14.2.

**HRMS (ESI) m/z:** [M+Na]<sup>+</sup> Calcd for C<sub>22</sub>H<sub>13</sub>NO<sub>2</sub>Na<sup>+</sup> 346.0838; Found 346.0835.

**<sup>19</sup>F NMR (471 MHz, CDCl<sub>3</sub>)** δ -106.7.

**HRMS (ESI) m/z:** [M+Na]<sup>+</sup> Calcd for C<sub>29</sub>H<sub>36</sub>BFO<sub>3</sub>Na<sup>+</sup> 485.2643; Found 485.2638.

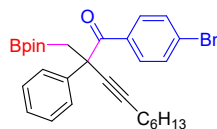

### 1-(4-Bromophenyl)-3-phenyl-3-(4,4,5,5-tetramethyl-1,3,2-dioxaborolan-2-yl)undec-4-yn-1-one (3ag)

The title compound was prepared from dec-1-en-3-yn-2-ylbenzene (63.6 mg, 0.3 mmol), Bis(pinacolato)diboron (114.3 mg, 0.45 mmol) and 1-(4-bromophenyl)ethan-1-one (119.7 mg, 0.6 mmol). The crude residue was purified by flash chromatography (petroleum ether / ethyl acetate = 100:1, R<sub>f</sub> = 0.75) to afford the products as a yellow liquid (general procedure: 98.9 mg, 63%).

**<sup>1</sup>H NMR (500 MHz, CDCl<sub>3</sub>)** δ 7.76 - 7.71 (m, 2H), 7.50 (dd, *J* = 8.3, 1.1 Hz, 2H), 7.37 - 7.34 (m, 2H), 7.29 (t, *J* = 7.6 Hz, 2H), 7.21 (t, *J* = 7.3 Hz, 1H), 2.24 (td, *J* = 6.9, 1.4 Hz, 2H), 1.73 (d, *J* =

15.3 Hz, 1H), 1.51 (d,  $J = 15.3$  Hz, 1H), 1.46 (dd,  $J = 8.4, 5.8$  Hz, 2H), 1.31 - 1.26 (m, 4H), 1.21 (dd,  $J = 12.0, 7.4$  Hz, 14H), 0.86 (t,  $J = 7.0$  Hz, 3H).

$^{13}\text{C}$  NMR (126 MHz,  $\text{CDCl}_3$ )  $\delta$  196.1, 143.1, 134.0, 132.2, 131.0, 128.9, 127.2, 126.5, 90.4, 83.0, 81.2, 53.6, 31.5, 28.6, 24.9, 24.9, 22.7, 19.2, 14.2.

HRMS (ESI)  $m/z$ :  $[\text{M}+\text{Na}]^+$  Calcd for  $\text{C}_{29}\text{H}_{36}\text{BBrO}_3\text{Na}^+$  545.1841; Found 545.1838.

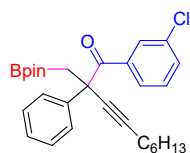

### 1-(3-Chlorophenyl)-3-phenyl-3-(4,4,5,5-tetramethyl-1,3,2-dioxaborolan-2-yl)undec-4-yn-1-one (3ah)

The title compound was prepared from dec-1-en-3-yn-2-ylbenzene (63.6 mg, 0.3 mmol), Bis(pinacolato)diboron (114.3 mg, 0.45 mmol) and 1-(3-chlorophenyl)ethan-1-one (92.8 mg, 0.6 mmol). The crude residue was purified by flash chromatography (petroleum ether / ethyl acetate = 100:1,  $R_f = 0.75$ ) to afford the products as a yellow liquid (general procedure: 64.6 mg, 45%).

$^1\text{H}$  NMR (500 MHz,  $\text{CDCl}_3$ )  $\delta$  7.88 (s, 1H), 7.69 (d,  $J = 7.9$  Hz, 1H), 7.52 (d,  $J = 7.7$  Hz, 2H), 7.30 (dd,  $J = 12.6, 6.8$  Hz, 3H), 7.21 (t,  $J = 7.3$  Hz, 1H), 7.13 (td,  $J = 7.9, 1.5$  Hz, 1H), 2.25 (dd,  $J = 11.1, 6.8$  Hz, 2H), 1.76 (d,  $J = 15.3$  Hz, 1H), 1.51 (d,  $J = 15.4$  Hz, 1H), 1.46 (dd,  $J = 10.9, 6.3$  Hz, 2H), 1.31–1.27 (m, 4H), 1.20 (d,  $J = 9.5$  Hz, 14H), 0.86 (t,  $J = 6.9$  Hz, 3H).

$^{13}\text{C}$  NMR (126 MHz,  $\text{CDCl}_3$ )  $\delta$  196.0, 142.8, 137.0, 133.8, 131.9, 130.5, 128.9, 128.7, 127.2, 126.5, 90.5, 83.0, 81.1, 53.7, 31.5, 28.6, 24.9, 24.9, 22.7, 19.2, 14.2.

HRMS (ESI)  $m/z$ :  $[\text{M}+\text{Na}]^+$  Calcd for  $\text{C}_{29}\text{H}_{36}\text{BClO}_3\text{Na}^+$  501.2342; Found 501.2338.

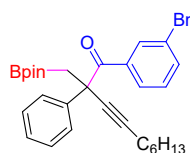

### 1-(3-Bromophenyl)-3-phenyl-3-(4,4,5,5-tetramethyl-1,3,2-dioxaborolan-2-yl)undec-4-yn-1-one (3ai)

The title compound was prepared from dec-1-en-3-yn-2-ylbenzene (63.6 mg, 0.3 mmol), Bis(pinacolato)diboron (114.3 mg, 0.45 mmol) and 3-bromobenzoyl chloride (131.7 mg, 0.6 mmol). The crude residue was purified by flash chromatography (petroleum ether / ethyl acetate = 100:1,  $R_f = 0.75$ ) to afford the products as a yellow liquid (general procedure: 54.9 mg, 35%).

$^1\text{H}$  NMR (500 MHz,  $\text{CDCl}_3$ )  $\delta$  8.05 (t,  $J = 1.8$  Hz, 1H), 7.74 - 7.71 (m, 1H), 7.54 - 7.50 (m, 2H), 7.47 (ddd,  $J = 7.9, 2.0, 1.0$  Hz, 1H), 7.30 (dd,  $J = 13.6, 1.7$  Hz, 2H), 7.24 - 7.20 (m, 1H), 7.07 (t,  $J = 7.9$  Hz, 1H), 2.25 (td,  $J = 6.9, 4.5$  Hz, 2H), 1.76 (d,  $J = 15.3$  Hz, 1H), 1.51 (d,  $J = 15.3$  Hz, 1H), 1.48 - 1.44 (m, 2H), 1.29 (dd,  $J = 9.9, 5.2$  Hz, 4H), 1.20 (d,  $J = 9.3$  Hz, 14H), 0.86 (t,  $J = 7.0$  Hz, 3H).

$^{13}\text{C}$  NMR (126 MHz,  $\text{CDCl}_3$ )  $\delta$  195.9, 142.8, 137.2, 134.8, 133.4, 129.2, 129.1, 128.9, 127.2, 126.5, 121.9, 90.5, 83.0, 81.1, 53.7, 31.5, 28.6, 28.6, 24.9, 24.9, 22.7, 19.2, 14.2.

HRMS (ESI)  $m/z$ :  $[\text{M}+\text{Na}]^+$  Calcd for  $\text{C}_{29}\text{H}_{36}\text{BBrO}_3\text{Na}^+$  547.1826; Found 547.1827.

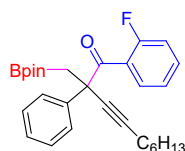

**1-(2-Fluorophenyl)-3-phenyl-3-(4,4,5,5-tetramethyl-1,3,2-dioxaborolan-2-yl)undec-4-yn-1-one (3aj)**

The title compound was prepared from dec-1-en-3-yn-2-ylbenzene (63.6 mg, 0.3 mmol), Bis(pinacolato)diboron (114.3 mg, 0.45 mmol) and 2-fluorobenzoyl chloride (95.1 mg, 0.6 mmol). The crude residue was purified by flash chromatography (petroleum ether / ethyl acetate = 100:1,  $R_f$  = 0.75) to afford the products as a yellow liquid (general procedure: 74.9 mg, 54%).

**$^1\text{H}$  NMR (500 MHz,  $\text{CDCl}_3$ )**  $\delta$  7.61 (d,  $J$  = 7.5 Hz, 2H), 7.36 - 7.28 (m, 4H), 7.24 (d,  $J$  = 7.4 Hz, 1H), 7.00 - 6.91 (m, 2H), 2.19 (td,  $J$  = 6.9, 4.6 Hz, 2H), 1.96 (d,  $J$  = 15.3 Hz, 1H), 1.57 (d,  $J$  = 15.3 Hz, 1H), 1.41 - 1.35 (m, 2H), 1.27 - 1.23 (m, 4H), 1.20 (d,  $J$  = 3.2 Hz, 14H), 0.88 (t,  $J$  = 7.1 Hz, 3H).

**$^{13}\text{C}$  NMR (126 MHz,  $\text{CDCl}_3$ )**  $\delta$  198.1 (d,  $J$  = 2.1 Hz), 161.1, 159.0, 141.5, 132.2 (d,  $J$  = 12.6 Hz), 130.5 (d,  $J$  = 2.5 Hz), 128.5, 127.2, 127.0, 122.9 (d,  $J$  = 21.4 Hz), 116.0 (d,  $J$  = 22.1 Hz), 89.3, 83.2, 80.7, 55.1, 31.5, 28.6, 28.5, 25.0, 24.8, 22.7, 19.1, 14.2.

**$^{19}\text{F}$  NMR (471 MHz,  $\text{CDCl}_3$ )**  $\delta$  -110.5.

**HRMS (ESI)  $m/z$ :**  $[\text{M}+\text{Na}]^+$  Calcd for  $\text{C}_{29}\text{H}_{36}\text{BFO}_3\text{Na}^+$  485.2643; Found 485.2635.

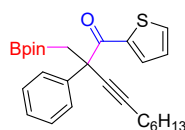

**2-Phenyl-2-((4,4,5,5-tetramethyl-1,3,2-dioxaborolan-2-yl)methyl)-1-(thiophen-2-yl)dec-3-yn-1-one (3ak)**

The title compound was prepared from dec-1-en-3-yn-2-ylbenzene (63.6 mg, 0.3 mmol), Bis(pinacolato)diboron (114.3 mg, 0.45 mmol) and thiophene-2-carbonyl chloride (88.0 mg, 0.6 mmol). The crude residue was purified by flash chromatography (petroleum ether / ethyl acetate = 100:1,  $R_f$  = 0.75) to afford the products as a yellow liquid (general procedure: 91.9 mg, 68%).

**$^1\text{H}$  NMR (500 MHz,  $\text{CDCl}_3$ )**  $\delta$  7.63 (dd,  $J$  = 3.9, 1.0 Hz, 1H), 7.57 (dd,  $J$  = 8.2, 1.0 Hz, 2H), 7.44 (dd,  $J$  = 4.9, 1.0 Hz, 1H), 7.29 (t,  $J$  = 7.7 Hz, 2H), 7.21 (t,  $J$  = 7.3 Hz, 1H), 6.88 (dd,  $J$  = 4.9, 3.9 Hz, 1H), 2.31 (t,  $J$  = 7.0 Hz, 2H), 1.74 (d,  $J$  = 15.3 Hz, 1H), 1.57 (d,  $J$  = 4.1 Hz, 1H), 1.54 (dd,  $J$  = 9.4, 4.3 Hz, 2H), 1.42- 1.36 (m, 2H), 1.27 (dd,  $J$  = 6.9, 3.3 Hz, 4H), 1.19 (d,  $J$  = 11.7 Hz, 12H), 0.88 (t,  $J$  = 6.9 Hz, 3H).

**$^{13}\text{C}$  NMR (126 MHz,  $\text{CDCl}_3$ )**  $\delta$  190.0, 143.2, 141.1, 135.0, 133.0, 128.6, 127.4, 127.1, 126.8, 89.9, 82.9, 81.4, 53.8, 31.5, 28.6, 28.6, 24.9, 24.9, 22.7, 19.3, 14.2.

**HRMS (ESI)  $m/z$ :**  $[\text{M}+\text{Na}]^+$  Calcd for  $\text{C}_{27}\text{H}_{35}\text{BO}_3\text{SNa}^+$  473.2292; Found 473.2307.

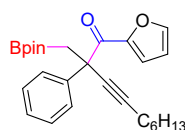

### 1-(Furan-2-yl)-2-phenyl-2-((4,4,5,5-tetramethyl-1,3,2-dioxaborolan-2-yl)methyl)dec-3-yn-1-one (3al)

The title compound was prepared from dec-1-en-3-yn-2-ylbenzene (63.6 mg, 0.3 mmol), Bis(pinacolato)diboron (114.3 mg, 0.45 mmol) and furan-2-carbonyl chloride (78.3 mg, 0.6 mmol). The crude residue was purified by flash chromatography (petroleum ether / ethyl acetate = 100:1, R<sub>f</sub> = 0.75) to afford the products as a yellow liquid (general procedure: 78.2 mg, 60%).

**<sup>1</sup>H NMR (500 MHz, CDCl<sub>3</sub>)** δ 7.56 - 7.51 (m, 2H), 7.44 (d, *J* = 1.0 Hz, 1H), 7.31 - 7.27 (m, 2H), 7.20 (t, *J* = 7.3 Hz, 1H), 6.98 (d, *J* = 3.6 Hz, 1H), 6.30 (dd, *J* = 3.6, 1.7 Hz, 1H), 2.31 (t, *J* = 7.0 Hz, 2H), 1.74 (d, *J* = 15.3 Hz, 1H), 1.55 (dt, *J* = 7.0, 3.0 Hz, 3H), 1.44 - 1.37 (m, 2H), 1.30 - 1.25 (m, 4H), 1.18 (d, *J* = 10.3 Hz, 12H), 0.88 (t, *J* = 5.0 Hz, 3H).

**<sup>13</sup>C NMR (126 MHz, CDCl<sub>3</sub>)** δ 185.6, 149.9, 146.0, 143.1, 128.5, 127.1, 126.6, 120.7, 111.6, 89.2, 83.0, 81.0, 52.7, 31.5, 28.7, 28.6, 24.9, 24.9, 22.7, 19.2, 14.2.

**HRMS (ESI) m/z:** [M+Na]<sup>+</sup> Calcd for C<sub>27</sub>H<sub>35</sub>BO<sub>4</sub>Na<sup>+</sup> 457.2521; Found 457.2529.

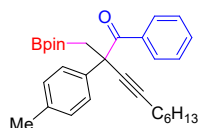

### 1-Phenyl-3-(4,4,5,5-tetramethyl-1,3,2-dioxaborolan-2-yl)-3-(p-tolyl)undec-4-yn-1-one (3ba)

The title compound was prepared from 1-(dec-1-en-3-yn-2-yl)-4-methylbenzene (67.9 mg, 0.3 mmol), Bis(pinacolato)diboron (114.3 mg, 0.45 mmol) and benzoyl chloride (84 mg, 0.6 mmol). The crude residue was purified by flash chromatography (petroleum ether / ethyl acetate = 100:1, R<sub>f</sub> = 0.75) to afford the products as a yellow liquid (general procedure: 75.6 mg, 55%).

**<sup>1</sup>H NMR (500 MHz, CDCl<sub>3</sub>)** δ 7.88 (d, *J* = 8.4 Hz, 2H), 7.42 (d, *J* = 8.2 Hz, 2H), 7.35 (t, *J* = 7.4 Hz, 1H), 7.22 (t, *J* = 7.7 Hz, 2H), 7.09 (d, *J* = 8.0 Hz, 2H), 2.29 (s, 3H), 2.23 (td, *J* = 6.9, 1.7 Hz, 2H), 1.73 (d, *J* = 15.2 Hz, 1H), 1.48 (d, *J* = 15.3 Hz, 1H), 1.45 - 1.41 (m, 2H), 1.30 - 1.25 (m, 4H), 1.22 (d, *J* = 11.7 Hz, 14H), 0.85 (t, *J* = 7.0 Hz, 3H).

**<sup>13</sup>C NMR (126 MHz, CDCl<sub>3</sub>)** δ 197.3, 140.5, 136.5, 135.3, 131.9, 130.7, 129.4, 127.6, 126.4, 89.7, 82.9, 81.7, 53.4, 31.5, 28.6, 28.5, 25.0, 24.9, 22.7, 21.1, 19.2, 14.2.

**HRMS (ESI) m/z:** [M+Na]<sup>+</sup> Calcd for C<sub>30</sub>H<sub>39</sub>BO<sub>3</sub>Na<sup>+</sup> 481.2895; Found 481.2888.

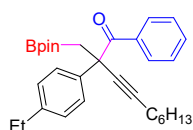

### 3-(4-Ethylphenyl)-1-phenyl-3-(4,4,5,5-tetramethyl-1,3,2-dioxaborolan-2-yl)undec-4-yn-1-one (3ca)

The title compound was prepared from 1-(dec-1-en-3-yn-2-yl)-4-ethylbenzene (72.1 mg, 0.3 mmol), Bis(pinacolato)diboron (114.3 mg, 0.45 mmol) and benzoyl chloride (84 mg, 0.6 mmol). The crude residue was purified by flash chromatography (petroleum ether / ethyl acetate = 100:1, R<sub>f</sub> = 0.75) to afford the products as a yellow liquid (general procedure: 76.5 mg, 54%).

**<sup>1</sup>H NMR (500 MHz, CDCl<sub>3</sub>)** δ 7.87 (dd, *J* = 8.4, 1.2 Hz, 2H), 7.46 - 7.41 (m, 2H), 7.35 (t, *J* = 7.4 Hz, 1H), 7.22 (t, *J* = 7.8 Hz, 2H), 7.11 (d, *J* = 8.3 Hz, 2H), 2.60 (q, *J* = 7.6 Hz, 2H), 2.23 (td, *J* =

6.9, 1.9 Hz, 2H), 1.73 (d,  $J = 15.2$  Hz, 1H), 1.50 (d,  $J = 15.2$  Hz, 1H), 1.46 - 1.42 (m, 2H), 1.28 (dd,  $J = 13.7, 6.4$  Hz, 3H), 1.20 (dd,  $J = 13.9, 4.7$  Hz, 18H), 0.85 (t,  $J = 7.0$  Hz, 3H).

$^{13}\text{C NMR}$  (500 MHz,  $\text{CDCl}_3$ )  $\delta$  197.3, 142.9, 140.6, 135.4, 131.9, 130.7, 128.2, 127.6, 126.5, 89.7, 82.9, 81.8, 53.4, 31.5, 28.6, 28.5, 28.5, 25.0, 24.9, 22.7, 19.2, 15.5, 14.2.

**HRMS (ESI) m/z:**  $[\text{M}+\text{Na}]^+$  Calcd for  $\text{C}_{31}\text{H}_{41}\text{BO}_3\text{Na}^+$  495.3052; Found 495.3045.

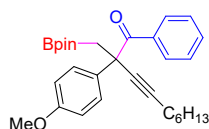

### 3-(4-Methoxyphenyl)-1-phenyl-3-(4,4,5,5-tetramethyl-1,3,2-dioxaborolan-2-yl)undec-4-yn-1-one (3da)

The title compound was prepared from 1-(dec-1-en-3-yn-2-yl)-4-methoxybenzene (72.7 mg, 0.3 mmol), Bis(pinacolato)diboron (114.3 mg, 0.45 mmol) and benzoyl chloride (84 mg, 0.6 mmol). The crude residue was purified by flash chromatography (petroleum ether / ethyl acetate = 100:1,  $R_f = 0.75$ ) to afford the products as a yellow liquid (general procedure: 85.4 mg, 60%).

$^1\text{H NMR}$  (500 MHz,  $\text{CDCl}_3$ )  $\delta$  8.08 - 7.65 (m, 2H), 7.53 - 7.41 (m, 2H), 7.40 - 7.32 (m, 1H), 7.23 (t,  $J = 7.8$  Hz, 2H), 6.89 - 6.76 (m, 2H), 3.77 (s, 3H), 2.23 (td,  $J = 6.9, 1.7$  Hz, 2H), 1.73 (d,  $J = 15.2$  Hz, 1H), 1.50 (d,  $J = 15.2$  Hz, 1H), 1.47 - 1.41 (m, 2H), 1.32 - 1.25 (m, 4H), 1.22 (d,  $J = 10.0$  Hz, 14H), 0.86 (t,  $J = 7.0$  Hz, 3H).

$^{13}\text{C NMR}$  (126 MHz,  $\text{CDCl}_3$ )  $\delta$  197.2, 158.4, 135.4, 135.3, 131.8, 130.5, 127.6, 127.5, 113.9, 89.6, 82.8, 81.7, 55.2, 52.9, 52.9, 31.4, 28.5, 28.4, 24.9, 24.8, 22.6, 19.1, 14.1.

**HRMS (ESI) m/z:**  $[\text{M}+\text{Na}]^+$  Calcd for  $\text{C}_{30}\text{H}_{39}\text{BO}_4\text{Na}^+$  497.2833; Found 497.2835.

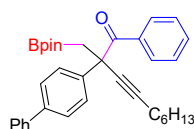

### 3-([1,1'-Biphenyl]-4-yl)-1-phenyl-3-(4,4,5,5-tetramethyl-1,3,2-dioxaborolan-2-yl)undec-4-yn-1-one (3ea)

The title compound was prepared from 4-(dec-1-en-3-yn-2-yl)-1,1'-biphenyl (86.5 mg, 0.3 mmol), Bis(pinacolato)diboron (114.3 mg, 0.45 mmol) and benzoyl chloride (84 mg, 0.6 mmol). The crude residue was purified by flash chromatography (petroleum ether / ethyl acetate = 100:1,  $R_f = 0.75$ ) to afford the products as a yellow liquid (general procedure: 107.7 mg, 69%).

$^1\text{H NMR}$  (500 MHz,  $\text{CDCl}_3$ )  $\delta$  7.92 (d,  $J = 8.3$  Hz, 2H), 7.62 (d,  $J = 8.1$  Hz, 2H), 7.57 (d,  $J = 8.0$  Hz, 2H), 7.54 (d,  $J = 8.2$  Hz, 2H), 7.42 (d,  $J = 6.5$  Hz, 2H), 7.37 (t,  $J = 7.4$  Hz, 1H), 7.31 (d,  $J = 7.4$  Hz, 1H), 7.26 - 7.21 (m, 2H), 2.26 (t,  $J = 6.9$  Hz, 2H), 1.79 (d,  $J = 15.3$  Hz, 1H), 1.57 (d,  $J = 15.2$  Hz, 1H), 1.50 - 1.45 (m, 2H), 1.34 - 1.28 (m, 4H), 1.22 (d,  $J = 11.3$  Hz, 14H), 0.87 (t,  $J = 6.6$  Hz, 3H).

$^{13}\text{C NMR}$  (126 MHz,  $\text{CDCl}_3$ )  $\delta$  197.1, 142.5, 140.7, 139.7, 135.2, 132.1, 130.7, 128.8, 127.6, 127.4, 127.1, 127.0, 90.0, 82.9, 81.5, 60.5, 53.4, 31.5, 28.6, 28.5, 25.0, 24.9, 22.7, 19.2, 14.2.

**HRMS (ESI) m/z:**  $[\text{M}+\text{Na}]^+$  Calcd for  $\text{C}_{35}\text{H}_{41}\text{BO}_3\text{Na}^+$  543.3054; Found 543.3046.

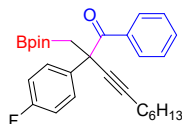

### 3-(4-Fluorophenyl)-1-phenyl-3-(4,4,5,5-tetramethyl-1,3,2-dioxaborolan-2-yl)undec-4-yn-1-one (3fa)

The title compound was prepared from 1-(dec-1-en-3-yn-2-yl)-4-fluorobenzene (69.1 mg, 0.3 mmol), Bis(pinacolato)diboron (114.3 mg, 0.45 mmol) and benzoyl chloride (84 mg, 0.6 mmol). The crude residue was purified by flash chromatography (petroleum ether / ethyl acetate = 100:1,  $R_f = 0.75$ ) to afford the products as a yellow liquid (general procedure: 81.8 mg, 59%).

**<sup>1</sup>H NMR (500 MHz, CDCl<sub>3</sub>)**  $\delta$  7.85 (d,  $J = 7.4$  Hz, 2H), 7.50 (dd,  $J = 8.8, 5.3$  Hz, 2H), 7.37 (t,  $J = 7.4$  Hz, 1H), 7.23 (t,  $J = 7.8$  Hz, 2H), 6.97 (t,  $J = 8.7$  Hz, 2H), 2.23 (t,  $J = 6.7$  Hz, 2H), 1.70 (d,  $J = 15.3$  Hz, 1H), 1.51 (d,  $J = 15.3$  Hz, 1H), 1.47 - 1.41 (m, 2H), 1.28 - 1.24 (m, 5H), 1.20 (d,  $J = 8.3$  Hz, 13H), 0.85 (t,  $J = 7.0$  Hz, 3H).

**<sup>13</sup>C NMR (126 MHz, CDCl<sub>3</sub>)**  $\delta$  196.9, 161.9 (d,  $J = 245.7$  Hz), 139.1 (d,  $J = 2.8$  Hz), 135.1, 132.2, 130.7, 128.4 (d,  $J = 8.1$  Hz), 127.7, 115.5 (d,  $J = 21.2$  Hz), 90.2, 83.0, 81.4, 53.1, 31.5, 28.6, 25.0, 24.9, 22.7, 19.2, 14.2.

**<sup>19</sup>F NMR (471 MHz, CDCl<sub>3</sub>)**  $\delta$  -116.2.

**HRMS (ESI) m/z:** [M+Na]<sup>+</sup> Calcd for C<sub>29</sub>H<sub>36</sub>BFO<sub>3</sub>Na<sup>+</sup> 485.2643; Found 485.2635.

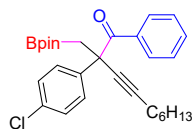

### 3-(4-Chlorophenyl)-1-phenyl-3-(4,4,5,5-tetramethyl-1,3,2-dioxaborolan-2-yl)undec-4-yn-1-one (3ga)

The title compound was prepared from 1-chloro-4-(dec-1-en-3-yn-2-yl)benzene (74.0 mg, 0.3 mmol), Bis(pinacolato)diboron (114.3 mg, 0.45 mmol) and benzoyl chloride (84 mg, 0.6 mmol). The crude residue was purified by flash chromatography (petroleum ether / ethyl acetate = 100:1,  $R_f = 0.75$ ) to afford the products as a yellow liquid (general procedure: 74.7 mg, 52%).

**<sup>1</sup>H NMR (500 MHz, CDCl<sub>3</sub>)**  $\delta$  7.86 (d,  $J = 8.2$  Hz, 2H), 7.48 (d,  $J = 8.4$  Hz, 2H), 7.37 (t,  $J = 6.9$  Hz, 2H), 7.23 (dd,  $J = 14.0, 6.1$  Hz, 3H), 2.23 (t,  $J = 6.9$  Hz, 2H), 1.70 (d,  $J = 15.3$  Hz, 1H), 1.48 (s, 1H), 1.46 - 1.41 (m, 2H), 1.29 (d,  $J = 7.6$  Hz, 4H), 1.21 (d,  $J = 8.5$  Hz, 14H), 0.86 (d,  $J = 6.6$  Hz, 3H).

**<sup>13</sup>C NMR (126 MHz, CDCl<sub>3</sub>)**  $\delta$  196.7, 142.1, 134.9, 132.9, 132.2, 130.6, 128.8, 128.1, 127.7, 90.3, 83.0, 81.2, 60.5, 53.2, 31.4, 28.5, 24.9, 24.9, 22.7, 19.2, 14.2.

**HRMS (ESI) m/z:** [M+Na]<sup>+</sup> Calcd for C<sub>29</sub>H<sub>36</sub>BClO<sub>3</sub>Na<sup>+</sup> 501.2342; Found 501.2340.

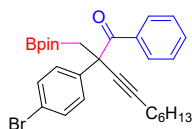

### 3-(4-Bromophenyl)-1-phenyl-3-(4,4,5,5-tetramethyl-1,3,2-dioxaborolan-2-yl)undec-4-yn-1-one (3ha)



The title compound was prepared from 1-bromo-4-(dec-1-en-3-yn-2-yl)benzene (87.4 mg, 0.3 mmol), Bis(pinacolato)diboron (114.3 mg, 0.45 mmol) and benzoyl chloride (84 mg, 0.6 mmol). The crude residue was purified by flash chromatography (petroleum ether / ethyl acetate = 100:1, R<sub>f</sub> = 0.75) to afford the products as a yellow liquid (general procedure: 78.5 mg, 50%).

**<sup>1</sup>H NMR (500 MHz, CDCl<sub>3</sub>)** δ 7.71 (dd, *J* = 8.4, 1.1 Hz, 2H), 7.26 - 7.20 (m, 4H), 7.12 - 7.07 (m, 3H), 2.08 (td, *J* = 6.9, 1.0 Hz, 2H), 1.55 (d, *J* = 15.3 Hz, 1H), 1.34 (d, *J* = 15.3 Hz, 1H), 1.29 (ddd, *J* = 8.2, 7.0, 2.0 Hz, 2H), 1.14 - 1.10 (m, 4H), 1.06 (d, *J* = 8.4 Hz, 14H), 0.70 (t, *J* = 7.0 Hz, 3H).

**<sup>13</sup>C NMR (126 MHz, CDCl<sub>3</sub>)** δ 196.6, 142.6, 134.9, 132.3, 131.8, 130.7, 128.5, 127.7, 121.0, 90.4, 83.0, 81.1, 53.3, 31.4, 28.5, 25.0, 24.9, 22.7, 19.2, 14.2.

**HRMS (ESI) m/z:** [M+Na]<sup>+</sup> Calcd for C<sub>29</sub>H<sub>36</sub>BBrO<sub>3</sub>Na<sup>+</sup> 545.1833; Found 545.1835.

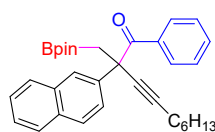

### 3-(Naphthalen-2-yl)-1-phenyl-3-(4,4,5,5-tetramethyl-1,3,2-dioxaborolan-2-yl)undec-4-yn-1-one (3ia)

The title compound was prepared from 2-(dec-1-en-3-yn-2-yl)naphthalene (78.7 mg, 0.3 mmol), Bis(pinacolato)diboron (114.3 mg, 0.45 mmol) and benzoyl chloride (84 mg, 0.6 mmol). The crude residue was purified by flash chromatography (petroleum ether / ethyl acetate = 100:1, R<sub>f</sub> = 0.75) to afford the products as a yellow liquid (general procedure: 59.3 mg, 40%).

**<sup>1</sup>H NMR (500 MHz, CDCl<sub>3</sub>)** δ 8.12 (s, 1H), 7.92 (d, *J* = 8.2 Hz, 2H), 7.83 - 7.75 (m, 3H), 7.58 (d, *J* = 8.6 Hz, 1H), 7.44 (dd, *J* = 14.2, 6.9 Hz, 2H), 7.32 (t, *J* = 6.9 Hz, 1H), 7.19 (t, *J* = 7.4 Hz, 2H), 2.30 (t, *J* = 6.8 Hz, 2H), 1.84 (d, *J* = 15.3 Hz, 1H), 1.59 (d, *J* = 15.3 Hz, 1H), 1.52 - 1.47 (m, 2H), 1.38 - 1.31 (m, 4H), 1.21 (d, *J* = 14.5 Hz, 14H), 0.87 (t, *J* = 6.6 Hz, 3H).

**<sup>13</sup>C NMR (126 MHz, CDCl<sub>3</sub>)** δ 197.1, 141.1, 135.2, 133.6, 132.5, 132.1, 130.7, 128.5, 128.2, 127.7, 127.6, 126.2, 125.9, 125.4, 124.7, 90.2, 82.9, 81.6, 53.9, 31.5, 28.6, 25.0, 24.9, 22.7, 19.3, 14.2.

**HRMS (ESI) m/z:** [M+Na]<sup>+</sup> Calcd for C<sub>33</sub>H<sub>39</sub>BO<sub>3</sub>Na<sup>+</sup> 517.2896; Found 517.2892.

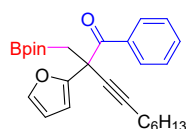

### 3-(Furan-2-yl)-1-phenyl-3-(4,4,5,5-tetramethyl-1,3,2-dioxaborolan-2-yl)undec-4-yn-1-one (3ja)

The title compound was prepared from 2-(dec-1-en-3-yn-2-yl)furan (60.7 mg, 0.3 mmol), Bis(pinacolato)diboron (114.3 mg, 0.45 mmol) and benzoyl chloride (84 mg, 0.6 mmol). The crude residue was purified by flash chromatography (petroleum ether / ethyl acetate = 100:1, R<sub>f</sub> = 0.75) to afford the products as a yellow liquid (general procedure: 49.5 mg, 38%).

**<sup>1</sup>H NMR (500 MHz, CDCl<sub>3</sub>)** δ 8.02 (d, *J* = 7.7 Hz, 2H), 7.42 (t, *J* = 7.5 Hz, 1H), 7.30 (t, *J* = 7.7 Hz, 3H), 6.43 (d, *J* = 3.2 Hz, 1H), 6.32 - 6.28 (m, 1H), 2.22 (t, *J* = 6.9 Hz, 2H), 1.86 (d, *J* = 15.2 Hz, 1H), 1.54 (d, *J* = 15.2 Hz, 1H), 1.45 (dd, *J* = 14.1, 7.1 Hz, 2H), 1.33 - 1.28 (m, 4H), 1.23 (d, *J* = 6.9 Hz, 12H), 0.88 - 0.83 (m, 3H).

$^{13}\text{C}$  NMR (126 MHz,  $\text{CDCl}_3$ )  $\delta$  194.9, 155.6, 142.2, 135.6, 132.2, 130.0, 127.7, 110.7, 106.9, 87.8, 83.1, 79.9, 49.0, 31.5, 28.5, 28.5, 24.9, 24.9, 22.7, 19.1, 14.2.

HRMS (ESI)  $m/z$ :  $[\text{M}+\text{Na}]^+$  Calcd for  $\text{C}_{27}\text{H}_{35}\text{BO}_3\text{SNa}^+$  473.2292; Found 473.2285.

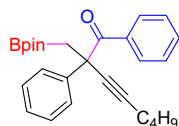

### 1,3-Diphenyl-3-(4,4,5,5-tetramethyl-1,3,2-dioxaborolan-2-yl)non-4-yn-1-one (3ka)

The title compound was prepared from oct-1-en-3-yn-2-ylbenzene (55.3 mg, 0.3 mmol), Bis(pinacolato)diboron (114.3 mg, 0.45 mmol) and benzoyl chloride (84 mg, 0.6 mmol). The crude residue was purified by flash chromatography (petroleum ether / ethyl acetate = 100:1,  $R_f$  = 0.75) to afford the products as a yellow liquid (general procedure: 78.7 mg, 63%).

$^1\text{H}$  NMR (500 MHz,  $\text{CDCl}_3$ )  $\delta$  7.86 (d,  $J$  = 7.5 Hz, 2H), 7.53 (d,  $J$  = 7.5 Hz, 2H), 7.35 (t,  $J$  = 7.4 Hz, 1H), 7.28 (t,  $J$  = 7.7 Hz, 2H), 7.21 (dd,  $J$  = 13.9, 6.4 Hz, 3H), 2.24 (t,  $J$  = 6.9 Hz, 2H), 1.73 (d,  $J$  = 15.2 Hz, 1H), 1.51 (d,  $J$  = 15.2 Hz, 1H), 1.46 - 1.40 (m, 2H), 1.34 - 1.30 (m, 2H), 1.20 (d,  $J$  = 11.8 Hz, 12H), 0.82 (t,  $J$  = 7.3 Hz, 3H).

$^{13}\text{C}$  NMR (126 MHz,  $\text{CDCl}_3$ )  $\delta$  197.2, 143.5, 135.3, 132.0, 130.7, 128.7, 127.6, 127.0, 126.6, 90.0, 82.9, 81.5, 53.7, 30.7, 25.0, 24.9, 21.9, 18.9, 13.7.

HRMS (ESI)  $m/z$ :  $[\text{M}+\text{Na}]^+$  Calcd for  $\text{C}_{27}\text{H}_{33}\text{BO}_3\text{Na}^+$  439.2423; Found 439.2413.

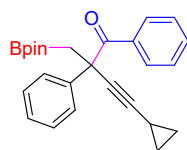

### 5-Cyclopropyl-1,3-diphenyl-3-(4,4,5,5-tetramethyl-1,3,2-dioxaborolan-2-yl)pent-4-yn-1-one (3la)

The title compound was prepared from (4-cyclopropylbut-1-en-3-yn-2-yl)benzene (50.5 mg, 0.3 mmol), Bis(pinacolato)diboron (114.3 mg, 0.45 mmol) and benzoyl chloride (84 mg, 0.6 mmol). The crude residue was purified by flash chromatography (petroleum ether / ethyl acetate = 100:1,  $R_f$  = 0.75) to afford the products as a yellow liquid (general procedure: 60.0 mg, 50%).

$^1\text{H}$  NMR (500 MHz,  $\text{CDCl}_3$ )  $\delta$  7.85 (d,  $J$  = 7.5 Hz, 2H), 7.50 (d,  $J$  = 7.6 Hz, 2H), 7.35 (t,  $J$  = 7.3 Hz, 1H), 7.28 (d,  $J$  = 7.5 Hz, 2H), 7.24 - 7.17 (m, 3H), 1.72 (d,  $J$  = 15.2 Hz, 1H), 1.48 (d,  $J$  = 15.2 Hz, 1H), 1.29 - 1.18 (m, 13H), 0.71 (dt,  $J$  = 6.1, 3.7 Hz, 2H), 0.61 (dt,  $J$  = 6.7, 3.9 Hz, 2H).

$^{13}\text{C}$  NMR (126 MHz,  $\text{CDCl}_3$ )  $\delta$  197.0, 143.4, 135.2, 132.0, 130.6, 128.7, 127.6, 127.0, 126.5, 93.0, 82.9, 76.3, 53.6, 25.0, 24.9, 8.1, 0.1.

HRMS (ESI)  $m/z$ :  $[\text{M}+\text{Na}]^+$  Calcd for  $\text{C}_{26}\text{H}_{29}\text{BO}_3\text{Na}^+$  423.2109; Found 423.2104.

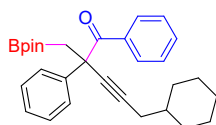

**6-Cyclohexyl-1,3-diphenyl-3-(4,4,5,5-tetramethyl-1,3,2-dioxaborolan-2-yl)hex-4-yn-1-one (3ma)**

The title compound was prepared from (4-cyclohexylbut-1-en-3-yn-2-yl)benzene (63.0 mg, 0.3 mmol), Bis(pinacolato)diboron (114.3 mg, 0.45 mmol) and benzoyl chloride (84 mg, 0.6 mmol). The crude residue was purified by flash chromatography (petroleum ether / ethyl acetate = 100:1, R<sub>f</sub> = 0.75) to afford the products as a yellow liquid (general procedure: 60.2 mg, 44%).

<sup>1</sup>H NMR (500 MHz, CDCl<sub>3</sub>) δ 7.84 (d, *J* = 7.6 Hz, 2H), 7.54 (d, *J* = 7.5 Hz, 2H), 7.34 (t, *J* = 7.4 Hz, 1H), 7.29 (t, *J* = 7.7 Hz, 2H), 7.22 (t, *J* = 7.8 Hz, 3H), 2.13 (d, *J* = 6.5 Hz, 2H), 1.73 (d, *J* = 15.3 Hz, 1H), 1.69 - 1.56 (m, 6H), 1.53 (d, *J* = 15.3 Hz, 1H), 1.20 (d, *J* = 12.3 Hz, 12H), 0.96 - 0.82 (m, 3H).

<sup>13</sup>C NMR (126 MHz, CDCl<sub>3</sub>) δ 197.3, 143.5, 135.4, 132.0, 130.6, 128.7, 127.6, 127.0, 126.6, 126.3, 88.9, 82.9, 82.2, 78.0, 53.9, 53.8, 37.5, 32.6, 27.1, 26.3, 25.0, 24.9.

HRMS (ESI) m/z: [M+Na]<sup>+</sup> Calcd for C<sub>30</sub>H<sub>37</sub>BO<sub>3</sub>Na<sup>+</sup> 479.2738; Found 479.2730.

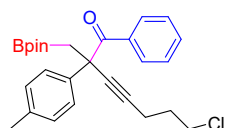

**8-Chloro-1-phenyl-3-(4,4,5,5-tetramethyl-1,3,2-dioxaborolan-2-yl)-3-(p-tolyl)oct-4-yn-1-one (3na)**

The title compound was prepared from 1-(7-chlorohept-1-en-3-yn-2-yl)-4-methylbenzene (65.6 mg, 0.3 mmol), Bis(pinacolato)diboron (114.3 mg, 0.45 mmol) and benzoyl chloride (84 mg, 0.6 mmol). The crude residue was purified by flash chromatography (petroleum ether / ethyl acetate = 100:1, R<sub>f</sub> = 0.75) to afford the products as a yellow liquid (general procedure: 67.6 mg, 50%).

<sup>1</sup>H NMR (500 MHz, CDCl<sub>3</sub>) δ 7.87 - 7.79 (m, 2H), 7.39 (d, *J* = 8.2 Hz, 2H), 7.36 (d, *J* = 7.4 Hz, 1H), 7.23 (d, *J* = 7.5 Hz, 2H), 7.10 (d, *J* = 8.0 Hz, 2H), 3.58 - 3.46 (m, 2H), 2.43 (dd, *J* = 13.0, 6.7 Hz, 2H), 2.30 (s, 3H), 1.9 - 1.83 (m, 2H), 1.70 (d, *J* = 15.3 Hz, 1H), 1.48 (d, *J* = 15.3 Hz, 1H), 1.22 (d, *J* = 17.4 Hz, 12H).

<sup>13</sup>C NMR (126 MHz, CDCl<sub>3</sub>) δ 197.2, 140.2, 136.7, 135.3, 132.1, 130.5, 129.6, 127.7, 126.3, 87.5, 83.0, 82.9, 53.5, 43.7, 31.4, 25.0, 24.8, 21.1, 16.6.

HRMS (ESI) m/z: [M+Na]<sup>+</sup> Calcd for C<sub>27</sub>H<sub>32</sub>BClO<sub>3</sub>Na<sup>+</sup> 473.2037; Found 473.2028.

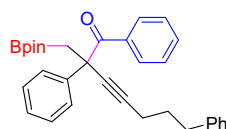

**1,3,8-Triphenyl-3-(4,4,5,5-tetramethyl-1,3,2-dioxaborolan-2-yl)oct-4-yn-1-one (3oa)**

The title compound was prepared from hept-6-en-4-yne-1,6-diyl dibenzene (49.3 mg, 0.3 mmol), Bis(pinacolato)diboron (114.3 mg, 0.45 mmol) and benzoyl chloride (84 mg, 0.6 mmol). The crude residue was purified by flash chromatography (petroleum ether / ethyl acetate = 100:1, R<sub>f</sub> = 0.75) to afford the products as a yellow liquid (general procedure: 74.6 mg, 52%).

<sup>1</sup>H NMR (500 MHz, CDCl<sub>3</sub>) δ 7.89 (dd, *J* = 8.4, 1.2 Hz, 2H), 7.56 (dd, *J* = 8.3, 1.1 Hz, 2H), 7.37-7.34 (m, 1H), 7.31 (t, *J* = 7.7 Hz, 2H), 7.25 - 7.20 (m, 5H), 7.17 (d, *J* = 7.3 Hz, 1H), 7.07 - 7.03 (m,

2H), 2.63 (dd,  $J = 13.6, 7.1$  Hz, 2H), 2.26 (td,  $J = 6.9, 1.4$  Hz, 2H), 1.78 (dd,  $J = 8.7, 5.0$  Hz, 2H), 1.75 (d,  $J = 4.1$  Hz, 1H), 1.56 (d,  $J = 15.3$  Hz, 1H), 1.20 (d,  $J = 11.2$  Hz, 12H).  
 $^{13}\text{C}$  NMR (126 MHz,  $\text{CDCl}_3$ )  $\delta$  197.1, 143.5, 141.9, 135.2, 132.1, 130.7, 128.8, 128.7, 128.4, 127.7, 127.0, 126.5, 125.9, 89.5, 83.0, 82.1, 53.8, 34.6, 30.3, 25.0, 24.8, 18.5, 18.2.  
 HRMS (ESI)  $m/z$ :  $[\text{M}+\text{Na}]^+$  Calcd for  $\text{C}_{32}\text{H}_{35}\text{BO}_3\text{Na}^+$  501.2583; Found 501.2075.

## 6. Scale-up syntheses and further transformations

### 6.1 Scale-up reaction

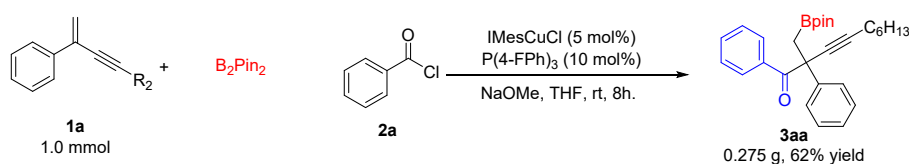

In a nitrogen-filled glove box, a 15 mL Schlenk tube equipped with magnetic stir bar was charged with **1a** (212.0 mg, 1.0 mmol, 1.0 eq.),  $\text{B}_2\text{Pin}_2$  (381 mg, 1.5 mmol, 1.5 eq.), **2a** (281 mg, 2.0 mmol, 2.0 eq.),  $\text{IMesCuCl}$  (20 mg, 0.05 mmol, 0.05 eq.),  $\text{P}(4\text{-FPh})_3$  (32 mg, 0.1 mmol, 0.1 eq.),  $\text{NaOMe}$  (162 mg, 3 mmol, 3.0 eq.). THF (2 mL) was added to the reaction tube. and the Schlenk tube was sealed quickly, removed from the glove box. The reaction mixture was stirred at room temperature for 10 hours. Then the solution was extracted with EtOAc. The combined organic phase was dried over  $\text{Na}_2\text{SO}_4$  and concentrated under reduced pressure. The residue was purified by flash chromatography on silica gel diluting with petroleum ether/EtOAc ( $v/v = 100:1$ ) to afford the products **3aa** (0.275 g, 62% yield).

### 5.2 Further transformations

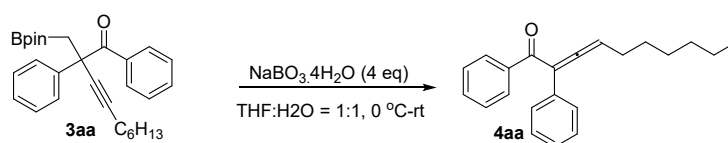

**3aa** (0.3 mmol),  $\text{NaBO}_3 \cdot 4\text{H}_2\text{O}$  (4.0 eq.) were transferred into an 15 mL tube under  $\text{N}_2$  atmosphere.  $\text{THF}/\text{H}_2\text{O} = 1:1$  (2 mL) was added to the reaction tube. The reaction mixture was stirred at room temperature for 10 hours. Then the solution was extracted with EtOAc. The combined organic phase was dried over  $\text{Na}_2\text{SO}_4$  and concentrated under reduced pressure. The residue was purified by flash chromatography on silica gel diluting with petroleum ether/EtOAc ( $v/v = 100:1$ ,  $R_f = 0.65$ ) to afford the products **4aa** as a dark yellow oily liquid (63.8 mg, 70%).

$^1\text{H}$  NMR (500 MHz,  $\text{CDCl}_3$ )  $\delta$  7.92 (d,  $J = 7.2$  Hz, 2H), 7.55 (t,  $J = 7.4$  Hz, 1H), 7.48 (d,  $J = 7.5$  Hz, 2H), 7.44 (t,  $J = 7.7$  Hz, 2H), 7.37 (t,  $J = 7.6$  Hz, 2H), 7.30 (d,  $J = 7.4$  Hz, 1H), 5.70 (t,  $J = 7.2$  Hz, 1H), 2.18 (dt,  $J = 14.8, 7.4$  Hz, 2H), 1.29 - 1.19 (m, 8H), 0.85 (t,  $J = 6.7$  Hz, 3H).

$^{13}\text{C}$  NMR (126 MHz,  $\text{CDCl}_3$ )  $\delta$  211.2, 194.3, 138.7, 133.8, 132.7, 129.5, 128.6, 128.2, 128.2, 127.6, 109.0, 97.5, 31.7, 29.1, 28.8, 28.6, 22.7, 14.2.

HRMS (ESI)  $m/z$ :  $[\text{M}+\text{Na}]^+$  Calcd for  $\text{C}_{22}\text{H}_{24}\text{ONa}^+$  327.1719; Found 327.1729.

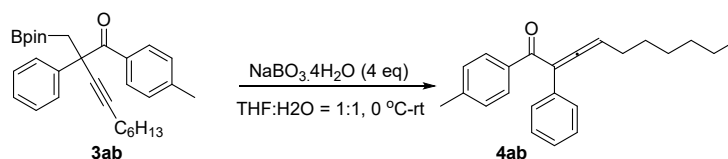

Compound **4ab** was prepared **3ab** (137.5 mg, 0.3 mmol). The crude residue was purified by flash chromatography (petroleum ether / ethyl acetate = 100:1,  $R_f$  = 0.65) to afford the products as a dark yellow oily liquid (51.2 mg, 55%).

**$^1\text{H}$  NMR (500 MHz,  $\text{CDCl}_3$ )**  $\delta$  7.87 (d,  $J$  = 8.1 Hz, 2H), 7.48 (d,  $J$  = 7.6 Hz, 2H), 7.38 (t,  $J$  = 7.7 Hz, 2H), 7.32 - 7.28 (m, 1H), 7.26 (d,  $J$  = 8.0 Hz, 2H), 5.71 (t,  $J$  = 7.2 Hz, 1H), 2.44 (s, 3H), 2.21 (dt,  $J$  = 14.6, 7.3 Hz, 2H), 1.44 (dd,  $J$  = 14.3, 7.1 Hz, 2H), 1.31 - 1.21 (m, 6H), 0.88 (t,  $J$  = 6.6 Hz, 3H).

**$^{13}\text{C}$  NMR (126 MHz,  $\text{CDCl}_3$ )**  $\delta$  209.8, 184.9, 144.1, 134.0, 133.9, 133.6, 128.6, 128.1, 127.8, 127.7, 109.2, 98.2, 31.6, 29.0, 28.9, 28.9, 22.7, 14.2.

**HRMS (ESI)  $m/z$ :**  $[\text{M}+\text{Na}]^+$  Calcd for  $\text{C}_{23}\text{H}_{26}\text{ONa}^+$  341.1876; Found 341.1877.

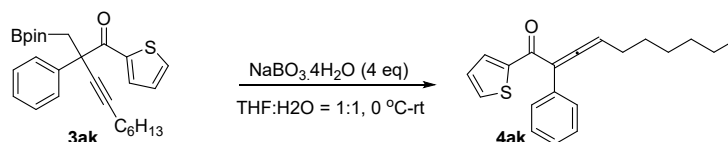

Compound **4ak** was prepared **3ak** (135.0 mg, 0.3 mmol). The crude residue was purified by flash chromatography (petroleum ether / ethyl acetate = 100:1,  $R_f$  = 0.65) to afford the products as a dark yellow oily liquid (51.2 mg, 55%).

**$^1\text{H}$  NMR (500 MHz,  $\text{CDCl}_3$ )**  $\delta$  7.87 (d,  $J$  = 3.0 Hz, 1H), 7.67 (d,  $J$  = 4.9 Hz, 1H), 7.49 (d,  $J$  = 7.4 Hz, 2H), 7.38 (t,  $J$  = 7.6 Hz, 2H), 7.33 - 7.27 (m, 1H), 7.16 - 7.12 (m, 1H), 5.87 (t,  $J$  = 7.2 Hz, 1H), 2.30 (ddd,  $J$  = 14.5, 7.3, 4.1 Hz, 2H), 1.56 - 1.50 (m, 2H), 1.35 (dd,  $J$  = 13.6, 7.9 Hz, 2H), 1.30 - 1.26 (m, 4H), 0.88 (t,  $J$  = 6.8 Hz, 3H).

**$^{13}\text{C}$  NMR (126 MHz,  $\text{CDCl}_3$ )**  $\delta$  209.8, 184.9, 144.1, 134.0, 133.9, 133.6, 128.6, 128.1, 127.8, 127.7, 109.2, 98.2, 31.6, 29.0, 28.9, 28.9, 22.7, 14.2.

**HRMS (ESI)  $m/z$ :**  $[\text{M}+\text{Na}]^+$  Calcd for  $\text{C}_{20}\text{H}_{22}\text{OSNa}^+$  333.1284; Found 333.1284.

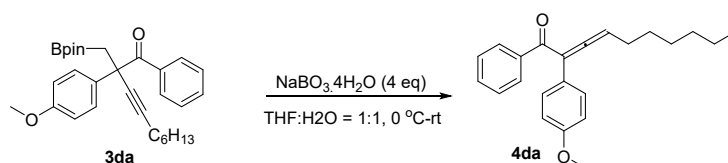

Compound **4da** was prepared **3da** (137.5 mg, 0.3 mmol). The crude residue was purified by flash chromatography (petroleum ether / ethyl acetate = 100:1,  $R_f$  = 0.65) to afford the products as a dark yellow oily liquid (64.0 mg, 45%).

**$^1\text{H}$  NMR (500 MHz,  $\text{CDCl}_3$ )**  $\delta$  7.85 (d,  $J$  = 8.1 Hz, 2H), 7.48 - 7.45 (m, 2H), 7.36 (dd,  $J$  = 10.4, 4.8 Hz, 2H), 7.28 (d,  $J$  = 7.4 Hz, 1H), 7.24 (d,  $J$  = 8.0 Hz, 2H), 5.69 (t,  $J$  = 7.2 Hz, 1H), 2.42 (s, 3H), 2.19 (dt,  $J$  = 14.6, 7.3 Hz, 2H), 1.27 (dd,  $J$  = 14.9, 11.0 Hz, 8H), 0.86 (t,  $J$  = 6.8 Hz, 4H).

**$^{13}\text{C}$  NMR (126 MHz,  $\text{CDCl}_3$ )**  $\delta$  210.4, 193.8, 143.6, 136.0, 134.0, 129.8, 129.0, 128.6, 128.1, 127.6, 108.9, 97.4, 31.7, 29.1, 28.9, 28.7, 22.7, 21.8, 14.2.

**HRMS (ESI)  $m/z$ :**  $[\text{M}+\text{Na}]^+$  Calcd for  $\text{C}_{23}\text{H}_{26}\text{O}_2\text{Na}^+$  357.1825; Found 357.1832.

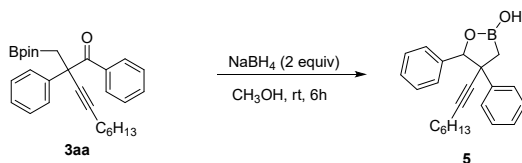

**3aa** (0.3 mmol), NaBH<sub>4</sub> (2 eq.) were transferred into an 15 mL tube under N<sub>2</sub> atmosphere. CH<sub>3</sub>OH (2 mL) was added to the reaction tube. The reaction mixture was stirred at room temperature for 6 hours. Then the solution was extracted with EtOAc. The combined organic phase was dried over Na<sub>2</sub>SO<sub>4</sub> and concentrated under reduced pressure. The residue was purified by flash chromatography on silica gel diluting with petroleum ether/EtOAc (v/v = 100:1, R<sub>f</sub> = 0.2) to afford the products **5** as a yellow oily liquid (72.7 mg, 70%).

**<sup>1</sup>H NMR (500 MHz, CDCl<sub>3</sub>)** δ 7.13 - 6.99 (m, 8H), 6.93 (d, *J* = 7.3 Hz, 2H), 5.54 (s, 1H), 4.95 (s, 1H), 2.33 (t, *J* = 7.0 Hz, 2H), 1.90 (q, *J* = 16.7 Hz, 2H), 1.65 - 1.56 (m, 2H), 1.48 (dt, *J* = 14.4, 7.1 Hz, 2H), 1.35 (dd, *J* = 7.1, 3.6 Hz, 4H), 0.92 (t, *J* = 6.9 Hz, 2H).

**<sup>13</sup>C NMR (126 MHz, CDCl<sub>3</sub>)** δ 140.6, 138.0, 127.5, 127.5, 127.4, 127.4, 126.6, 126.0, 90.3, 85.0, 84.4, 60.6, 51.0, 31.5, 29.1, 28.8, 22.8, 19.0, 14.2.

**HRMS (ESI) m/z:** [M+Na]<sup>+</sup> Calcd for C<sub>23</sub>H<sub>27</sub>BO<sub>2</sub>Na<sup>+</sup> 369.1996; Found 369.2006.

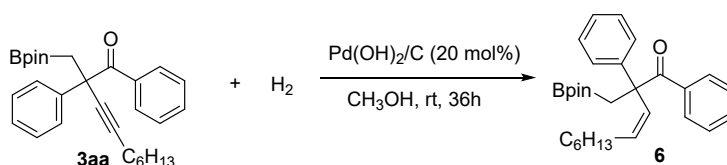

**3aa** (0.3 mmol), Pd(OH)<sub>2</sub>/C (0.06 mmol) were transferred into an 15 mL tube under H<sub>2</sub> atmosphere. CH<sub>3</sub>OH (2 mL) was added to the reaction tube. The reaction mixture was stirred at room temperature for 36 hours. Then the solution was extracted with EtOAc. The combined organic phase was dried over Na<sub>2</sub>SO<sub>4</sub> and concentrated under reduced pressure. The residue was purified by flash chromatography on silica gel diluting with petroleum ether/EtOAc (v/v = 100:1, R<sub>f</sub> = 0.5) to afford the products **6** as a yellow oily liquid (79.6 mg, 60%).

**<sup>1</sup>H NMR (500 MHz, CDCl<sub>3</sub>)** δ 7.67 - 7.62 (m, 2H), 7.44 (d, *J* = 7.4 Hz, 2H), 7.34 (t, *J* = 7.4 Hz, 1H), 7.29 (d, *J* = 7.5 Hz, 2H), 7.21 (dd, *J* = 14.8, 7.2 Hz, 3H), 6.53 (dt, *J* = 11.7, 1.6 Hz, 1H), 5.44 (dt, *J* = 11.7, 7.5 Hz, 1H), 1.77 (dd, *J* = 34.8, 15.5 Hz, 3H), 1.32 (d, *J* = 24.4 Hz, 1H), 1.28 - 1.23 (m, 2H), 1.20 - 1.15 (m, 2H), 1.11 (d, *J* = 1.2 Hz, 14H), 0.82 (t, *J* = 7.2 Hz, 3H).

**<sup>13</sup>C NMR (126 MHz, CDCl<sub>3</sub>)** δ 202.3, 144.1, 136.4, 133.1, 132.6, 131.3, 130.2, 128.3, 127.5, 127.5, 126.4, 82.8, 57.8, 31.7, 29.0, 28.8, 28.5, 24.8, 24.6, 22.5, 14.1.

**HRMS (ESI) m/z:** [M+Na]<sup>+</sup> Calcd for C<sub>29</sub>H<sub>39</sub>BO<sub>3</sub>Na<sup>+</sup> 469.2884; Found 469.2890.

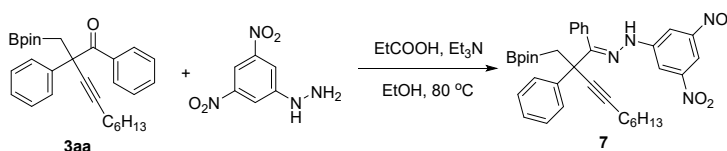

**3aa** (0.3 mmol), (3,5-dinitrophenyl)hydrazine (0.4 mmol), Et<sub>3</sub>N (0.2 mL) and EtCOOH (0.2 mL) were transferred into an 15 mL tube under N<sub>2</sub> atmosphere. EtOH (2 mL) was added to the reaction tube. The reaction mixture was stirred at 80 °C for 12 hours. Then the solution was extracted with EtOAc. The combined organic phase was dried over Na<sub>2</sub>SO<sub>4</sub> and concentrated

under reduced pressure. The residue was purified by flash chromatography on silica gel diluting with petroleum ether/EtOAc (v/v = 100:1, R<sub>f</sub> = 0.5) to afford the products **7** as a yellow oily liquid (84.3 mg, 45%).

**<sup>1</sup>H NMR (500 MHz, CDCl<sub>3</sub>)** δ 10.74 (s, 1H), 9.05 (d, *J* = 2.5 Hz, 1H), 8.35 (dd, *J* = 9.6, 2.5 Hz, 1H), 8.26 (d, *J* = 9.6 Hz, 1H), 7.62 - 7.57 (m, 2H), 7.42 (t, *J* = 7.4 Hz, 1H), 7.39 - 7.29 (m, 5H), 7.26 (dd, *J* = 9.6, 4.9 Hz, 2H), 2.21 (dd, *J* = 14.5, 7.4 Hz, 3H), 1.80 (d, *J* = 15.3 Hz, 1H), 1.45 (dd, *J* = 14.1, 7.1 Hz, 2H), 1.36 - 1.26 (m, 6H), 1.18 (d, *J* = 16.0 Hz, 12H), 0.90 (t, *J* = 7.0 Hz, 3H).

**<sup>13</sup>C NMR (126 MHz, CDCl<sub>3</sub>)** δ 161.5, 145.1, 142.3, 137.9, 132.5, 130.0, 129.7, 128.9, 128.3, 127.4, 127.2, 123.5, 117.1, 88.8, 83.1, 80.8, 50.0, 31.5, 28.7, 28.6, 25.3, 24.6, 22.7, 19.0, 14.3.

**HRMS (ESI) m/z:** [M+Na]<sup>+</sup> Calcd for C<sub>35</sub>H<sub>41</sub>BN<sub>4</sub>O<sub>6</sub>Na<sup>+</sup> 647.3011; Found 647.3020.

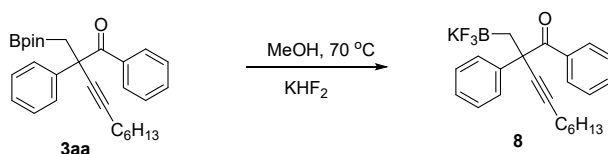

**3aa** (0.3 mmol), KHF<sub>2</sub> (7 eq.) were transferred into an 15 mL tube under N<sub>2</sub> atmosphere. MeOH (2 mL) was added to the reaction tube. The reaction mixture was stirred at 70 °C for 14 hours. After the reaction was completed, it was cooled to room temperature, concentrated, and the remaining solid was washed with hexane : ether for 15 minutes. After filtration, the solid was washed with ether to afford the products **8** as a white solid (70.0 mg, 55%).

**<sup>1</sup>H NMR (500 MHz, CDCl<sub>3</sub>)** δ 7.82 (d, *J* = 7.7 Hz, 2H), 7.51 (d, *J* = 7.5 Hz, 2H), 7.26 - 7.02 (m, 6H), 2.27 - 1.99 (m, 2H), 1.19 (dd, *J* = 66.8, 30.0 Hz, 10H), 0.80 (t, *J* = 6.9 Hz, 3H).

**<sup>13</sup>C NMR (126 MHz, CDCl<sub>3</sub>)** δ 200.2, 144.9, 136.1, 131.7, 130.7, 128.5, 127.4, 126.8, 126.4, 88.4, 83.6, 54.4, 32.9, 31.6, 28.8, 28.7, 22.7, 19.1, 14.2.

**<sup>19</sup>F NMR (471 MHz, CDCl<sub>3</sub>)** δ -134.3.

## 7. References

- S1. Zeng, Y.; Chiou, M.; Bao, H. *J. Am. Chem. Soc.* **2020**, *142*, 18014–18021.
- S2. Zhu, X.; Deng, W.; Chiou, M. F.; Ye, C.; Jian, W.; Zeng, Y.; Jiao, Y.; Ge, L.; Li, Y.; Zhang, X.; Bao, H. *J. Am. Chem. Soc.* **2019**, *141*, 548–559.
- S3. Yan, W.; Ye, X. h. Novruz, G. and Shi, X. D. *Org. Lett.* **2012**, *14*, 2358–2361.

## 8. Copies of NMR Spectra for Compounds

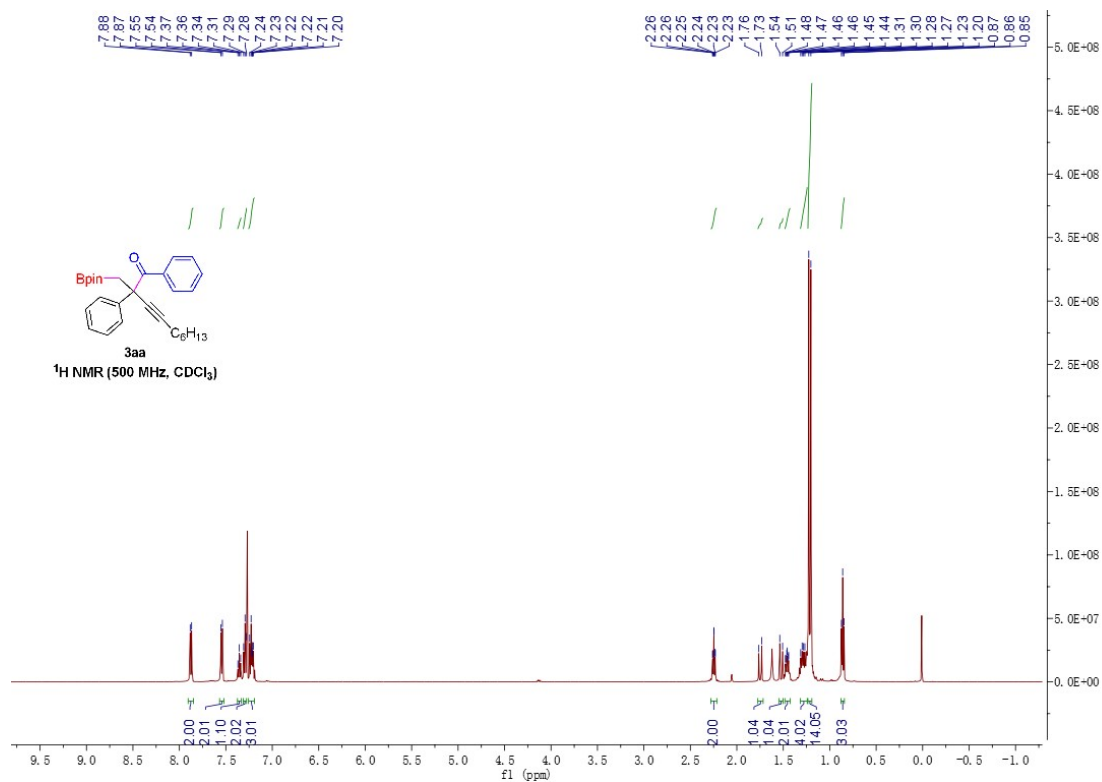

Figure S1. <sup>1</sup>H NMR (500 MHz, CDCl<sub>3</sub>) spectrum of 3aa

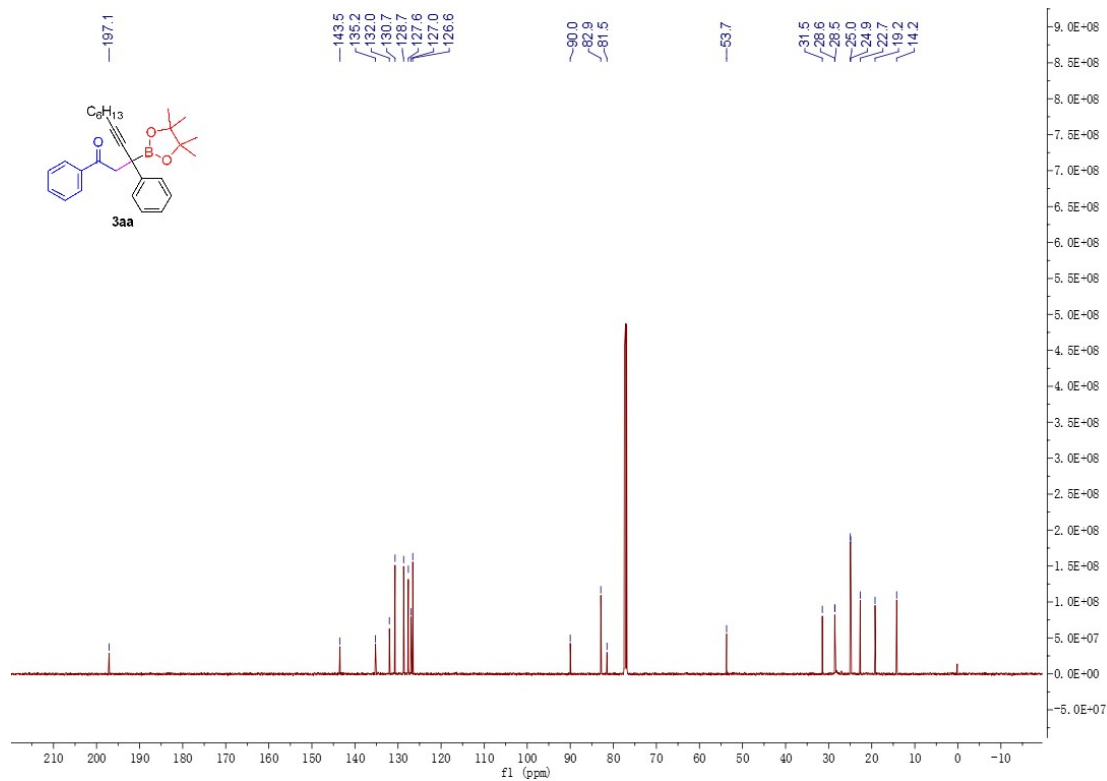

Figure S2. <sup>13</sup>C NMR (126 MHz, CDCl<sub>3</sub>) spectrum of 3aa



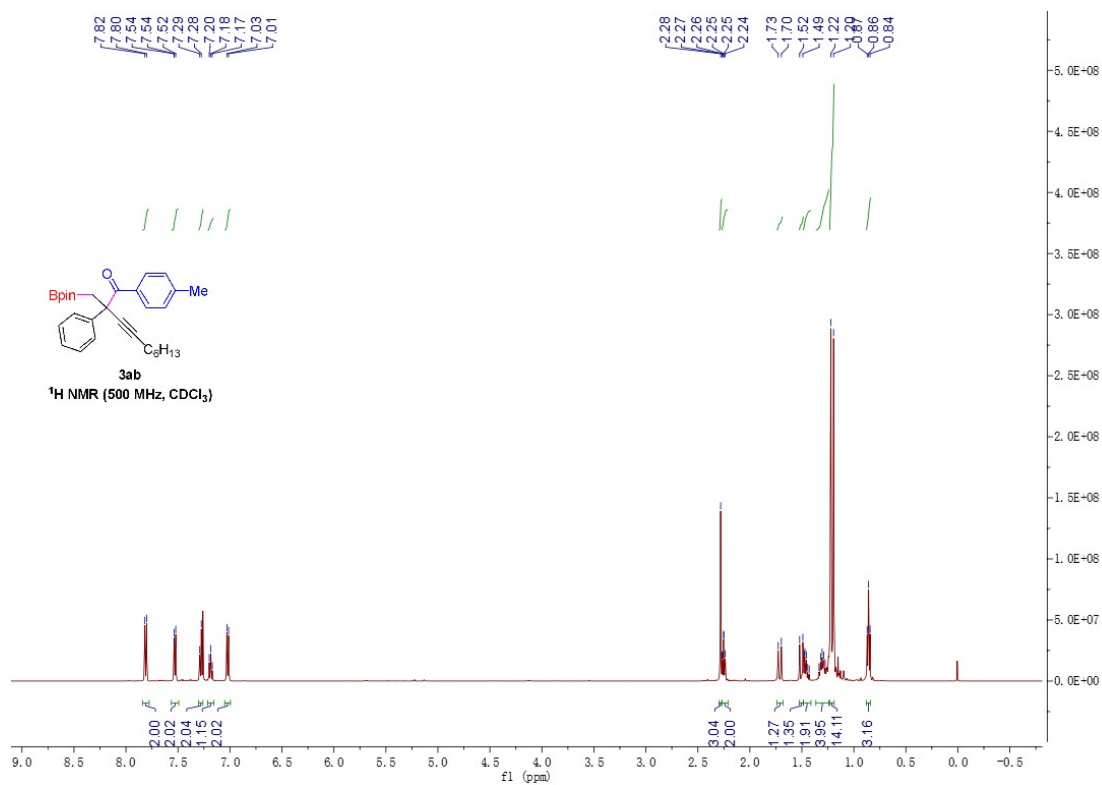

Figure S3. <sup>1</sup>H NMR (500 MHz, CDCl<sub>3</sub>) spectrum of 3ab

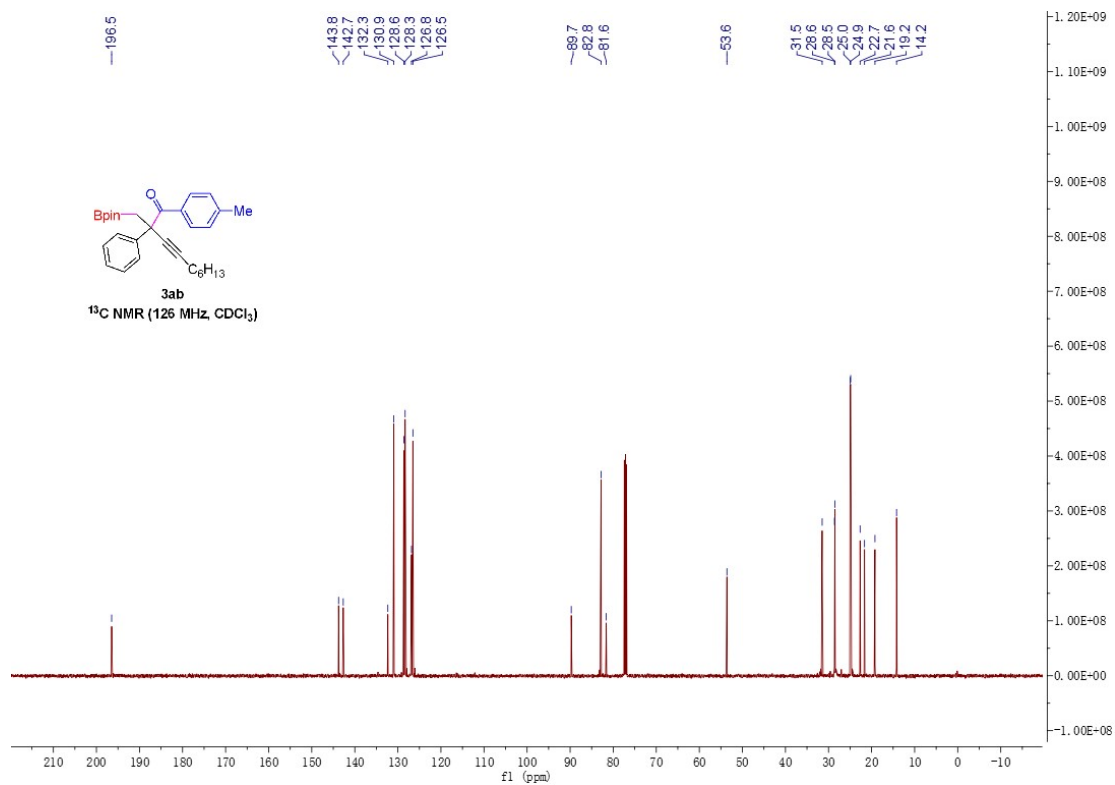

Figure S4. <sup>13</sup>C NMR (126 MHz, CDCl<sub>3</sub>) spectrum of 3ab

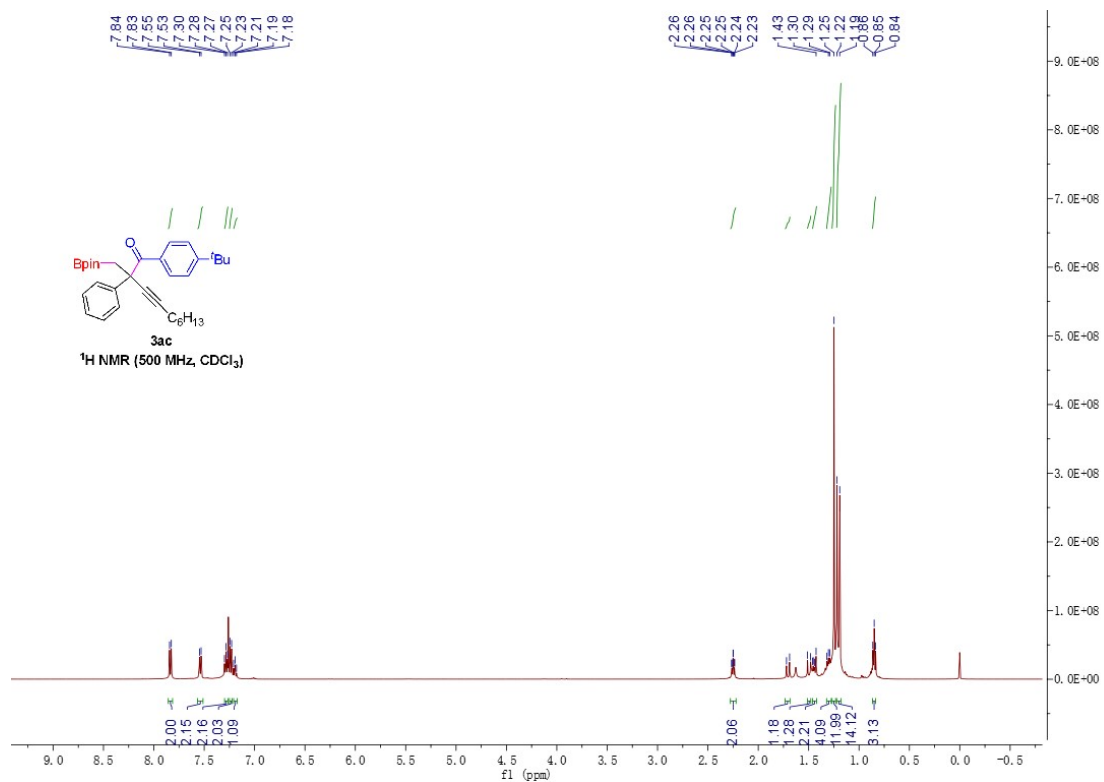

Figure S5. <sup>1</sup>H NMR (500 MHz, CDCl<sub>3</sub>) spectrum of **3ac**

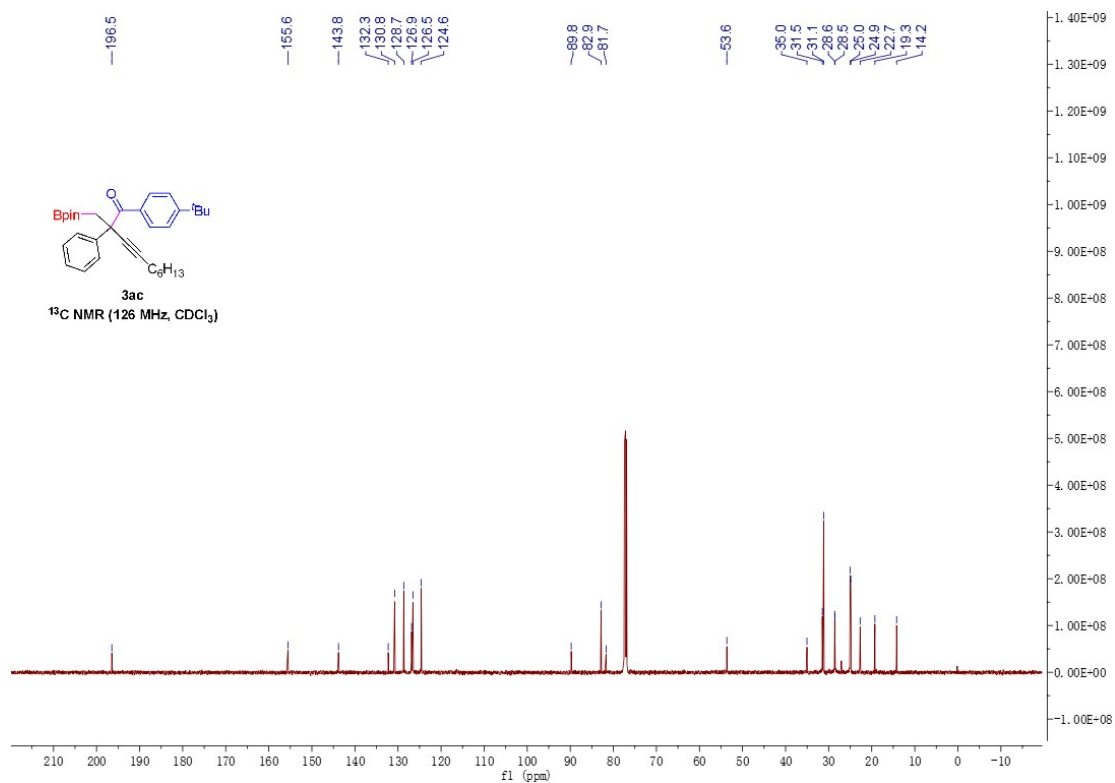

Figure S6. <sup>13</sup>C NMR (126 MHz, CDCl<sub>3</sub>) spectrum of **3ac**

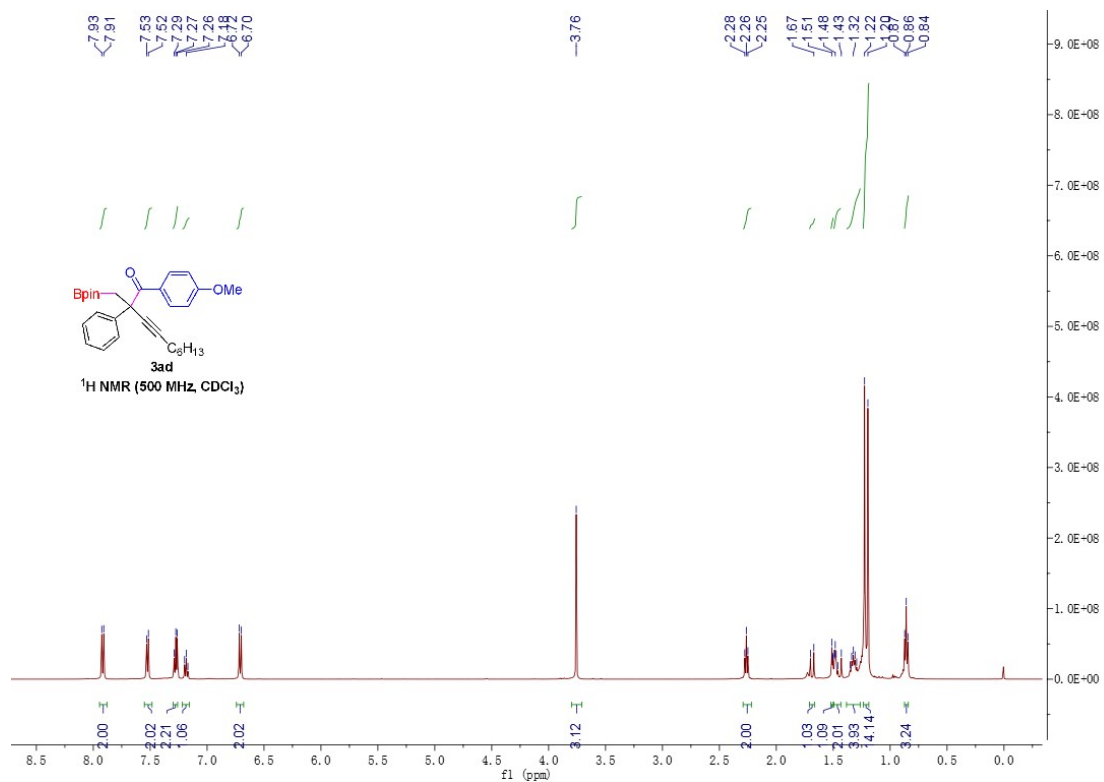

Figure S7. <sup>1</sup>H NMR (500 MHz, CDCl<sub>3</sub>) spectrum of 3ad

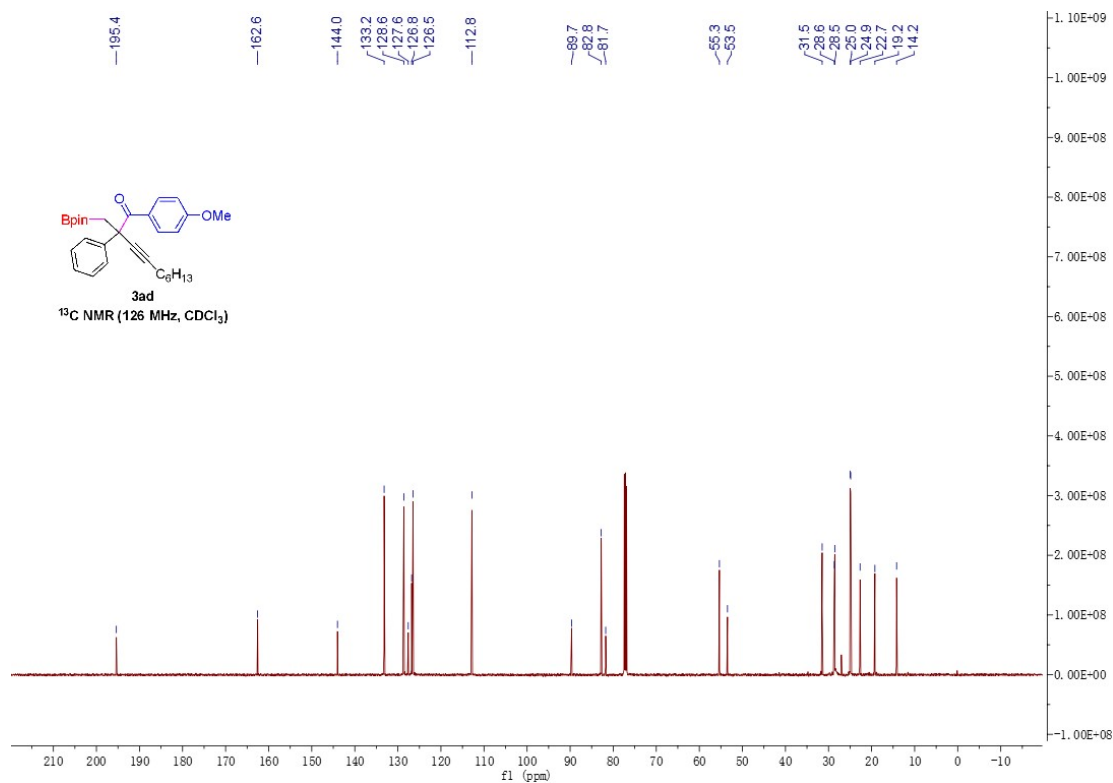

Figure S8. <sup>13</sup>C NMR (126 MHz, CDCl<sub>3</sub>) spectrum of 3ad

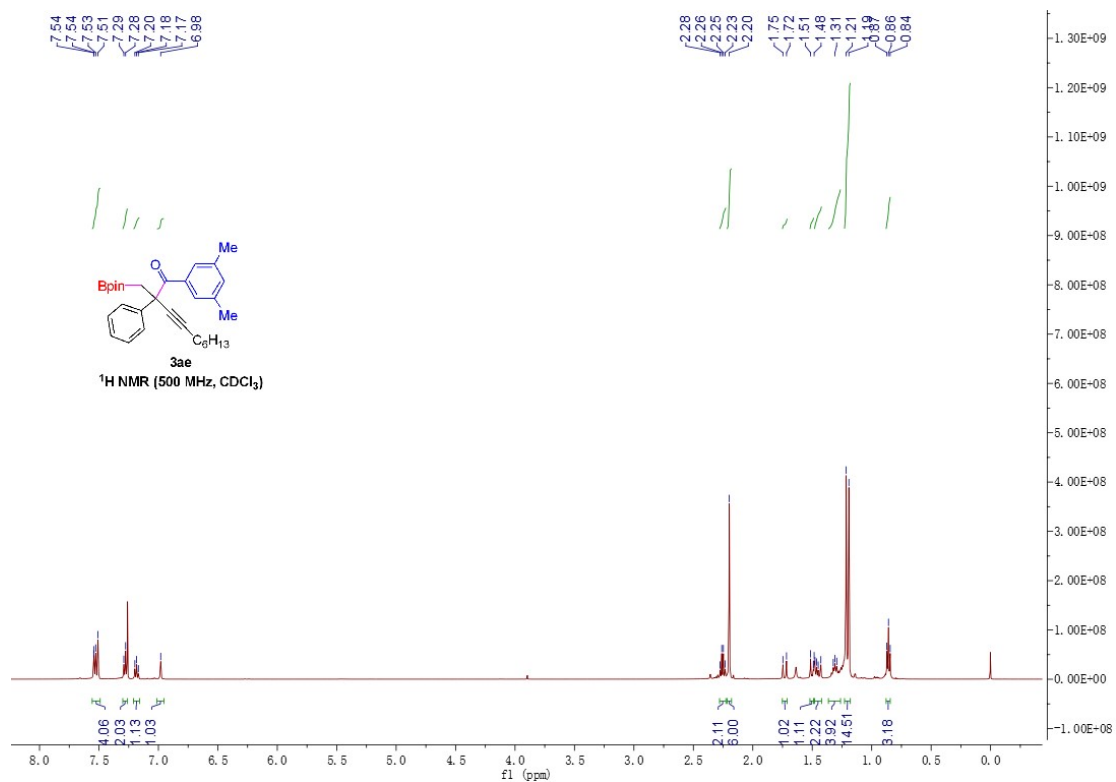

Figure S9. <sup>1</sup>H NMR (500 MHz, CDCl<sub>3</sub>) spectrum of 3ae

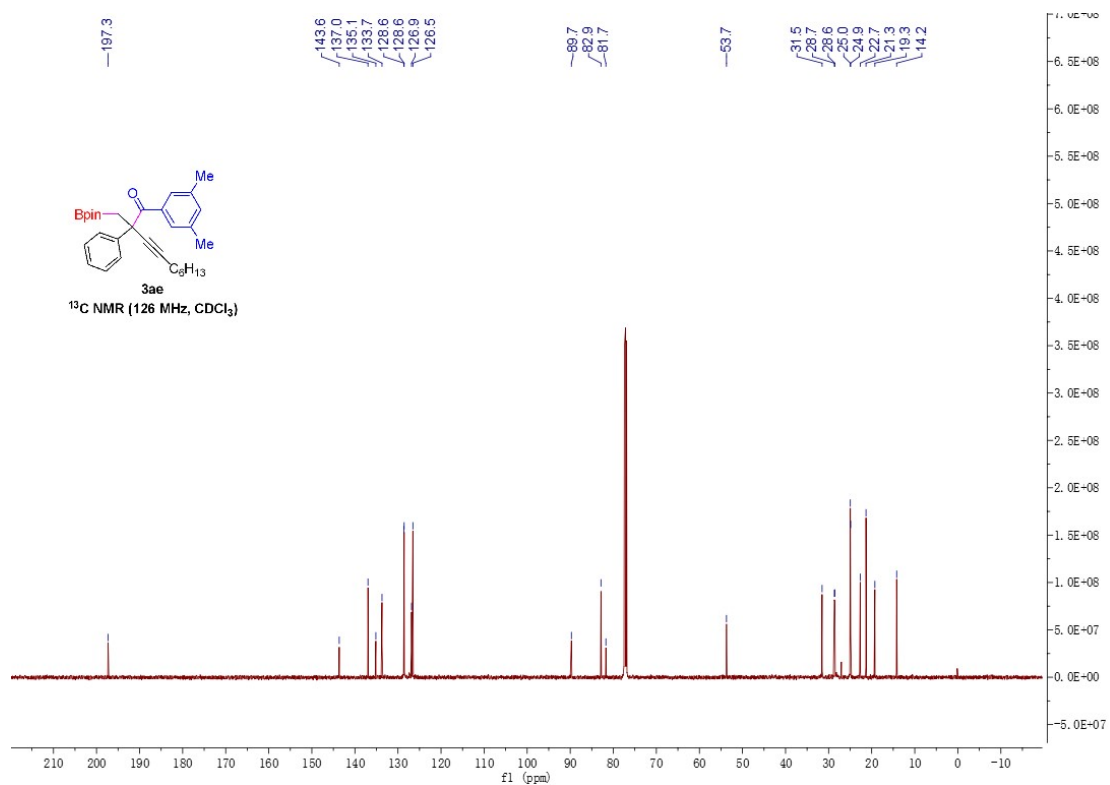

Figure S10. <sup>13</sup>C NMR (126 MHz, CDCl<sub>3</sub>) spectrum of 3ae

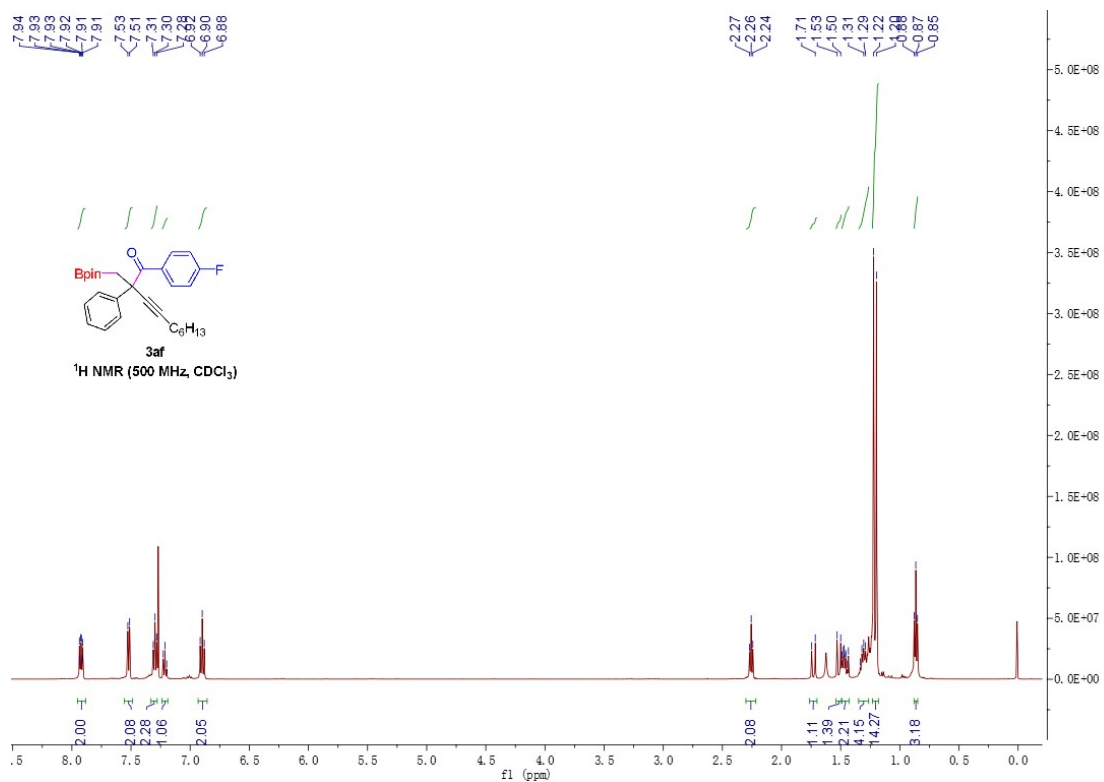

Figure S11. <sup>1</sup>H NMR (500 MHz, CDCl<sub>3</sub>) spectrum of 3af

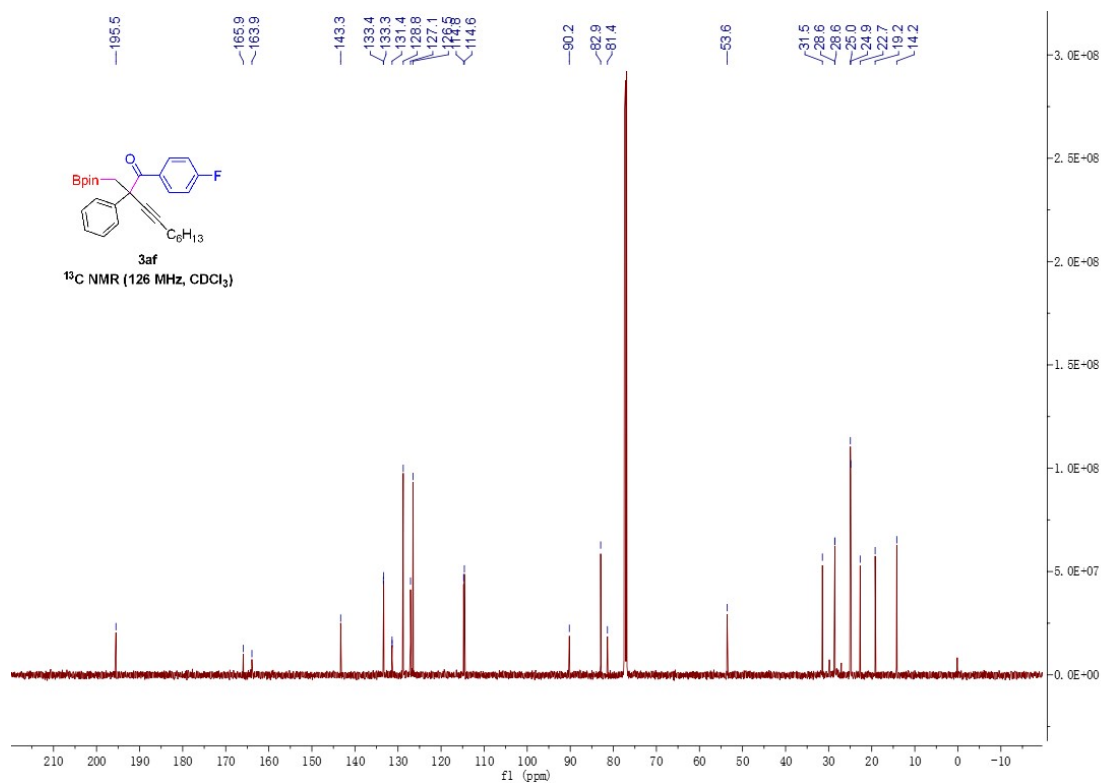

Figure S12. <sup>13</sup>C NMR (126 MHz, CDCl<sub>3</sub>) spectrum of 3af

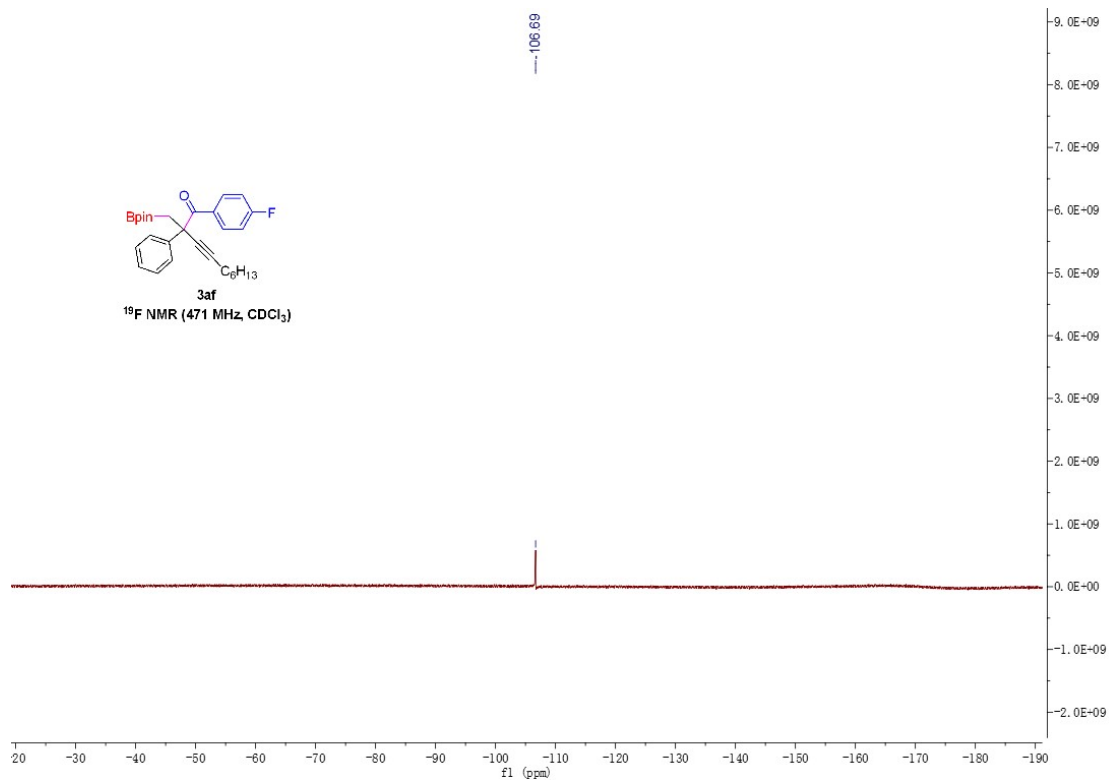

Figure S13.  $^{19}\text{F}$  NMR (471 MHz,  $\text{CDCl}_3$ ) spectrum of **3af**

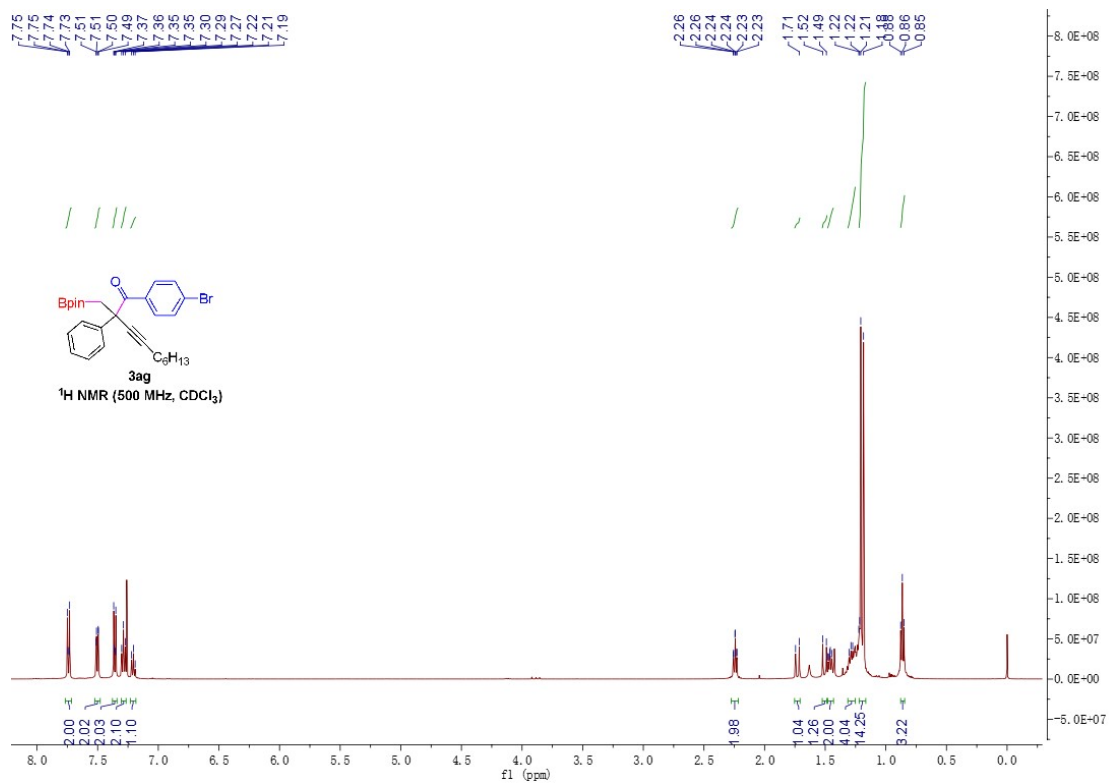

Figure S14.  $^1\text{H}$  NMR (500 MHz,  $\text{CDCl}_3$ ) spectrum of **3ag**

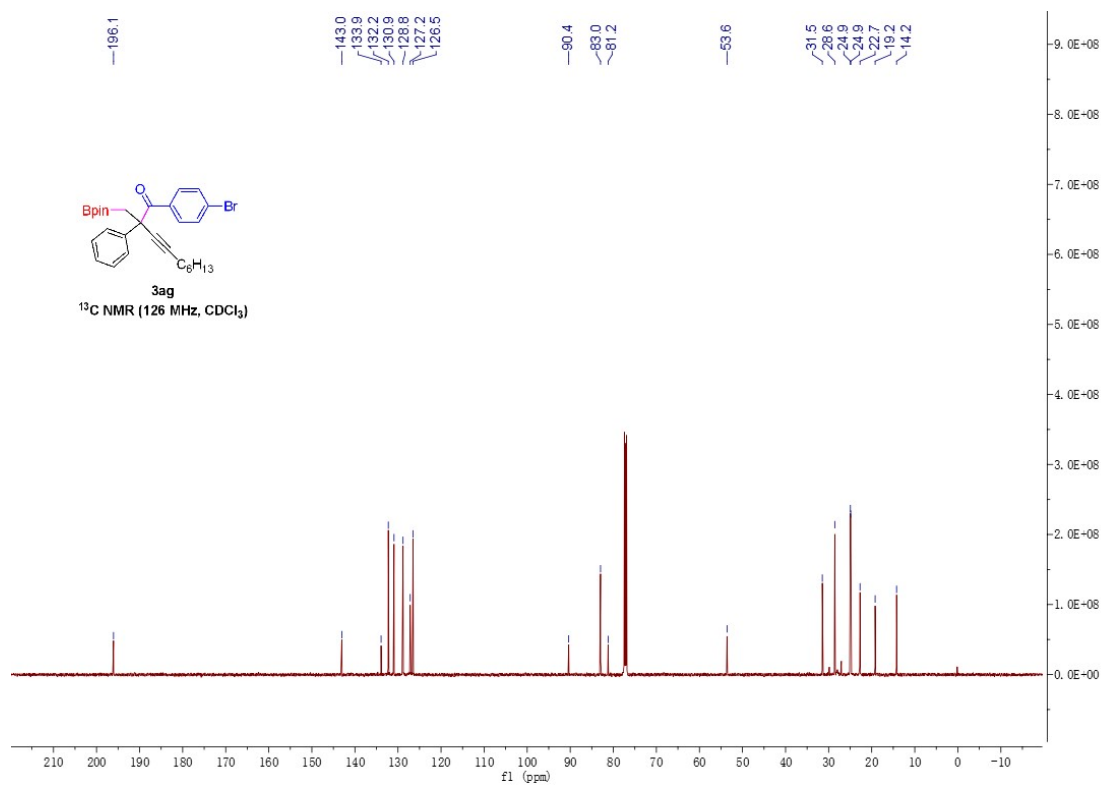

Figure S15. <sup>13</sup>C NMR (126 MHz, CDCl<sub>3</sub>) spectrum of **3ag**

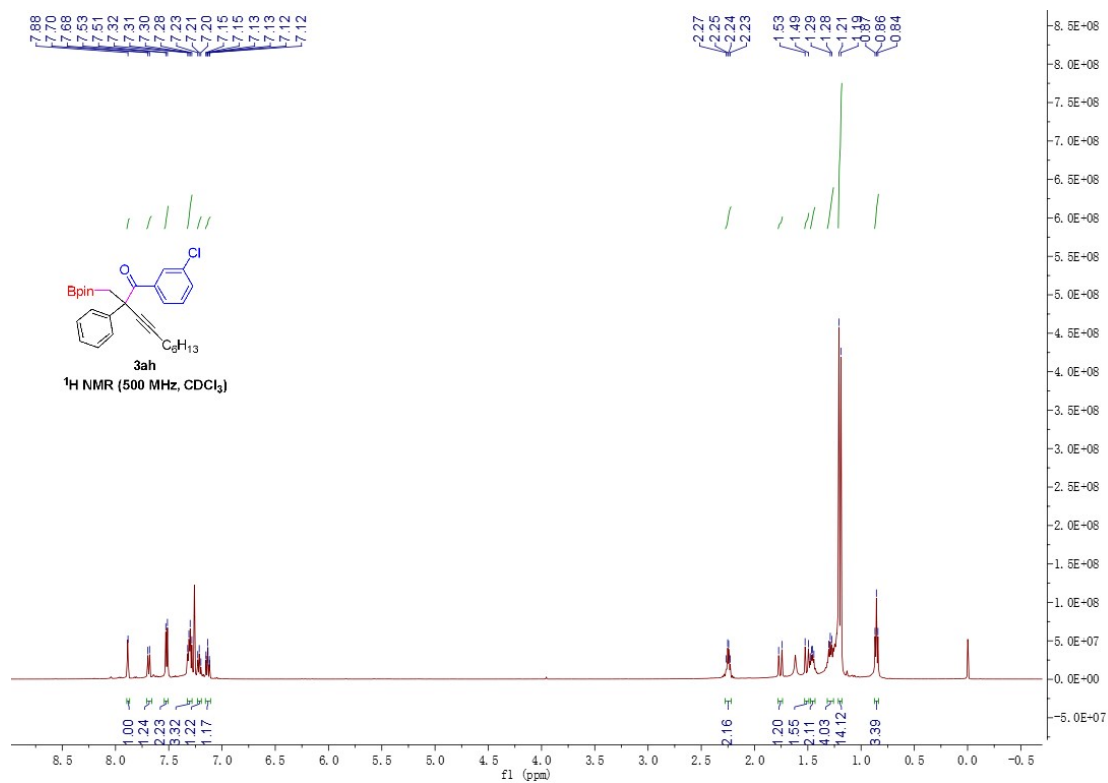

Figure S16. <sup>1</sup>H NMR (500 MHz, CDCl<sub>3</sub>) spectrum of **3ah**

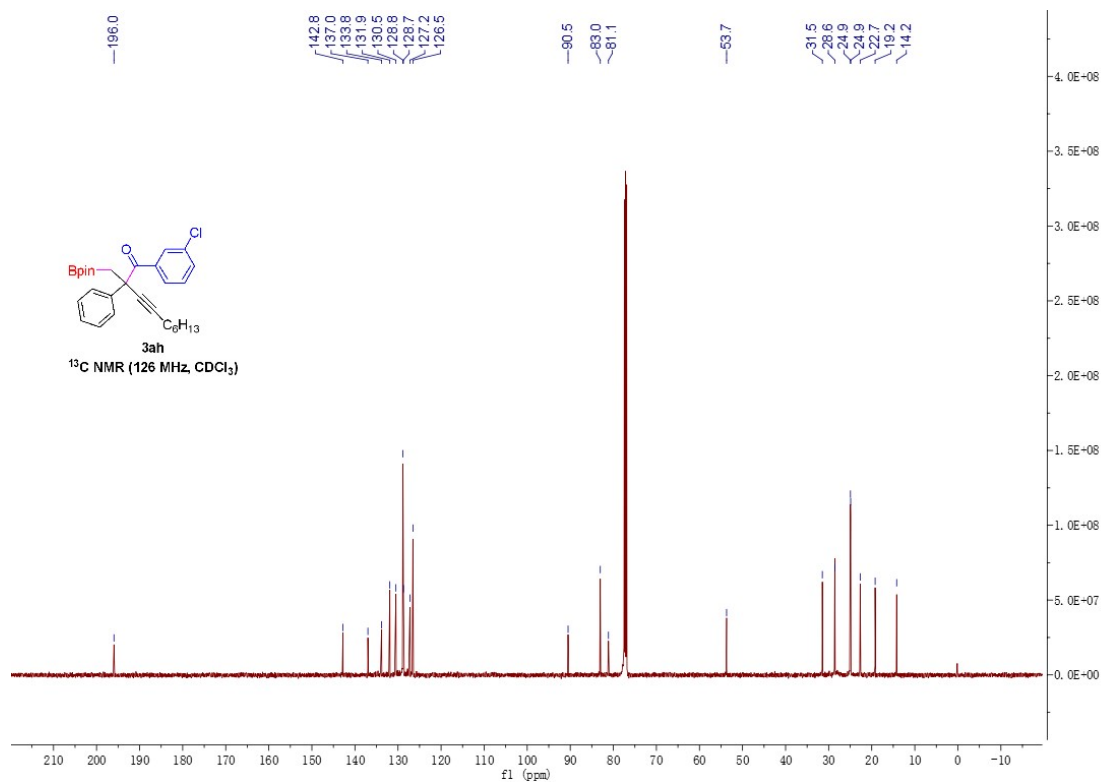

Figure S17.  $^{13}\text{C}$  NMR (126 MHz,  $\text{CDCl}_3$ ) spectrum of **3ah**

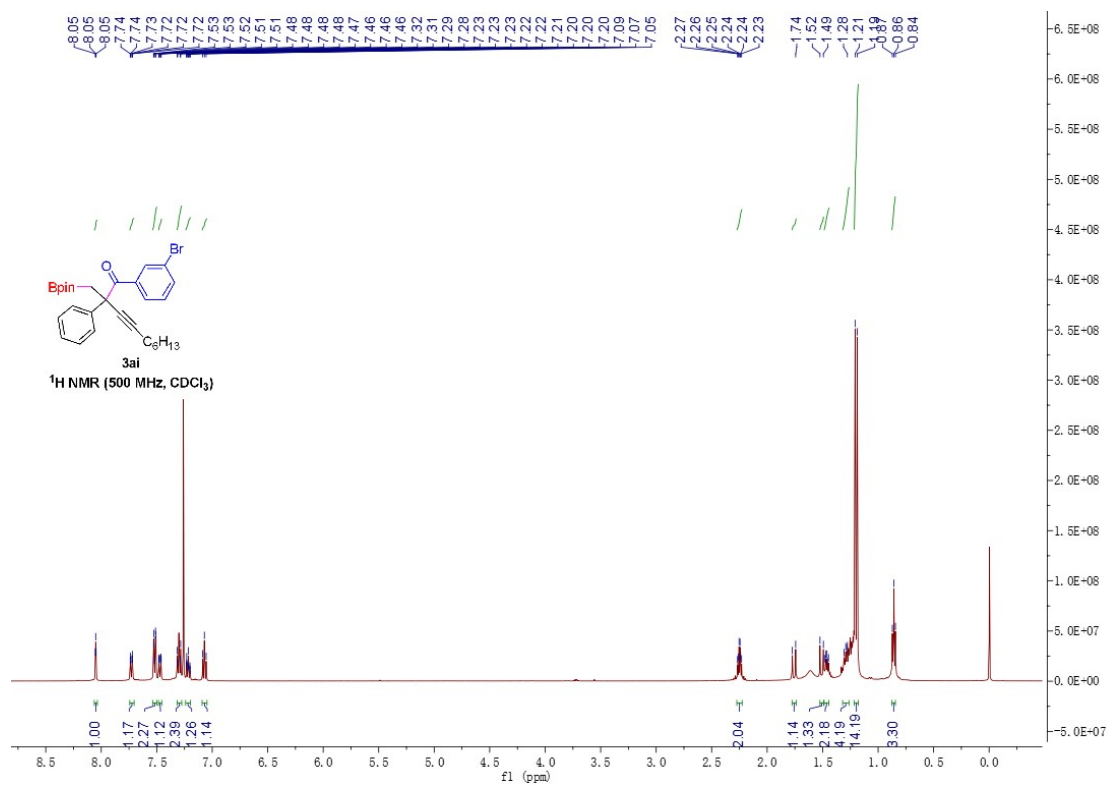

Figure S18.  $^1\text{H}$  NMR (500 MHz,  $\text{CDCl}_3$ ) spectrum of **3ai**



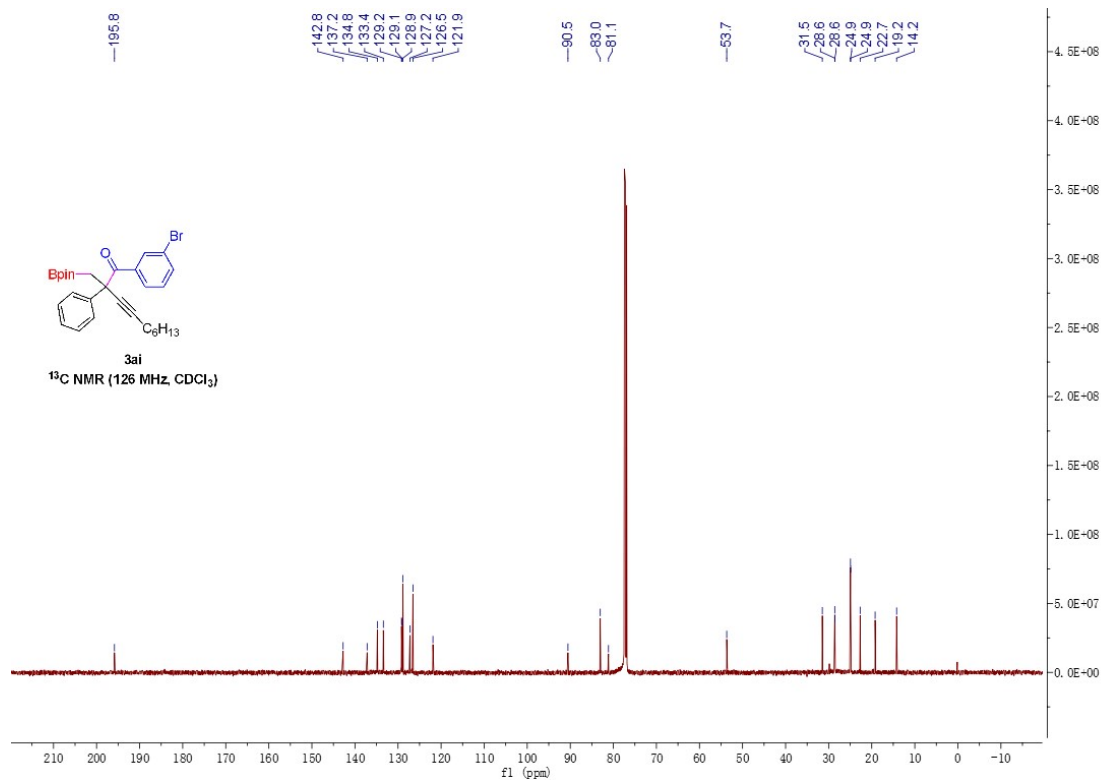

Figure S19.  $^{13}\text{C}$  NMR (126 MHz,  $\text{CDCl}_3$ ) spectrum of 3ai

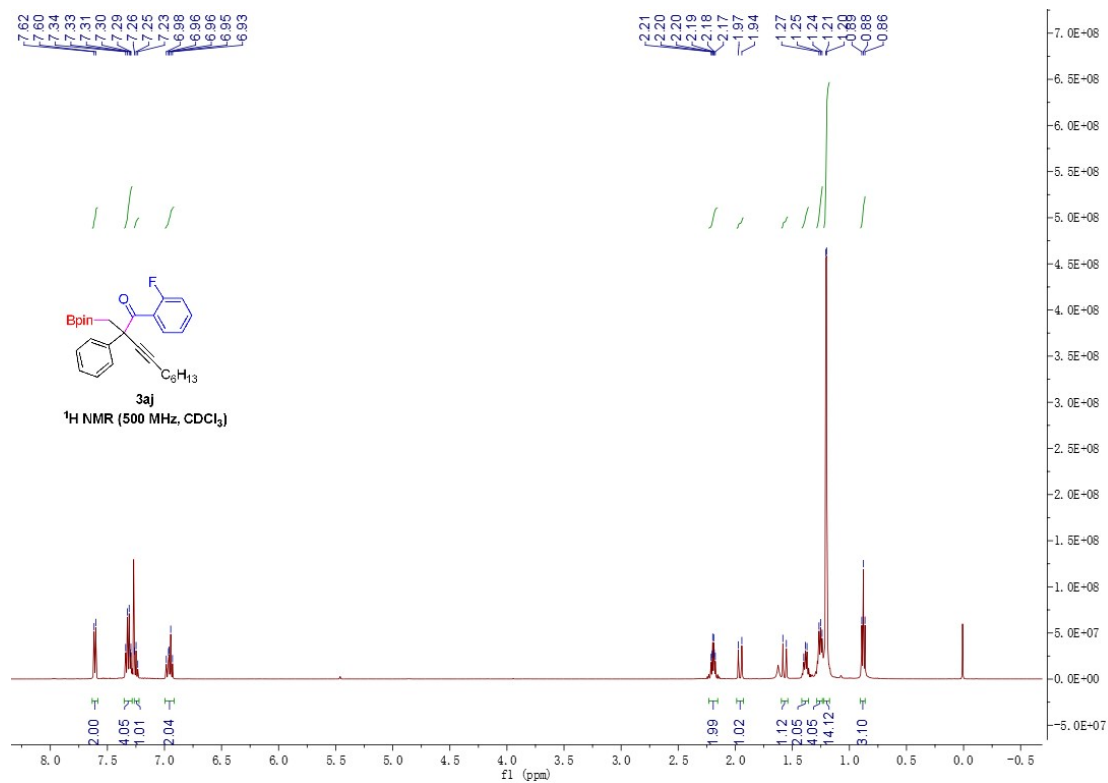

Figure S20.  $^1\text{H}$  NMR (500 MHz,  $\text{CDCl}_3$ ) spectrum of 3aj

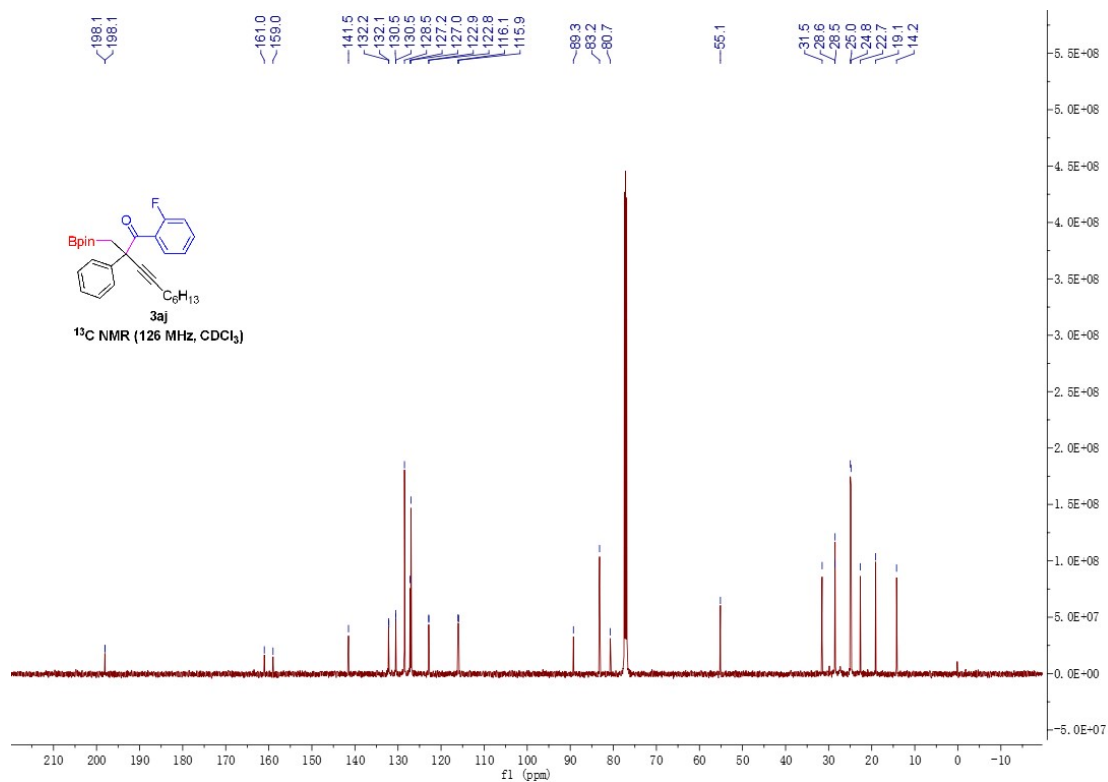

**Figure S21.** <sup>13</sup>C NMR (126 MHz, CDCl<sub>3</sub>) spectrum of **3aj**

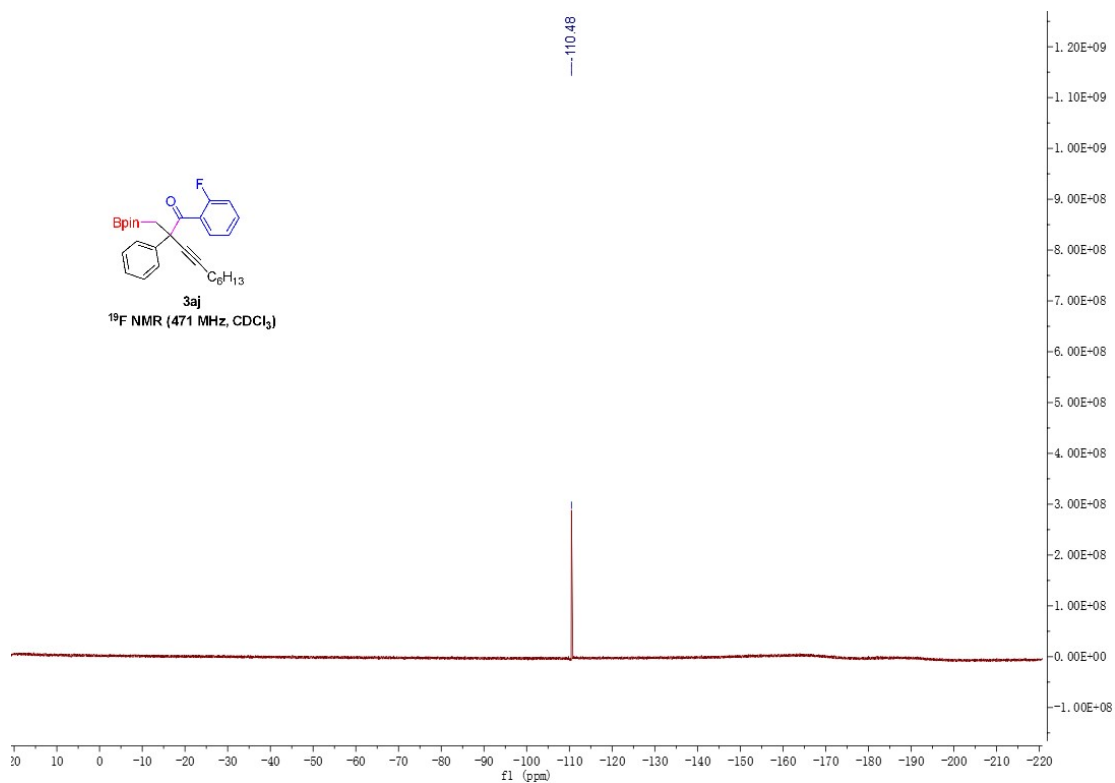

**Figure S22.** <sup>19</sup>F NMR (471 MHz, CDCl<sub>3</sub>) spectrum of **3aj**

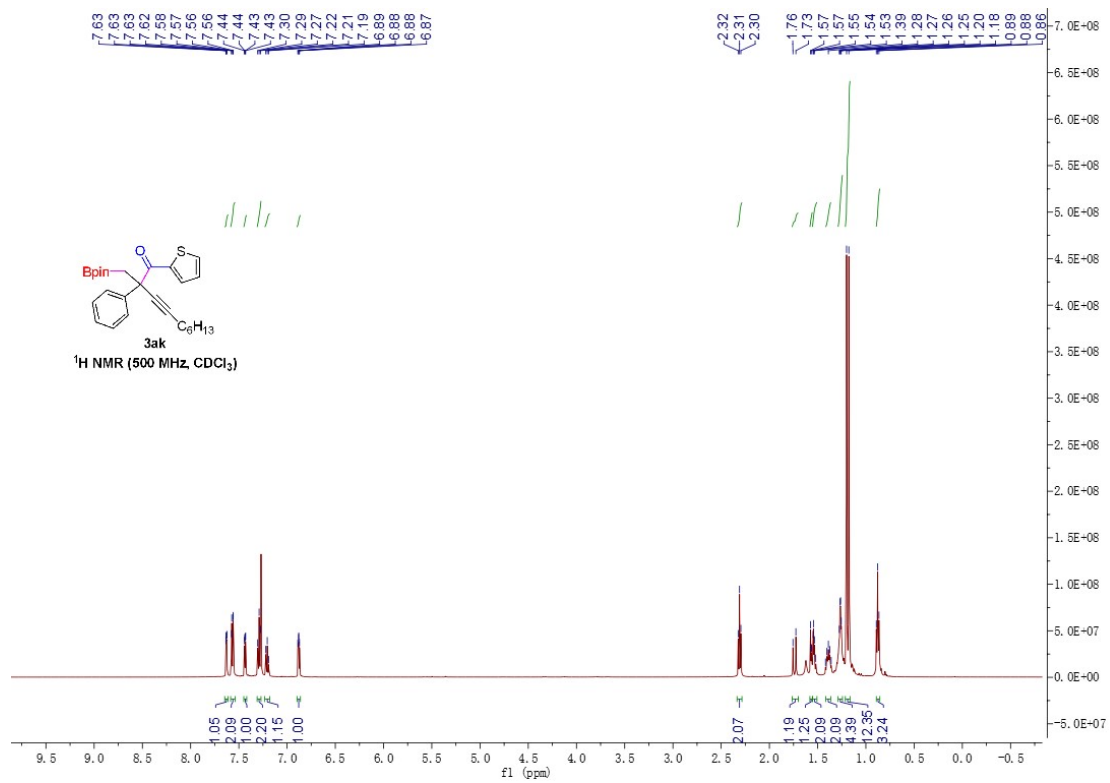

Figure S23. <sup>1</sup>H NMR (500 MHz, CDCl<sub>3</sub>) spectrum of **3ak**

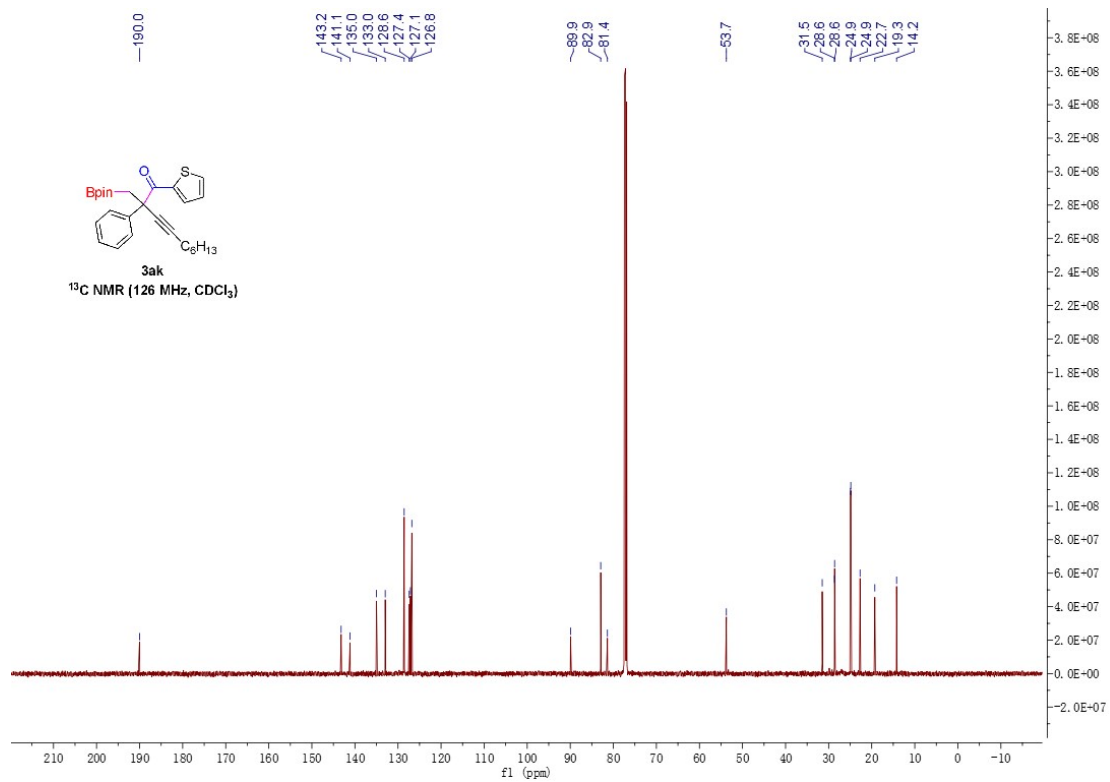

Figure S24. <sup>13</sup>C NMR (126 MHz, CDCl<sub>3</sub>) spectrum of **3ak**

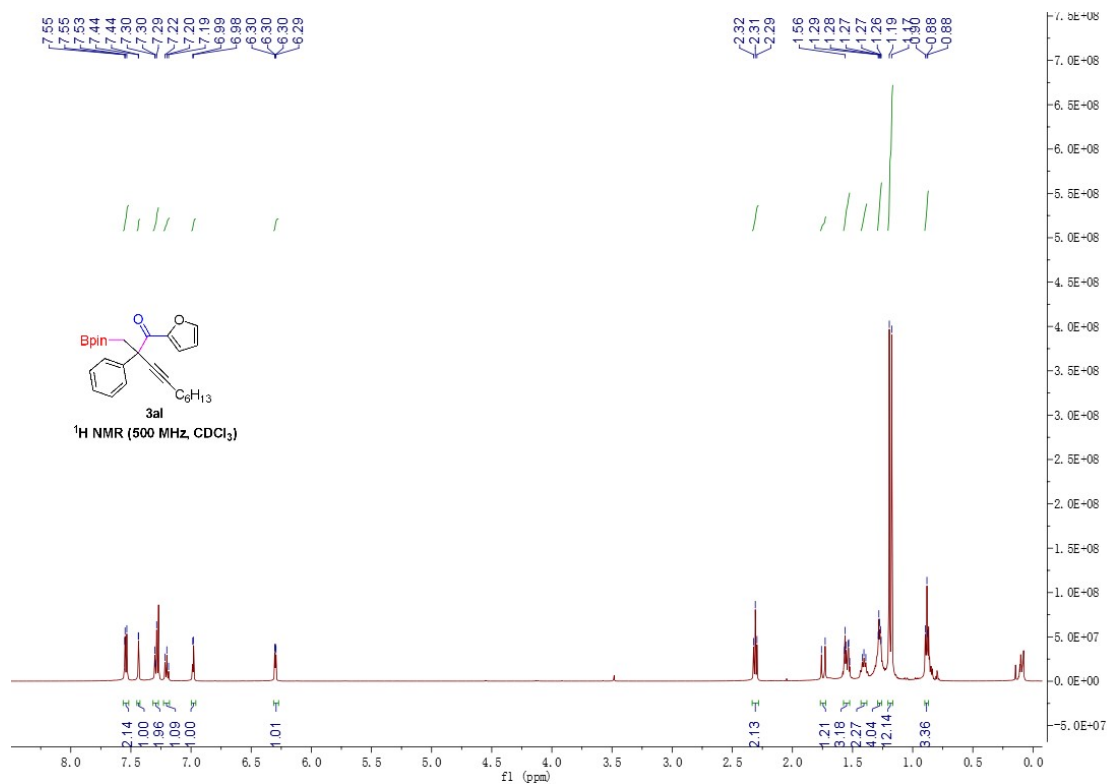

Figure S25. <sup>1</sup>H NMR (500 MHz, CDCl<sub>3</sub>) spectrum of 3al

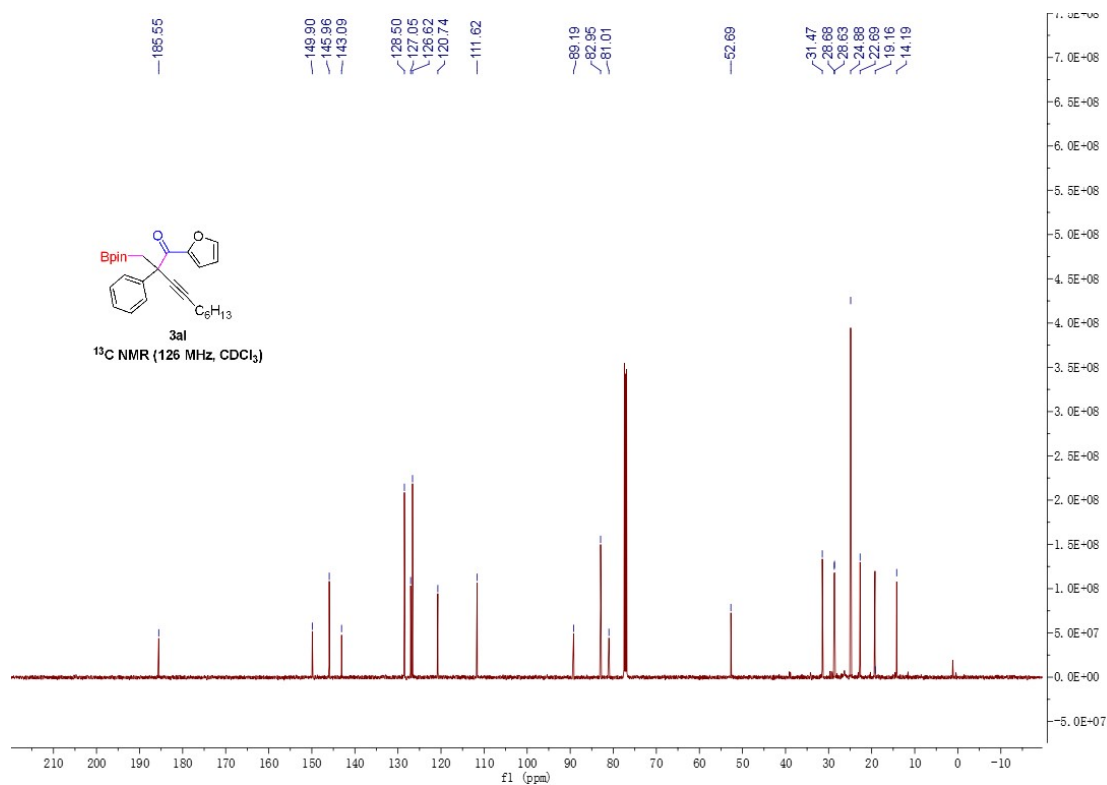

Figure S26. <sup>13</sup>C NMR (126 MHz, CDCl<sub>3</sub>) spectrum of 3al

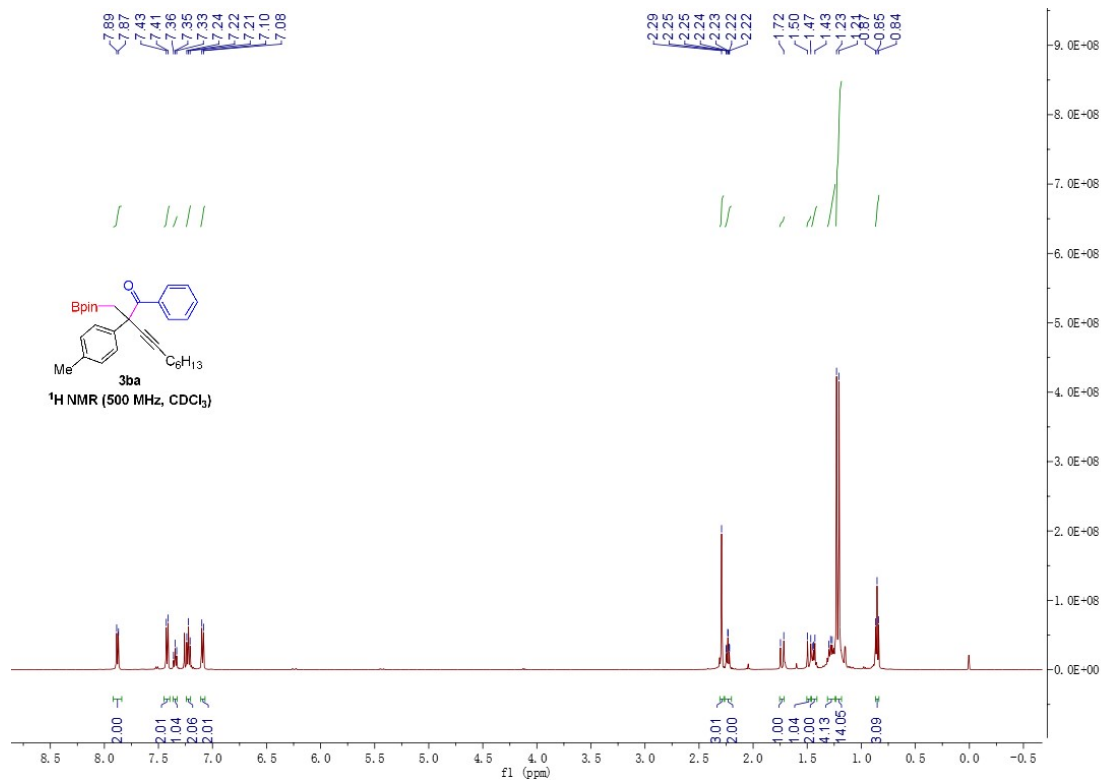

Figure S27. <sup>1</sup>H NMR (500 MHz, CDCl<sub>3</sub>) spectrum of 3ba

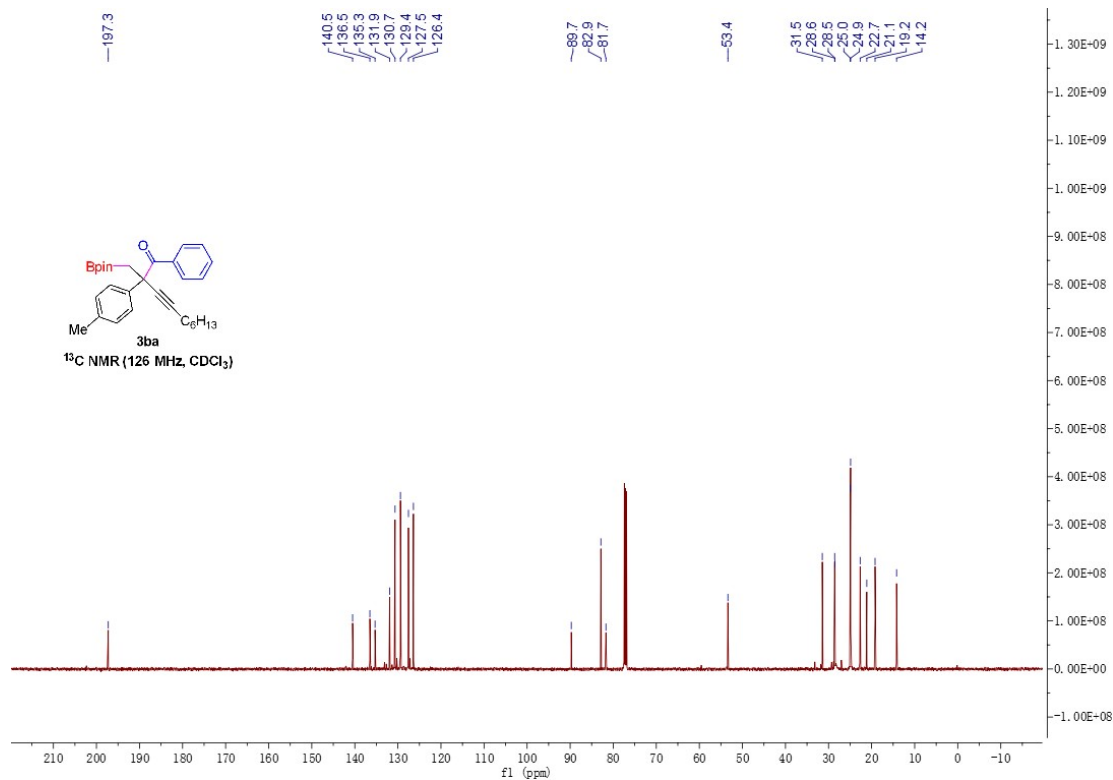

Figure S28. <sup>13</sup>C NMR (126 MHz, CDCl<sub>3</sub>) spectrum of 3ba

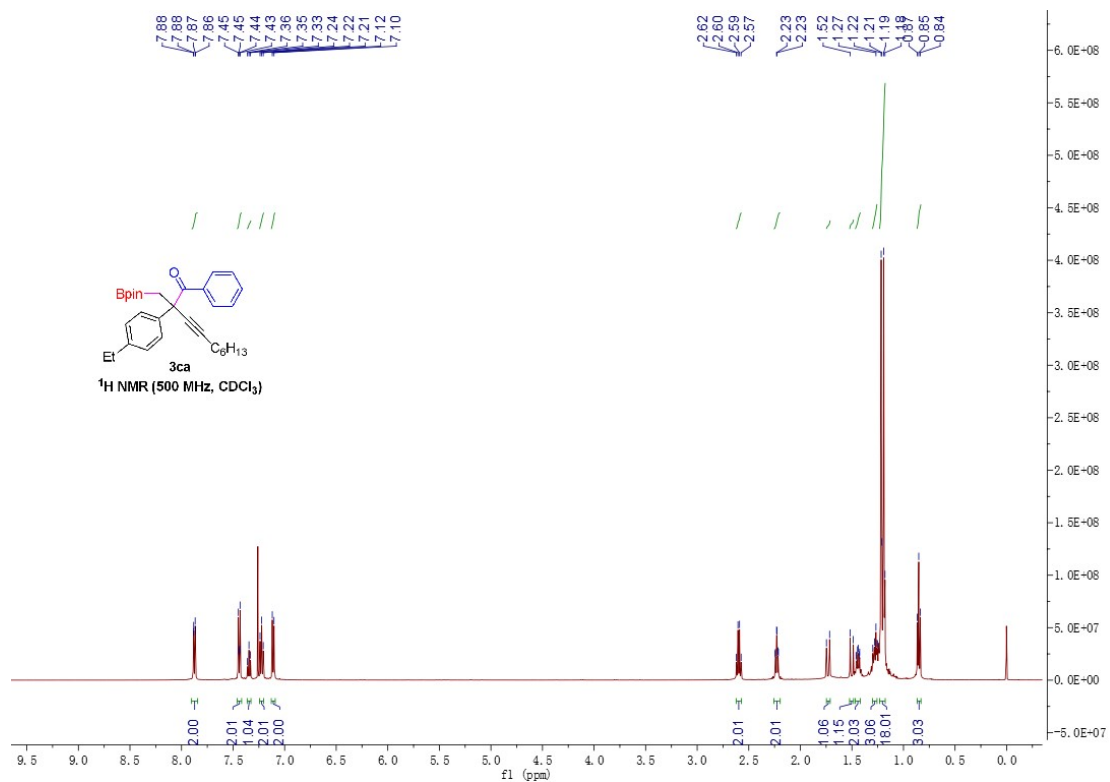

Figure S29. <sup>1</sup>H NMR (500 MHz, CDCl<sub>3</sub>) spectrum of 3ca

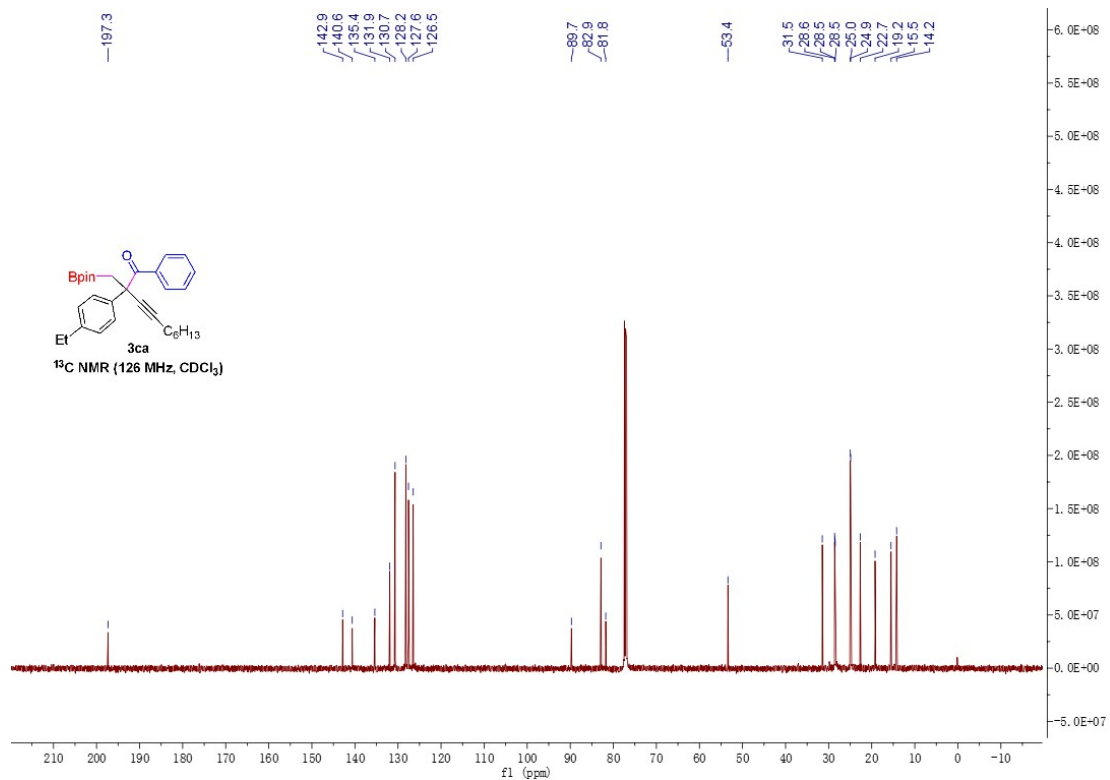

Figure S30. <sup>13</sup>C NMR (126 MHz, CDCl<sub>3</sub>) spectrum of 3ca

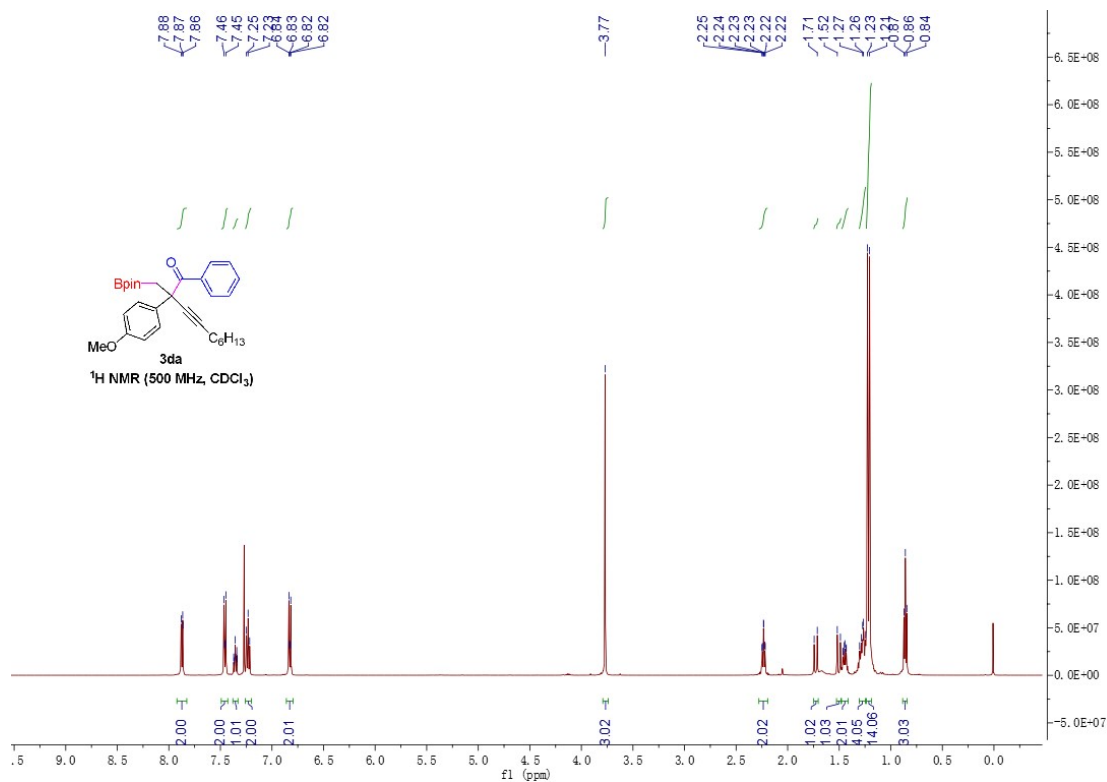

Figure S31. <sup>1</sup>H NMR (500 MHz, CDCl<sub>3</sub>) spectrum of 3da

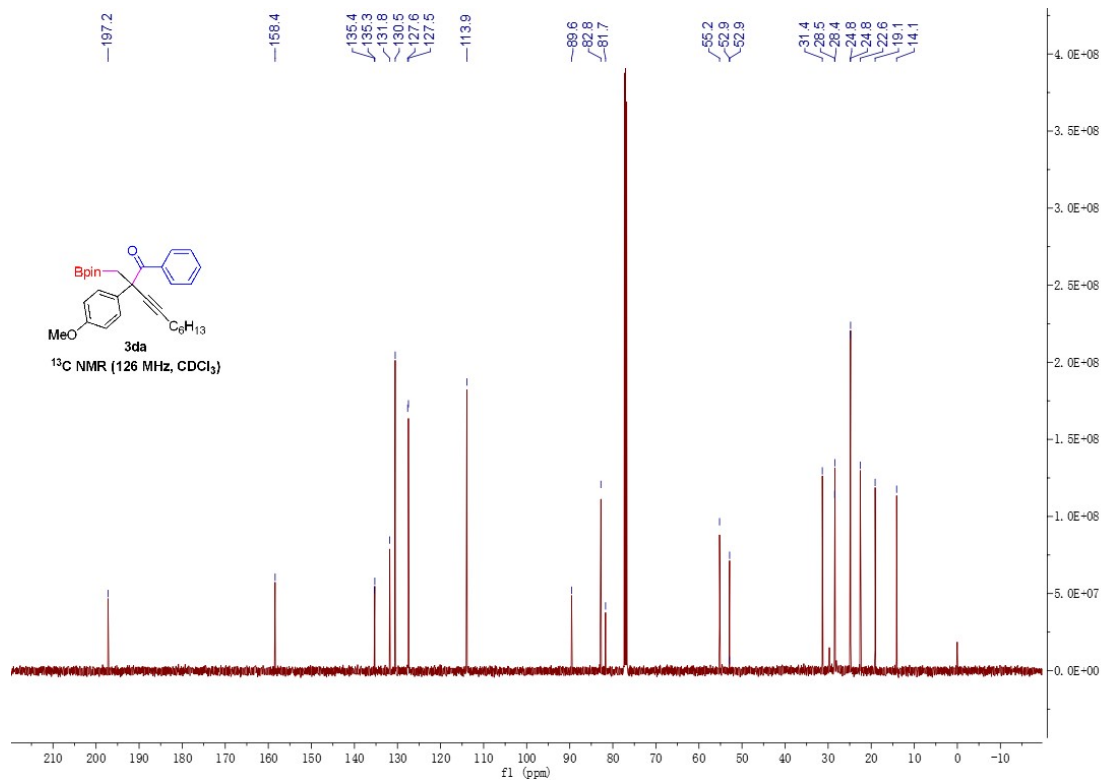

Figure S32. <sup>13</sup>C NMR (126 MHz, CDCl<sub>3</sub>) spectrum of 3da

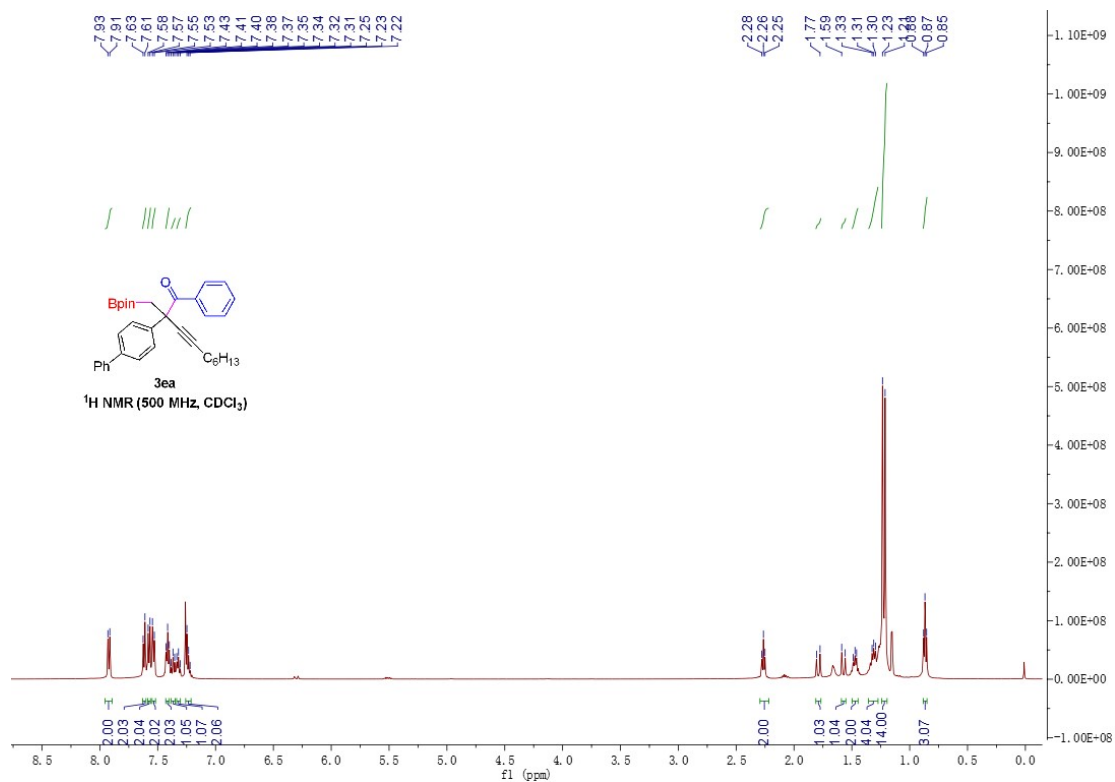

**Figure S33.** <sup>1</sup>H NMR (500 MHz, CDCl<sub>3</sub>) spectrum of 3ea

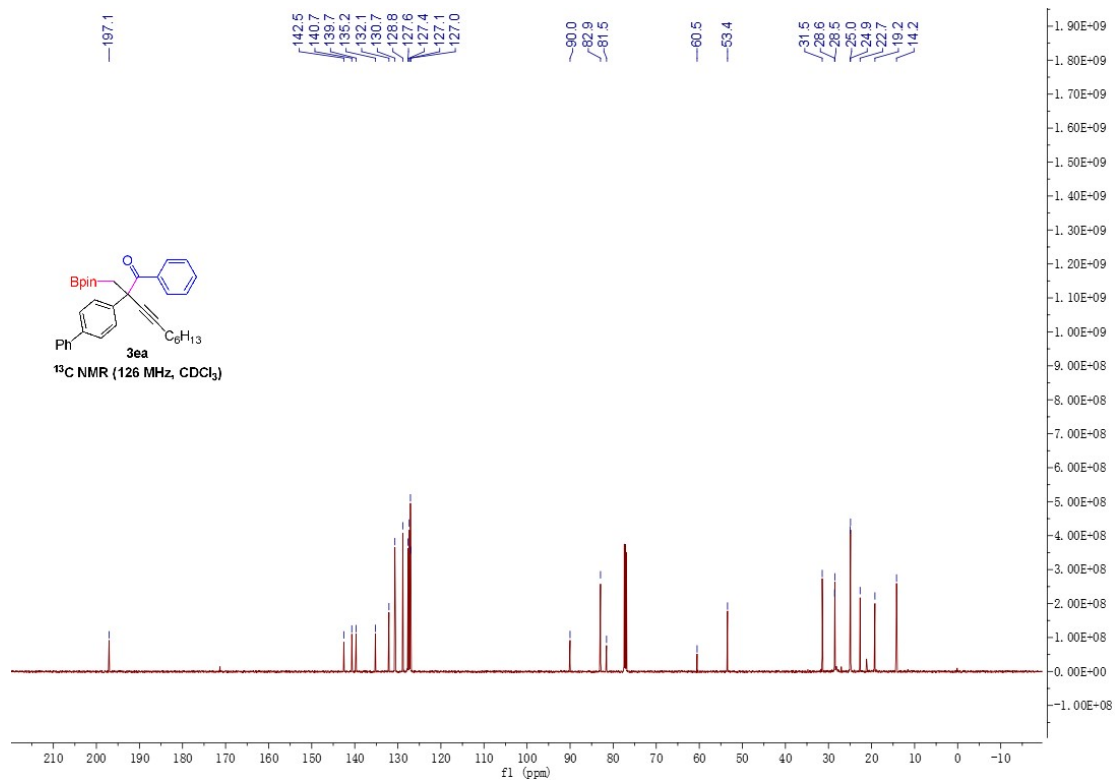

**Figure S34.** <sup>13</sup>C NMR (126 MHz, CDCl<sub>3</sub>) spectrum of 3ea



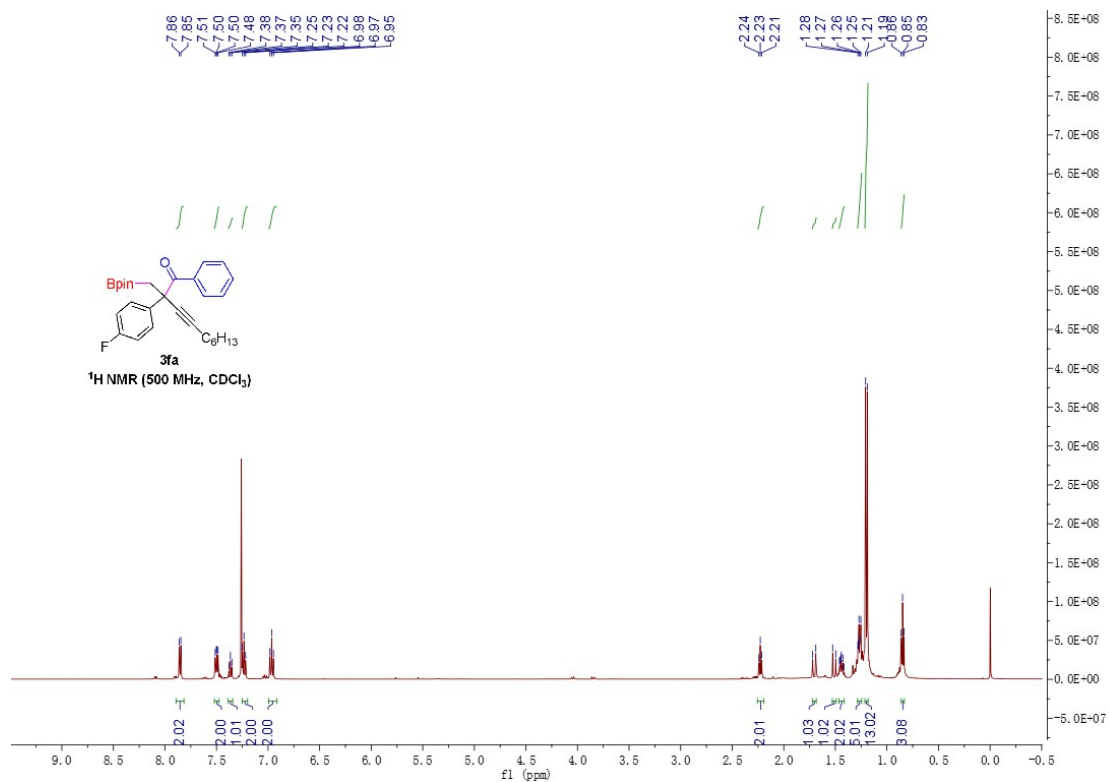

Figure S35. <sup>1</sup>H NMR (500 MHz, CDCl<sub>3</sub>) spectrum of 3fa

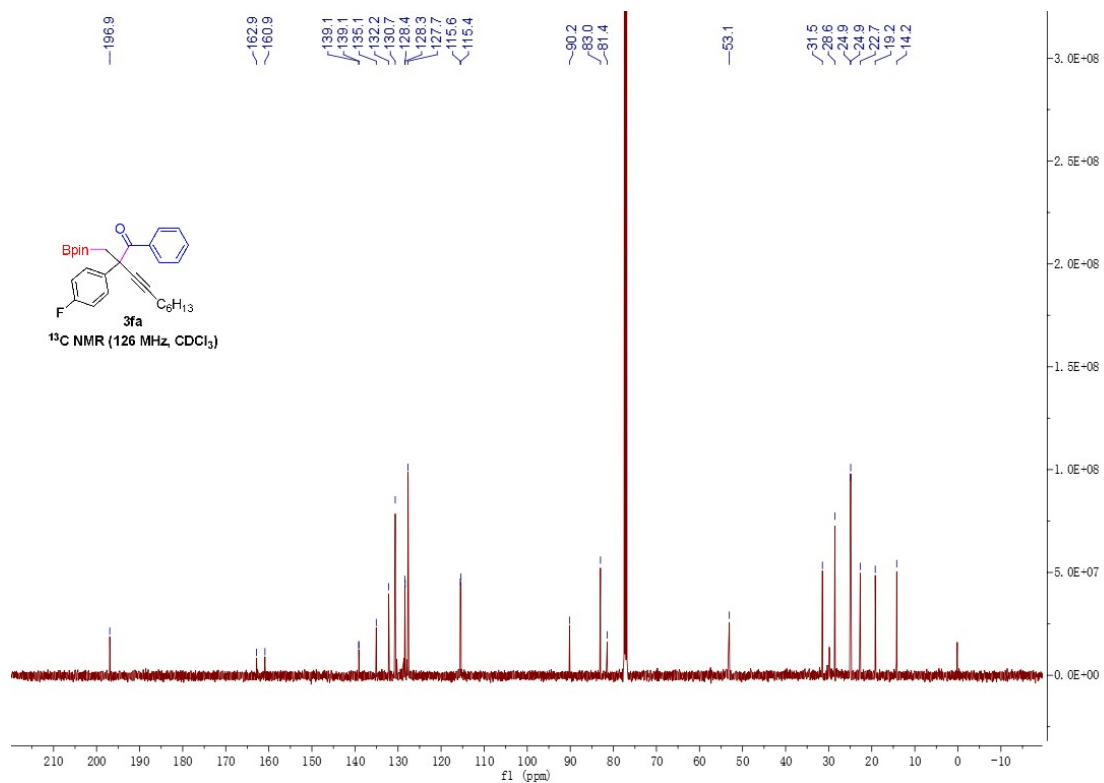

Figure S36. <sup>13</sup>C NMR (126 MHz, CDCl<sub>3</sub>) spectrum of 3fa

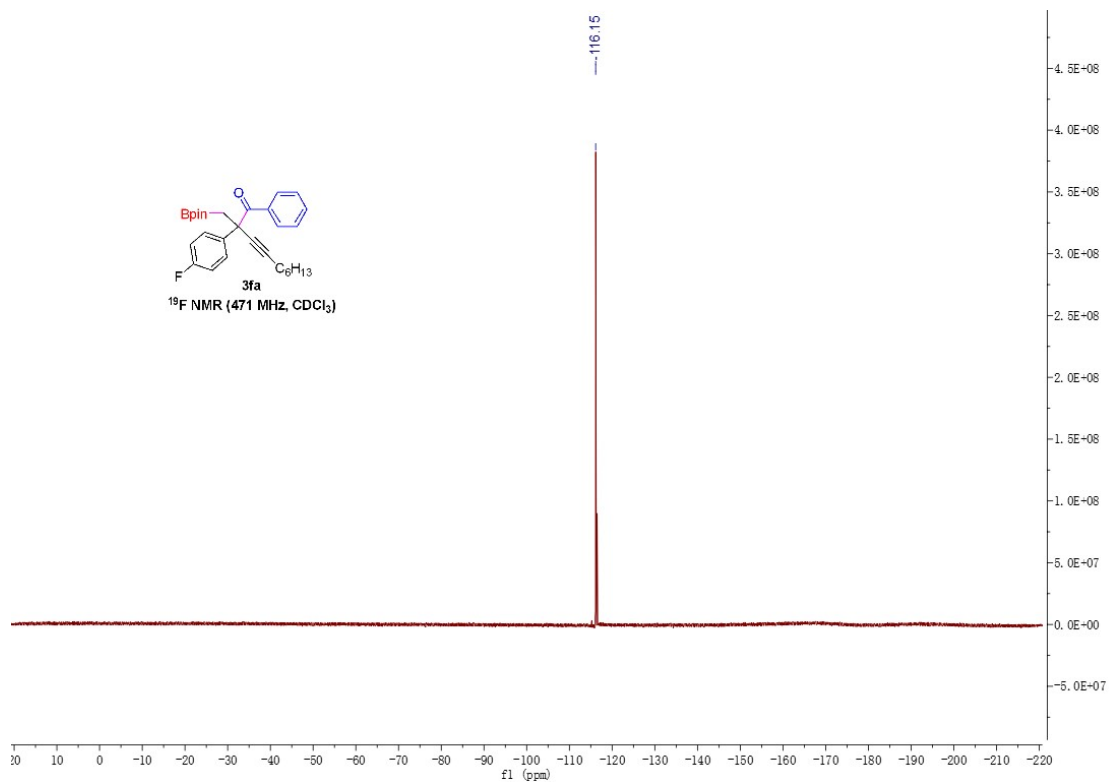

Figure S37. <sup>19</sup>F NMR (471 MHz, CDCl<sub>3</sub>) spectrum of 3fa

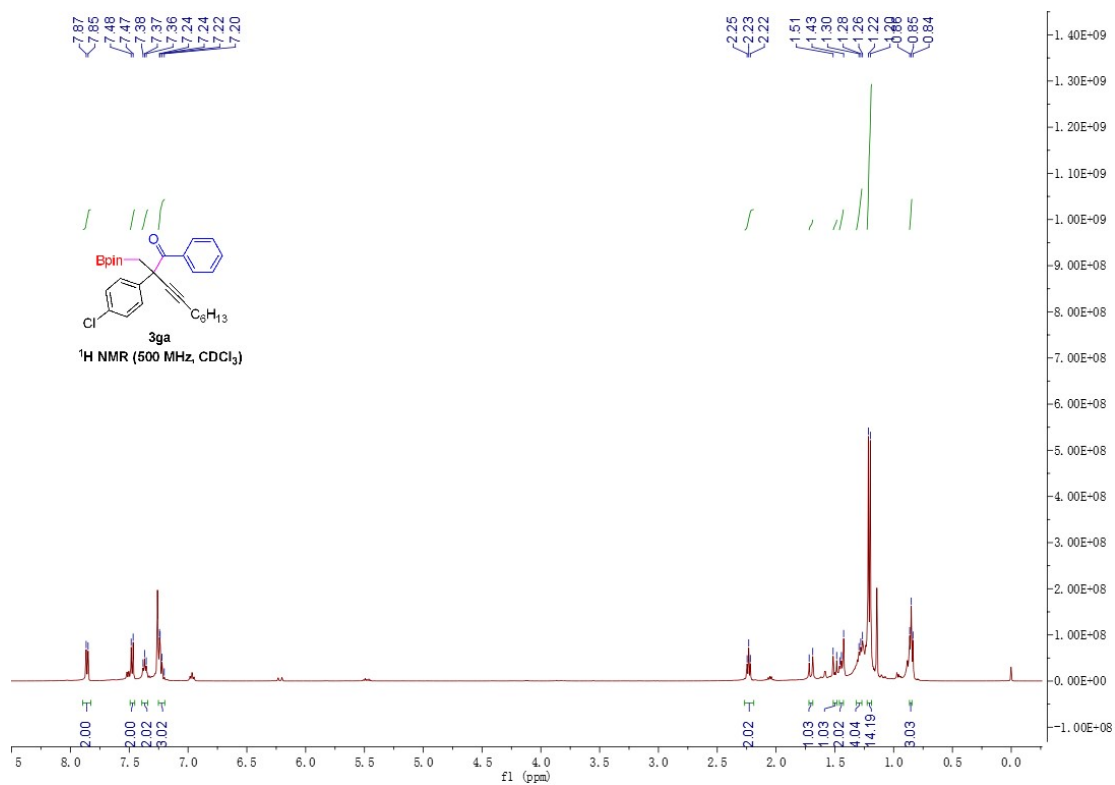

Figure S38. <sup>1</sup>H NMR (500 MHz, CDCl<sub>3</sub>) spectrum of 3ga

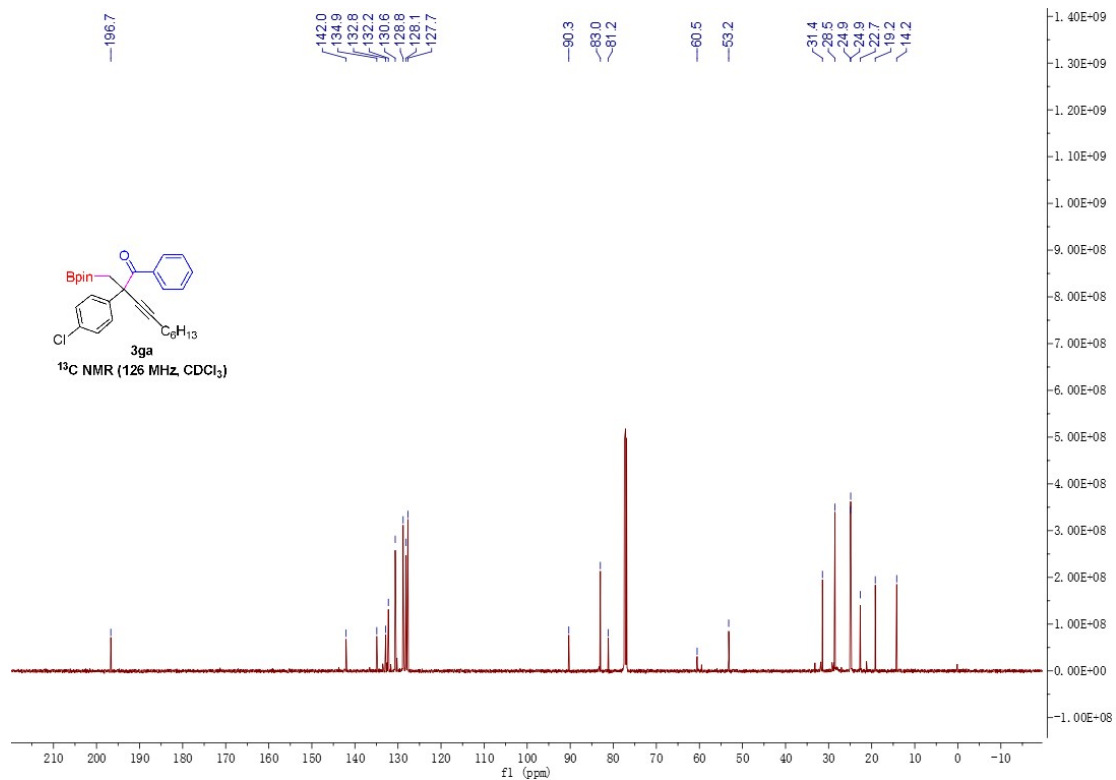

Figure S39. <sup>13</sup>C NMR (126 MHz, CDCl<sub>3</sub>) spectrum of 3ga

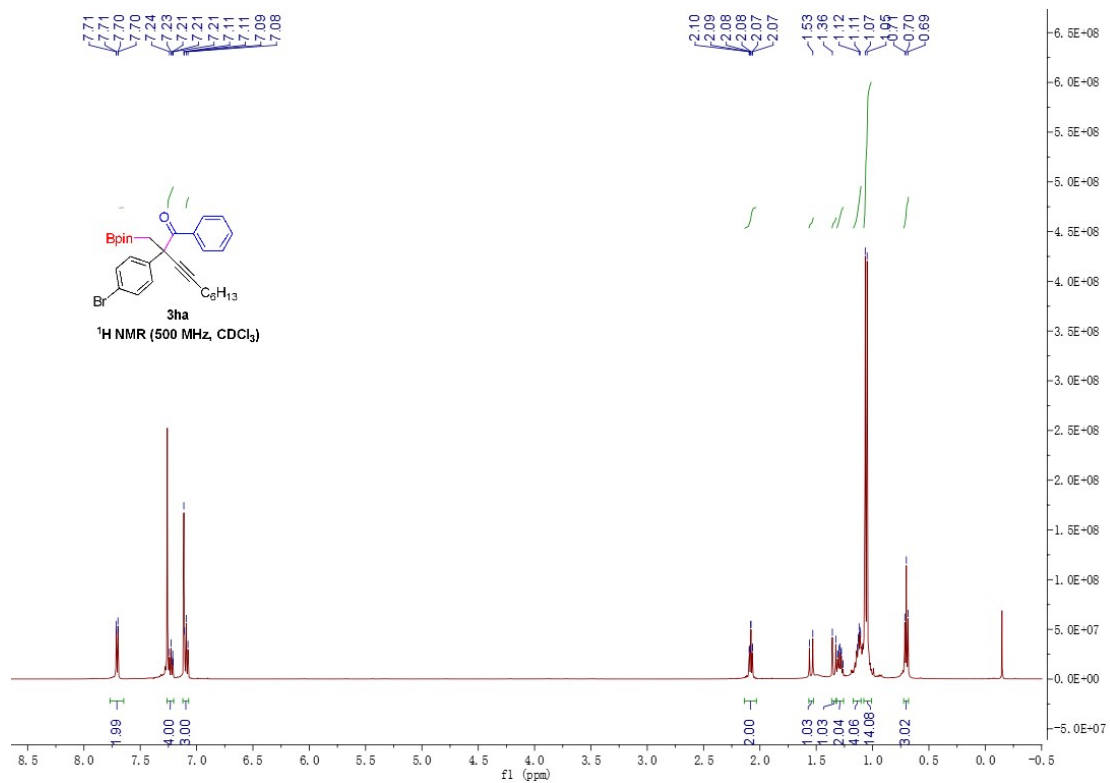

Figure S40. <sup>1</sup>H NMR (500 MHz, CDCl<sub>3</sub>) spectrum of 3ha

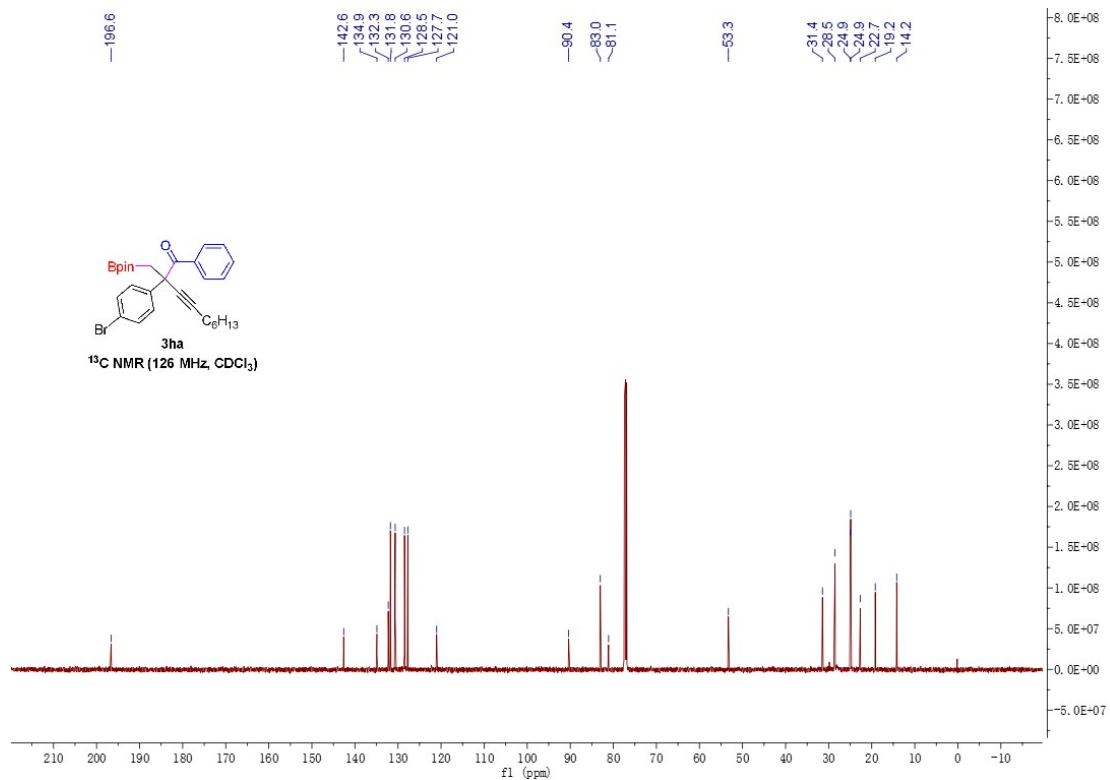

Figure S41. <sup>13</sup>C NMR (126 MHz, CDCl<sub>3</sub>) spectrum of 3ha

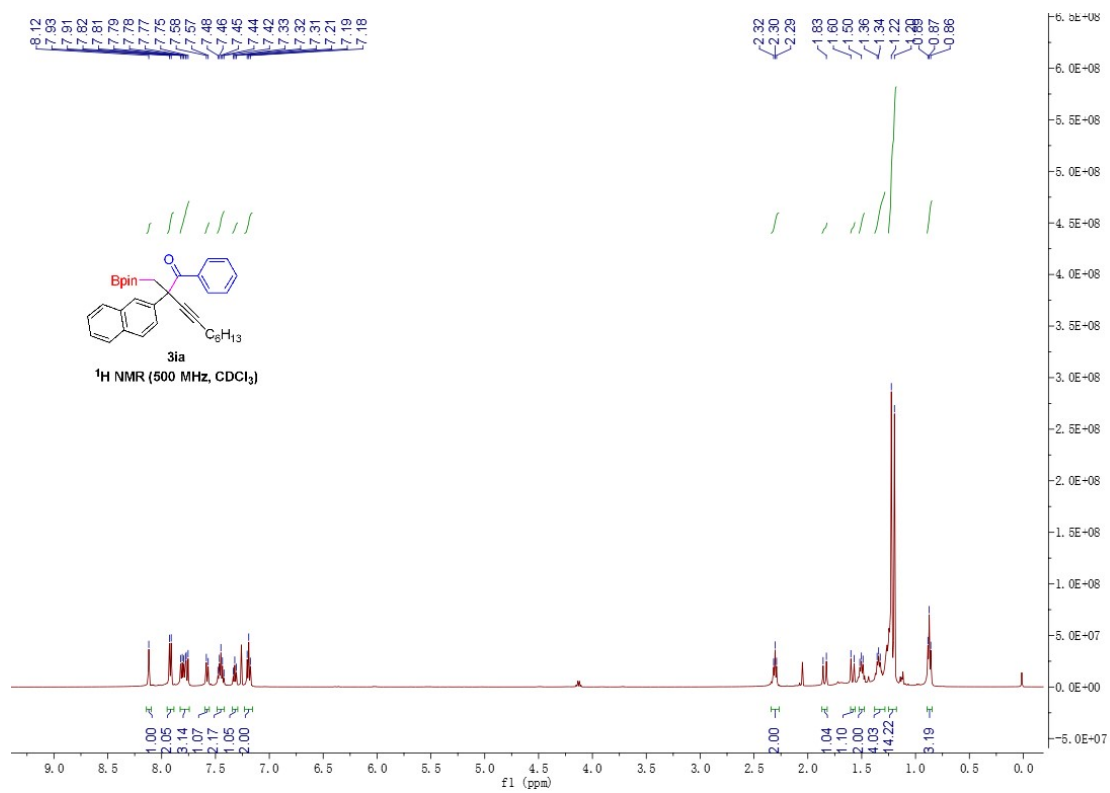

Figure S42. <sup>1</sup>H NMR (500 MHz, CDCl<sub>3</sub>) spectrum of 3ia

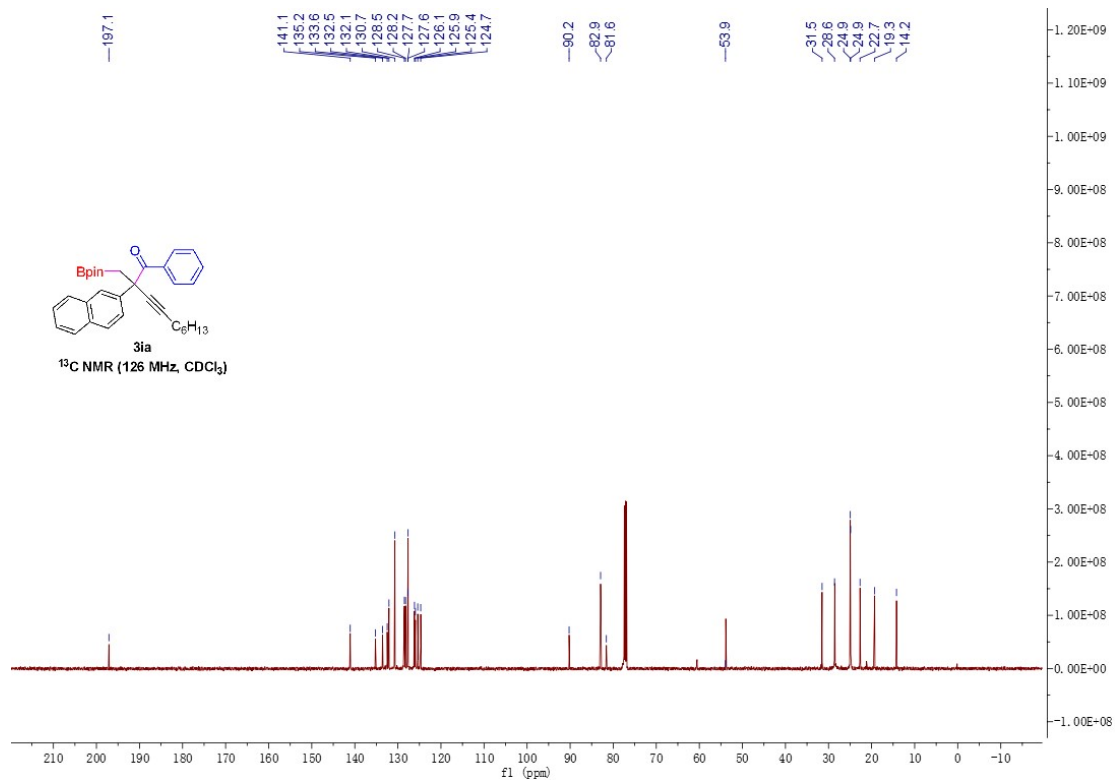

Figure S43.  $^{13}\text{C}$  NMR (126 MHz,  $\text{CDCl}_3$ ) spectrum of **3ia**

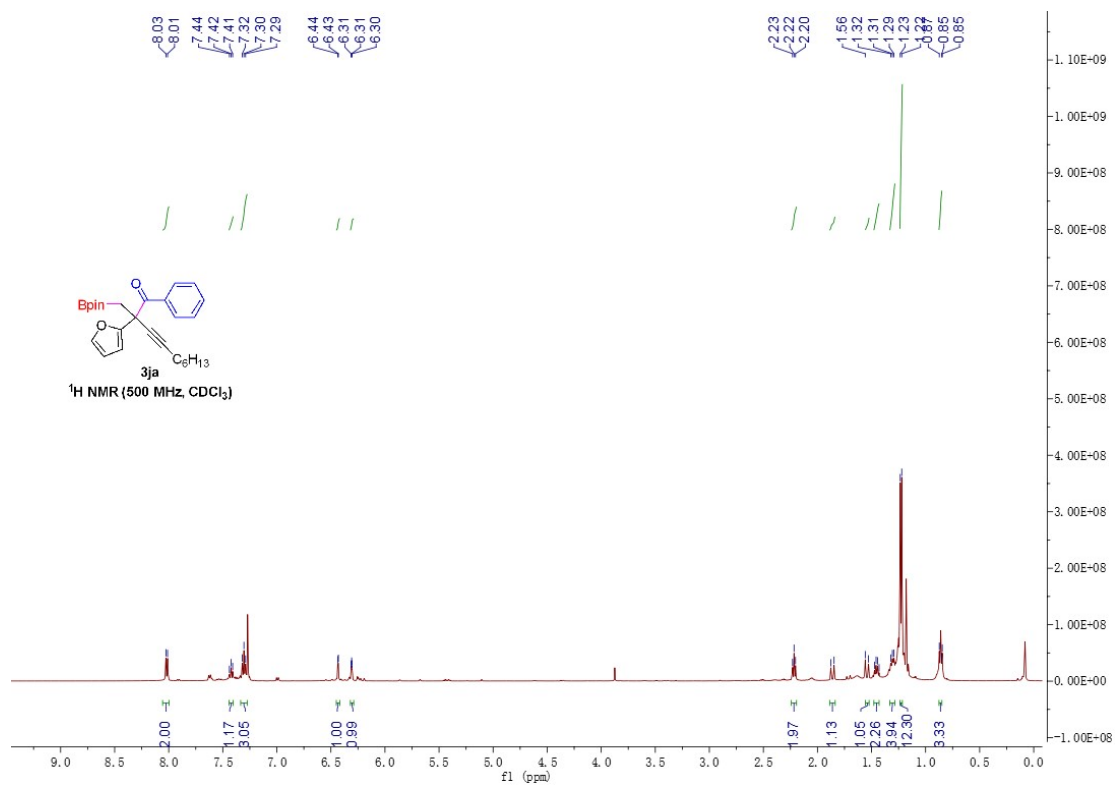

Figure S44.  $^1\text{H}$  NMR (500 MHz,  $\text{CDCl}_3$ ) spectrum of **3ja**

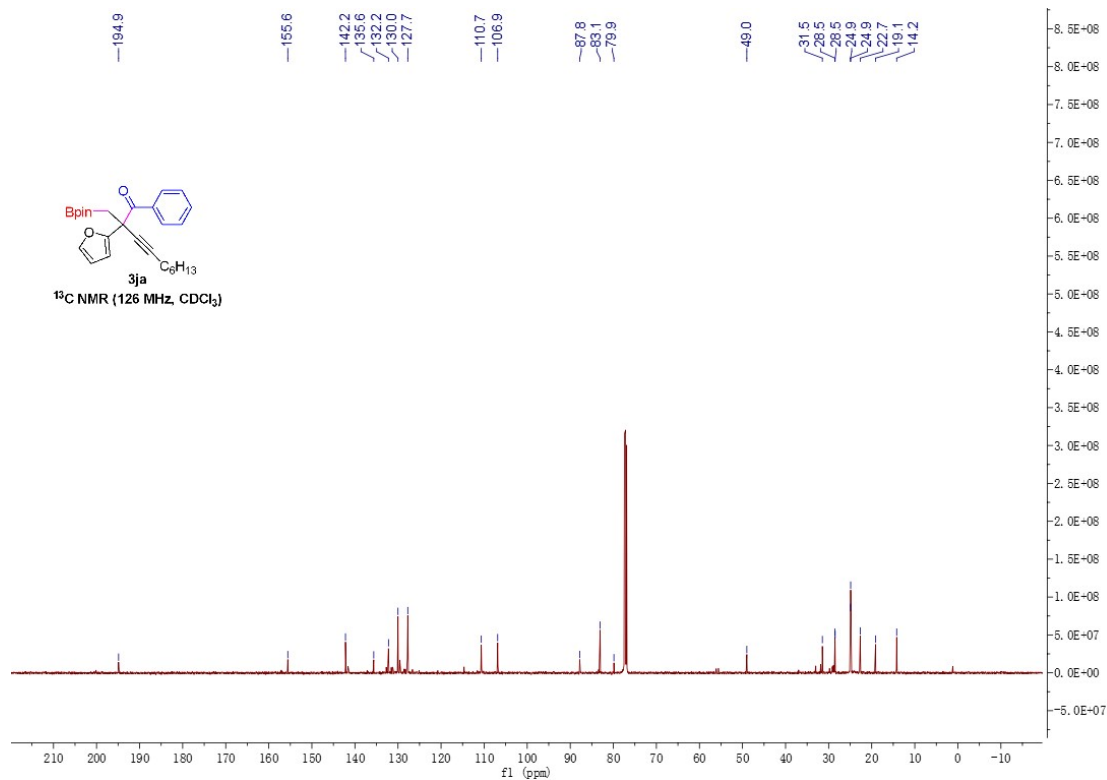

Figure S45.  $^{13}\text{C}$  NMR (126 MHz,  $\text{CDCl}_3$ ) spectrum of **3ja**

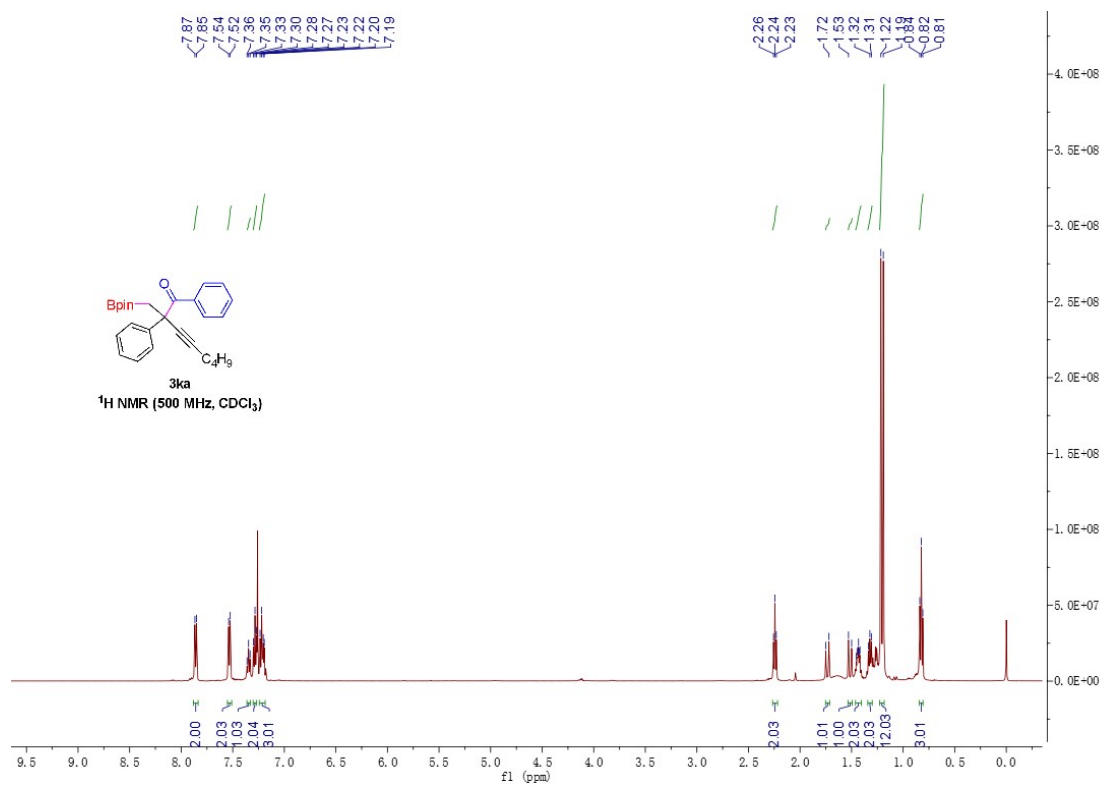

Figure S46.  $^1\text{H}$  NMR (500 MHz,  $\text{CDCl}_3$ ) spectrum of **3ka**

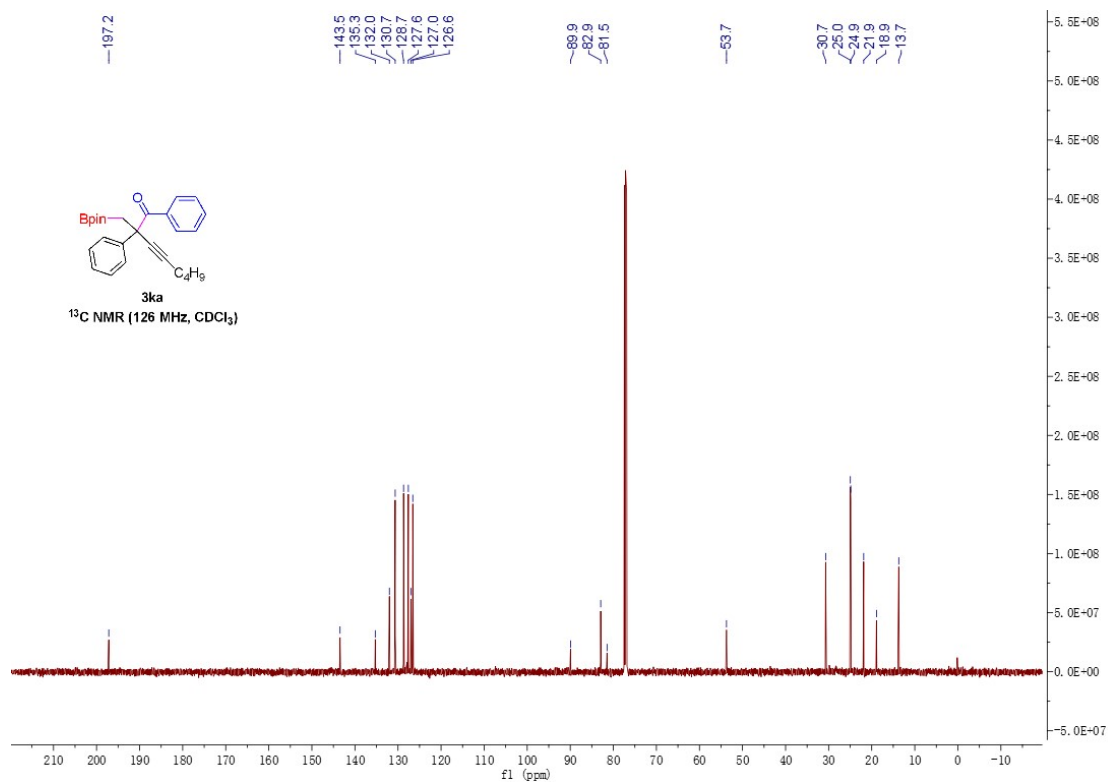

Figure S47.  $^{13}\text{C}$  NMR (126 MHz,  $\text{CDCl}_3$ ) spectrum of **3ka**

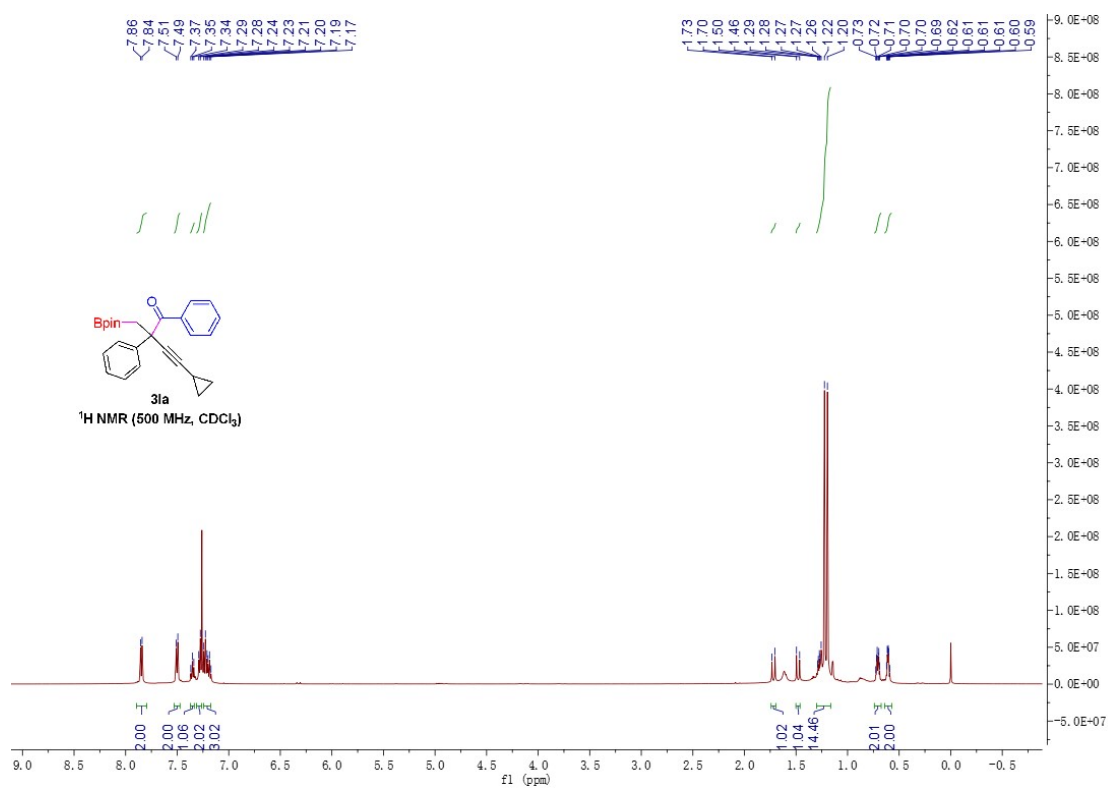

Figure S48.  $^1\text{H}$  NMR (500 MHz,  $\text{CDCl}_3$ ) spectrum of **3la**

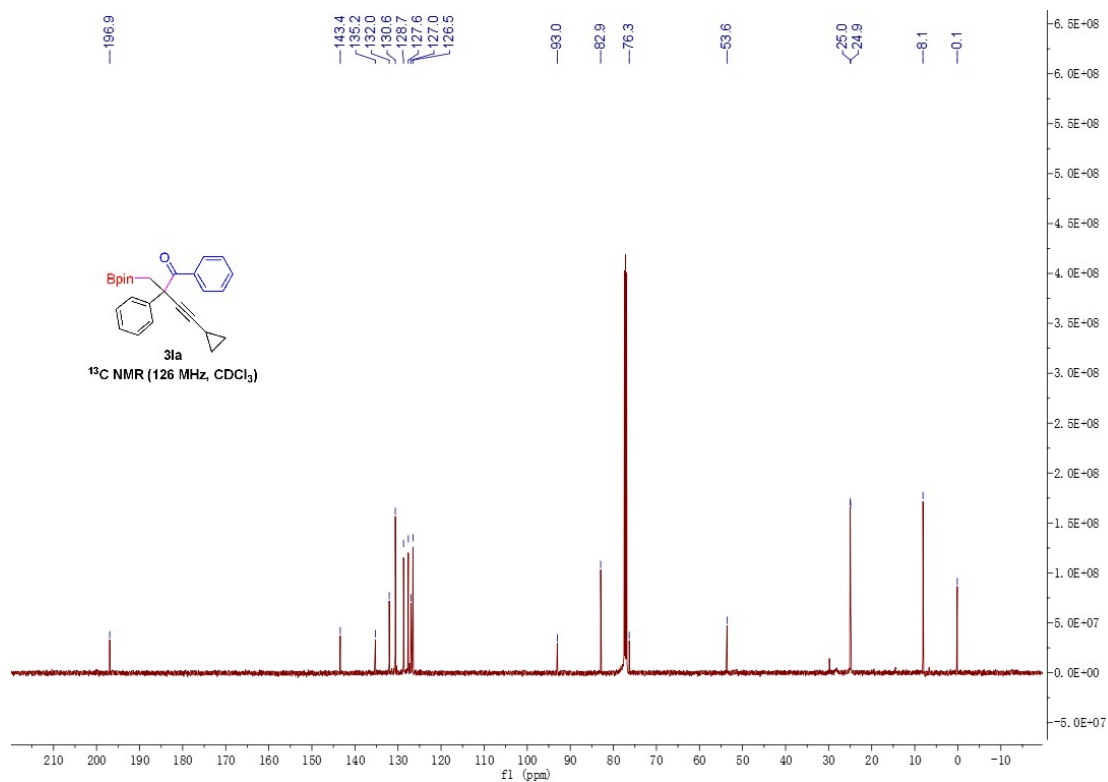

Figure S49. <sup>13</sup>C NMR (126 MHz, CDCl<sub>3</sub>) spectrum of 3a

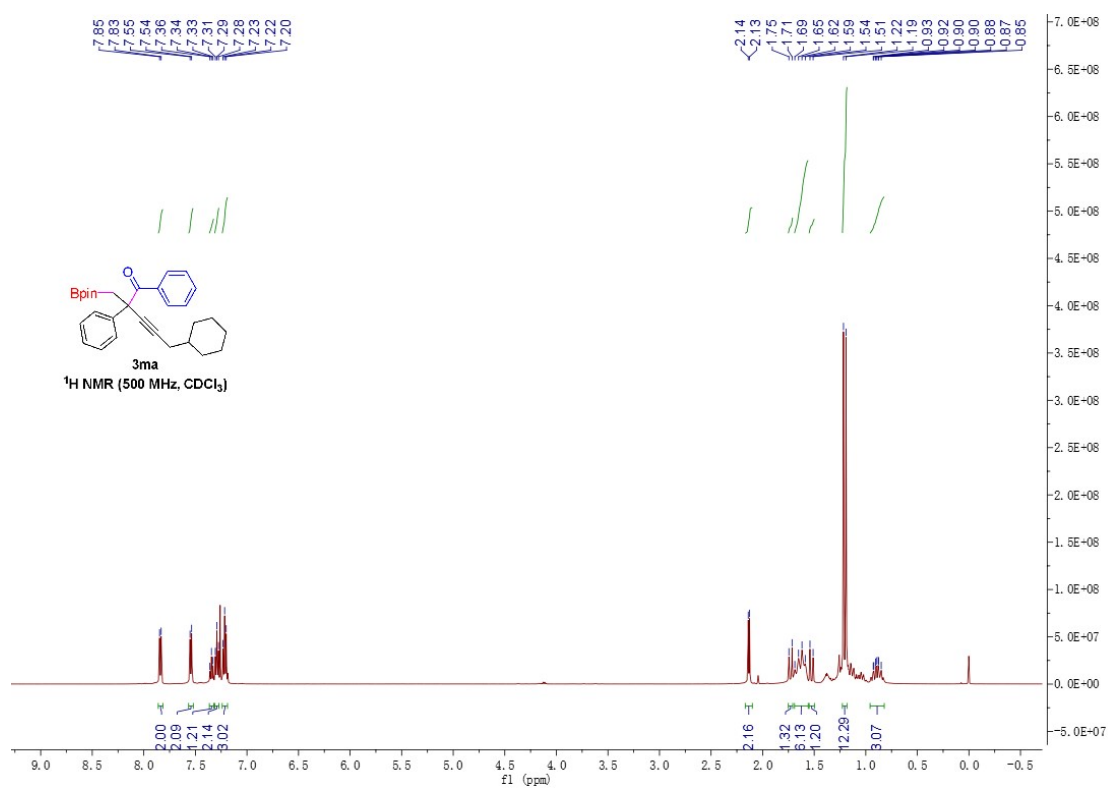

Figure S50. <sup>1</sup>H NMR (500 MHz, CDCl<sub>3</sub>) spectrum of 3ma



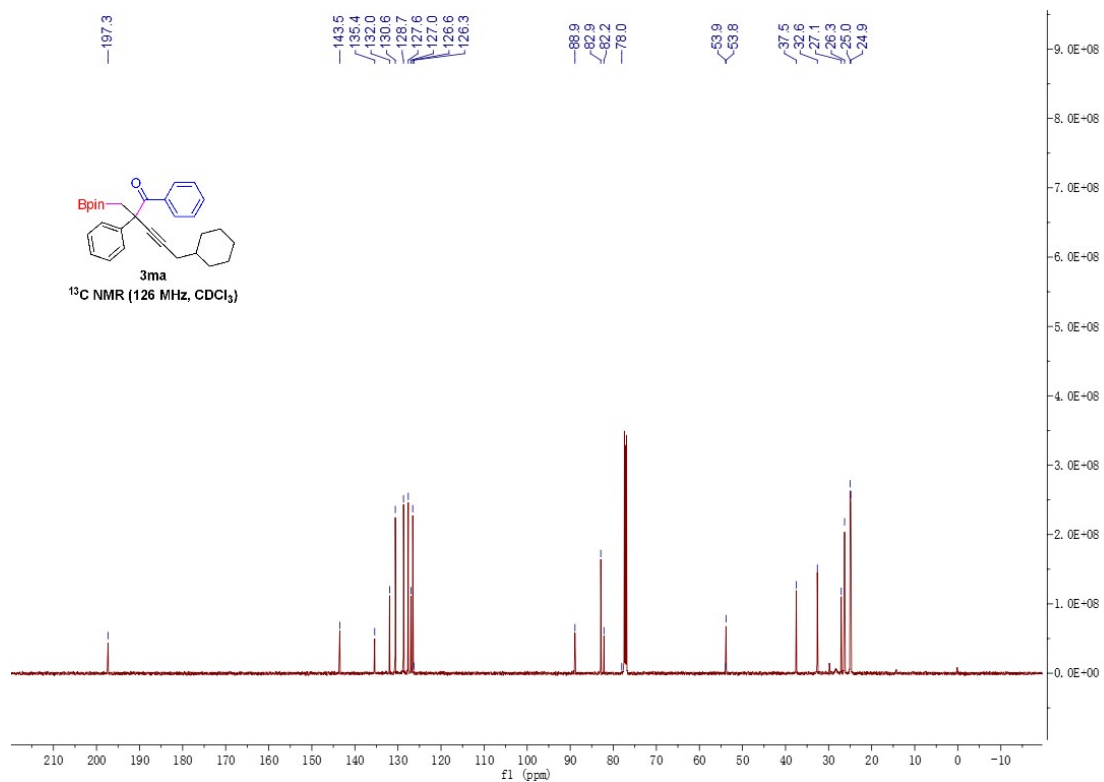

Figure S51. <sup>13</sup>C NMR (126 MHz, CDCl<sub>3</sub>) spectrum of **3ma**

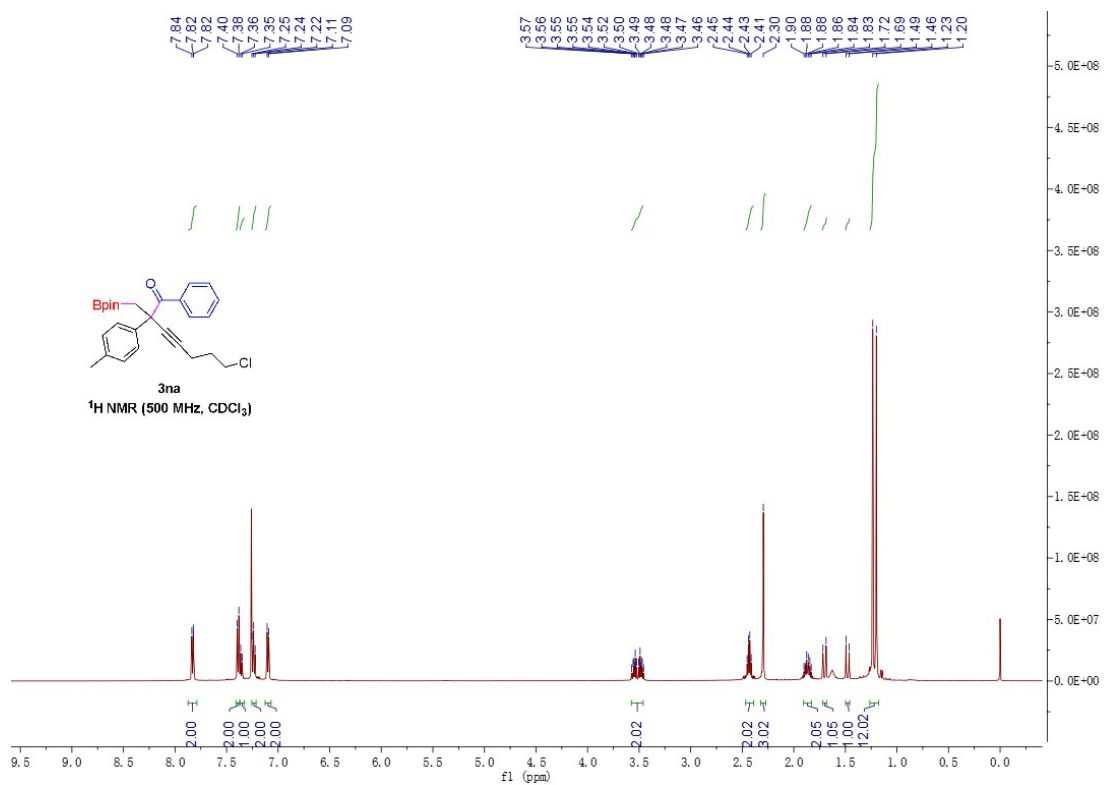

Figure S52. <sup>1</sup>H NMR (500 MHz, CDCl<sub>3</sub>) spectrum of **3na**

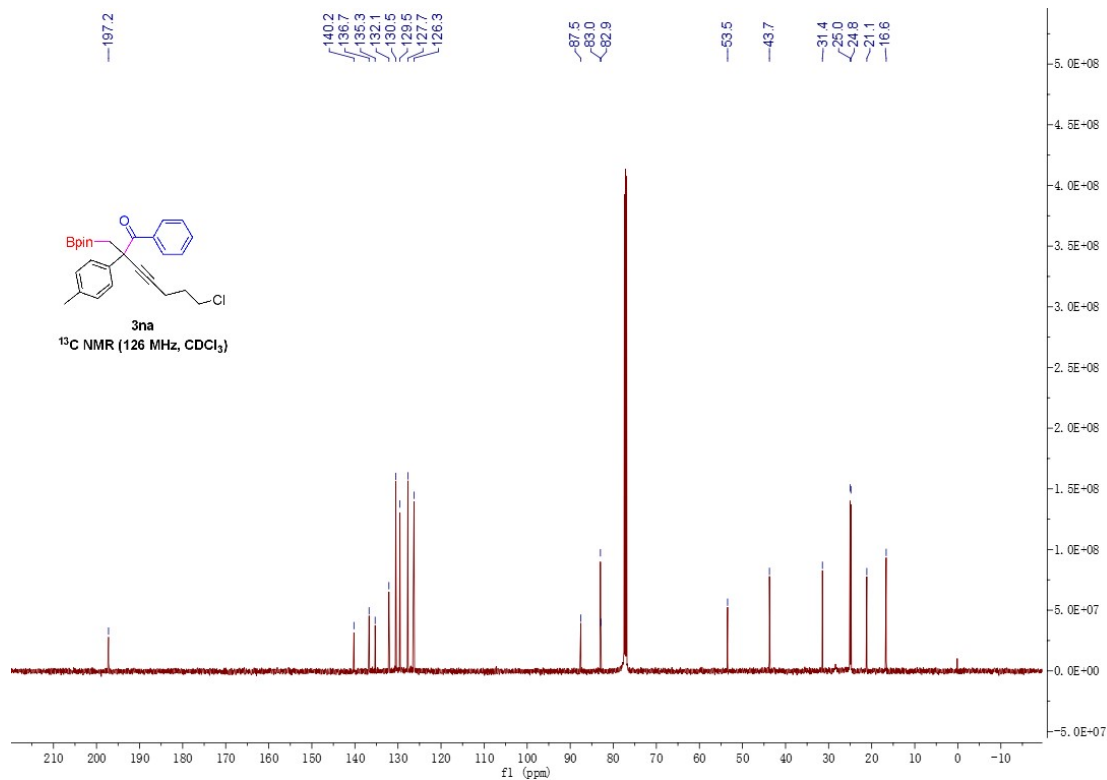

Figure S53. <sup>13</sup>C NMR (126 MHz, CDCl<sub>3</sub>) spectrum of 3na

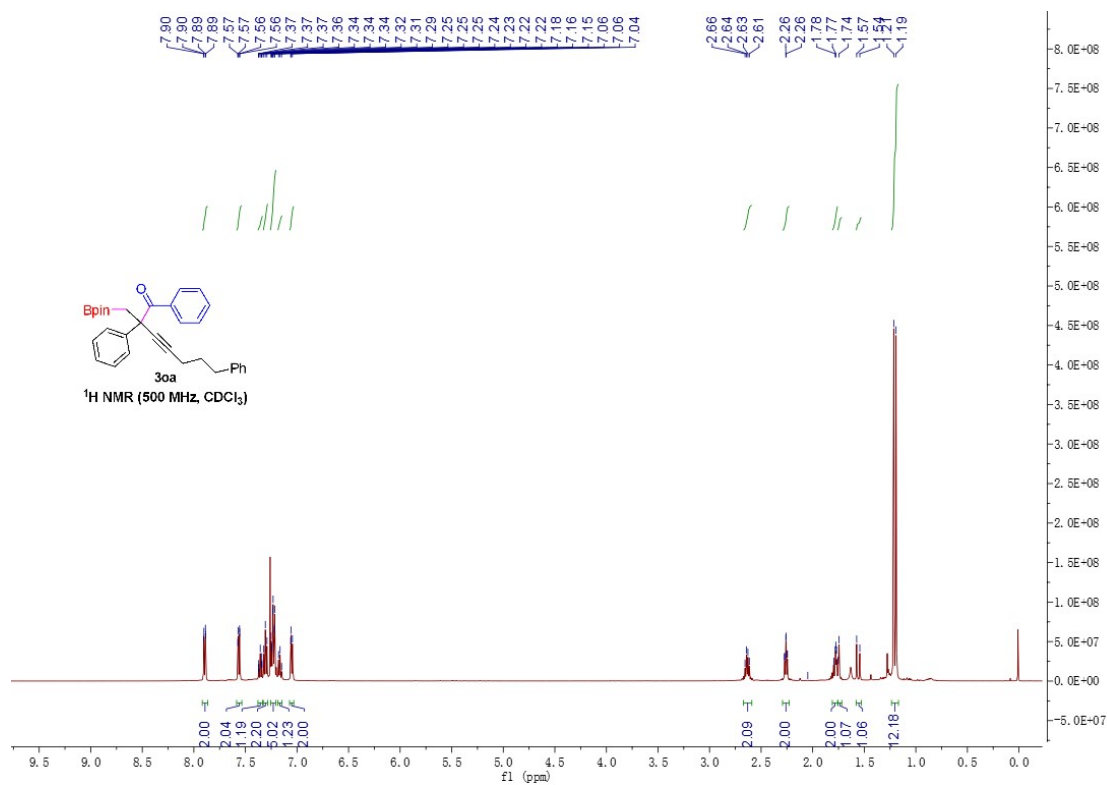

Figure S54. <sup>1</sup>H NMR (500 MHz, CDCl<sub>3</sub>) spectrum of 3oa

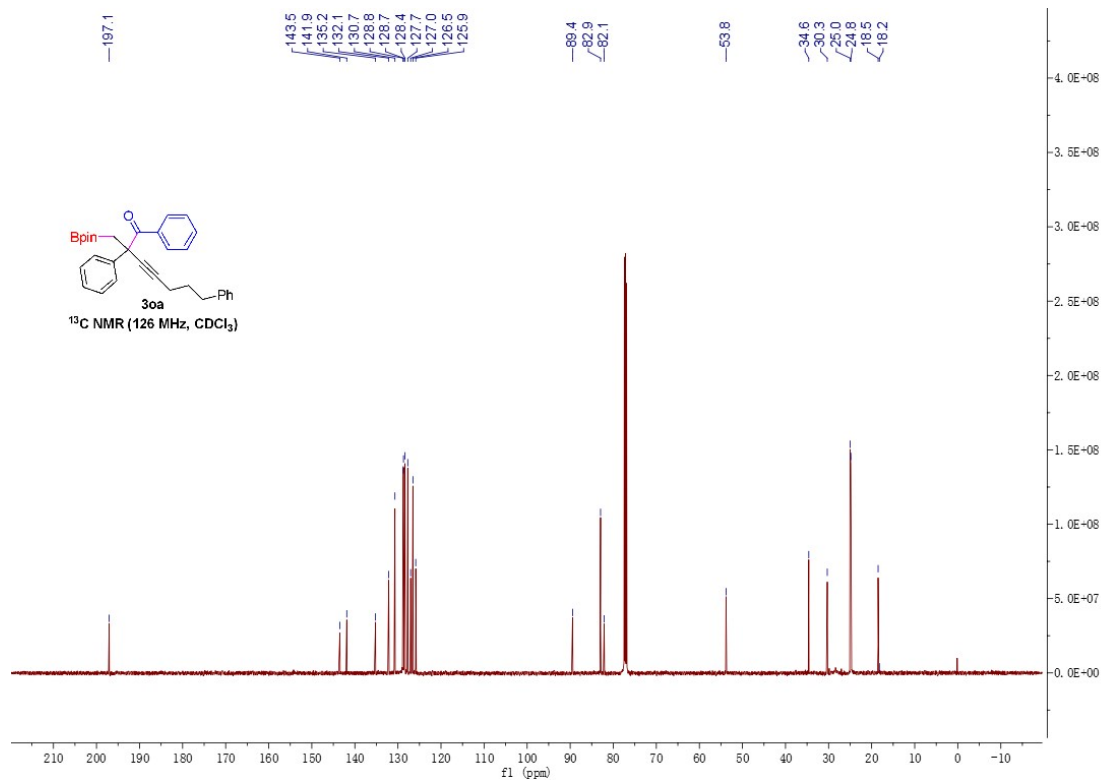

Figure S55.  $^{13}\text{C}$  NMR (126 MHz,  $\text{CDCl}_3$ ) spectrum of 30a

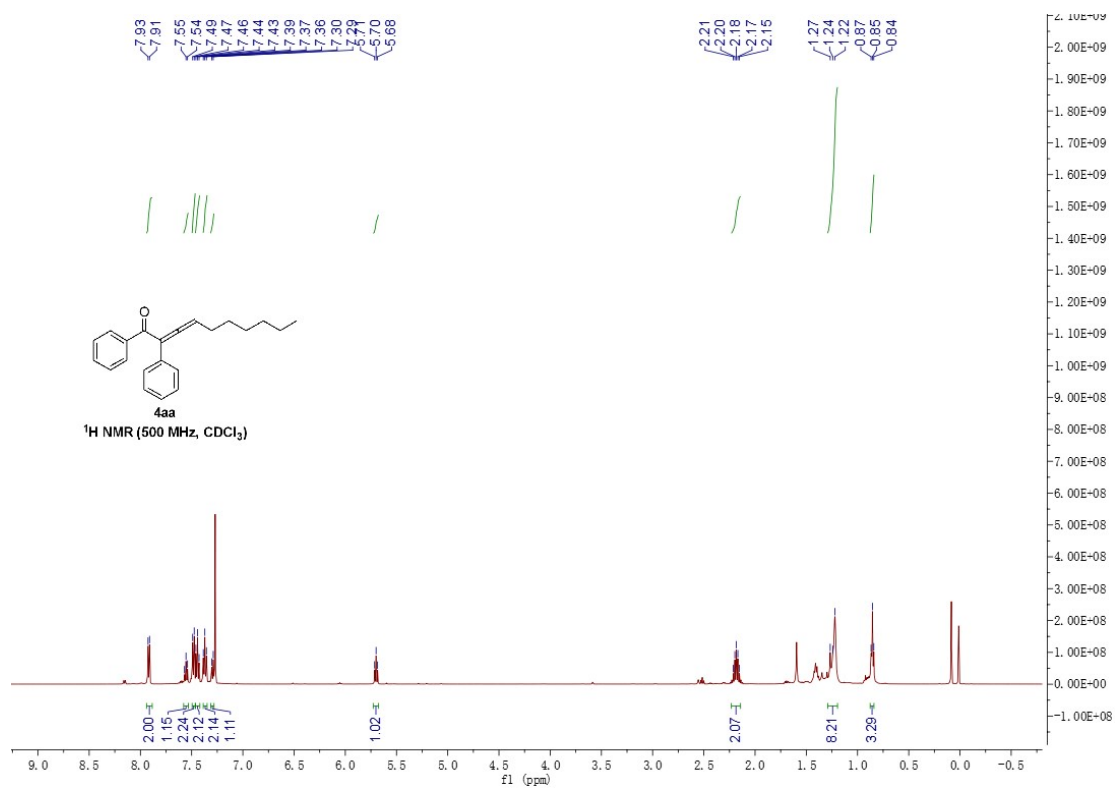

Figure S56.  $^1\text{H}$  NMR (500 MHz,  $\text{CDCl}_3$ ) spectrum of 4aa

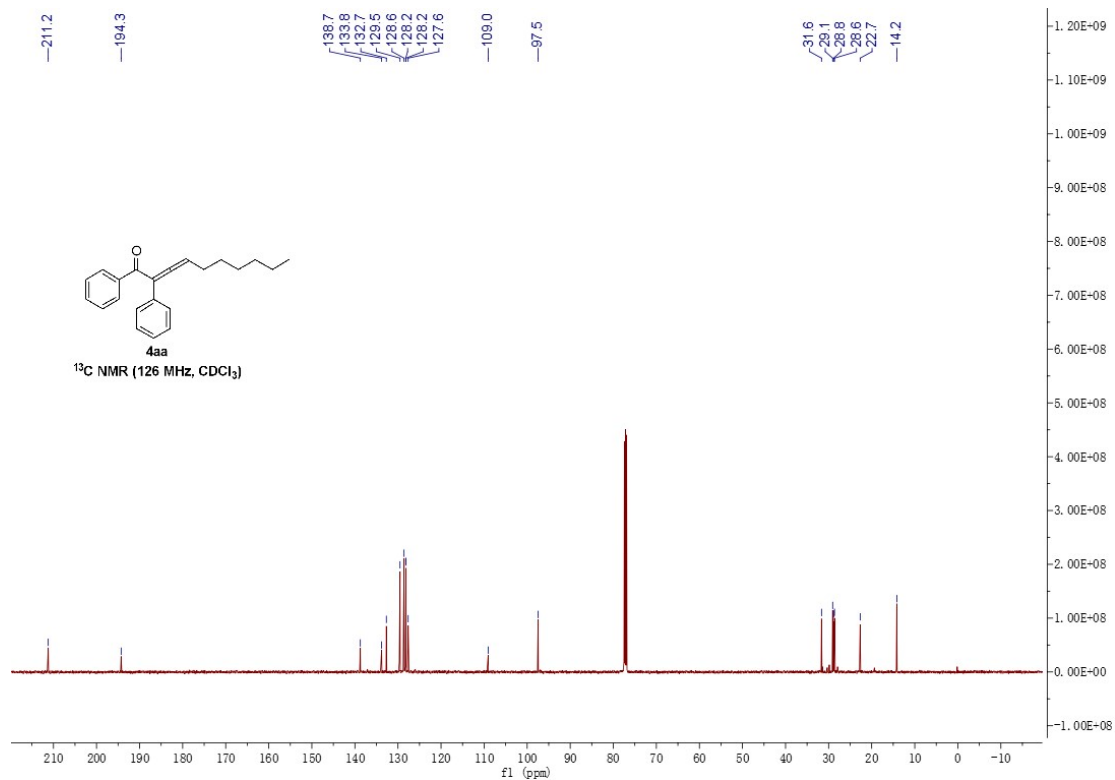

Figure S57. <sup>13</sup>C NMR (126 MHz, CDCl<sub>3</sub>) spectrum of 4aa

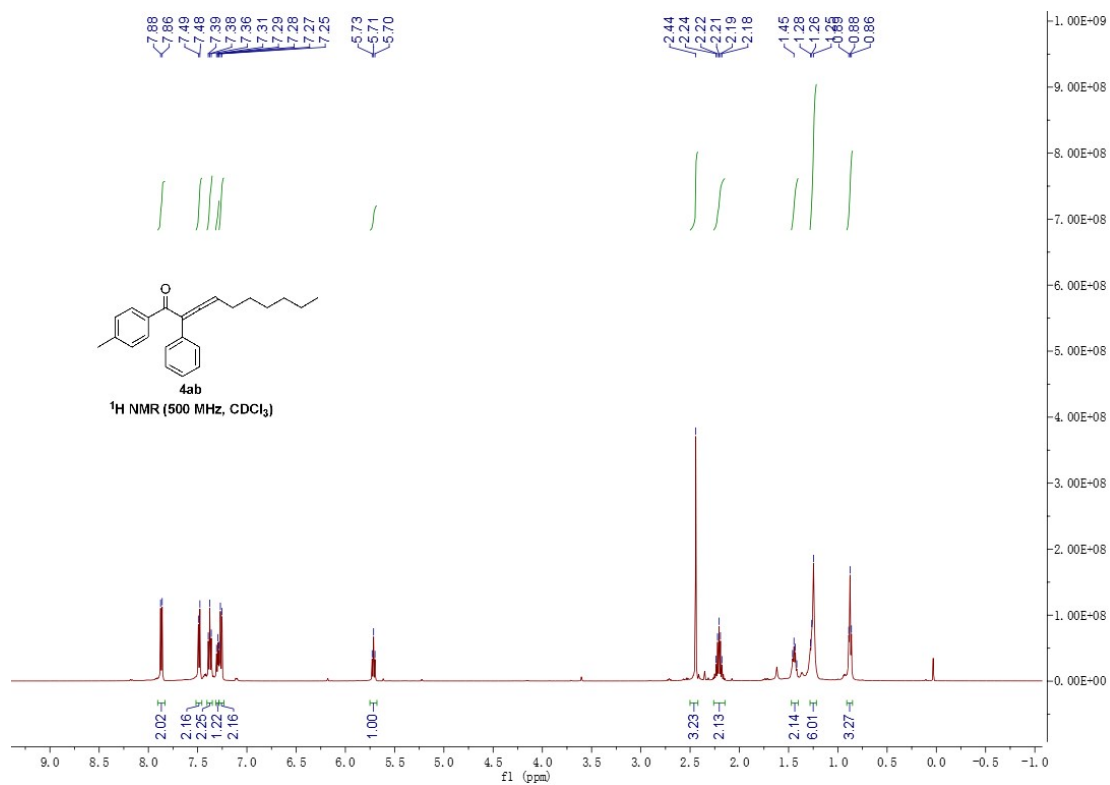

Figure S58. <sup>1</sup>H NMR (500 MHz, CDCl<sub>3</sub>) spectrum of 4ab

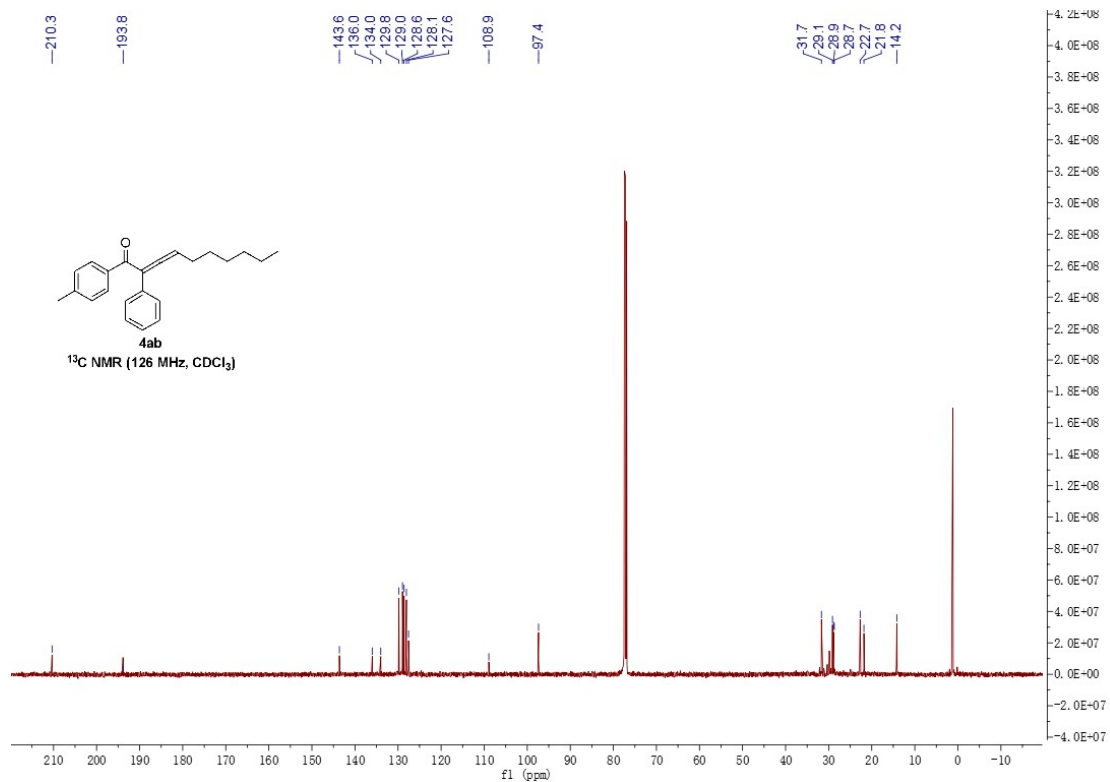

Figure S59. <sup>13</sup>C NMR (126 MHz, CDCl<sub>3</sub>) spectrum of **4ab**

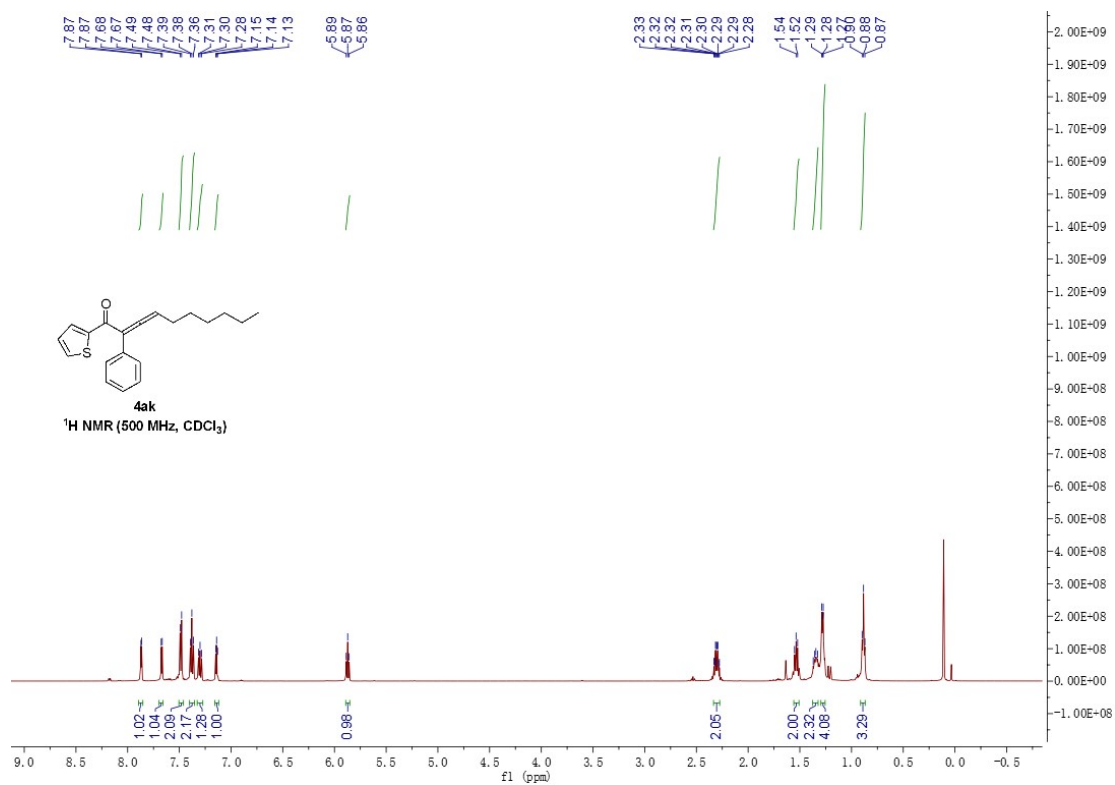

Figure S60. <sup>1</sup>H NMR (500 MHz, CDCl<sub>3</sub>) spectrum of **4ak**

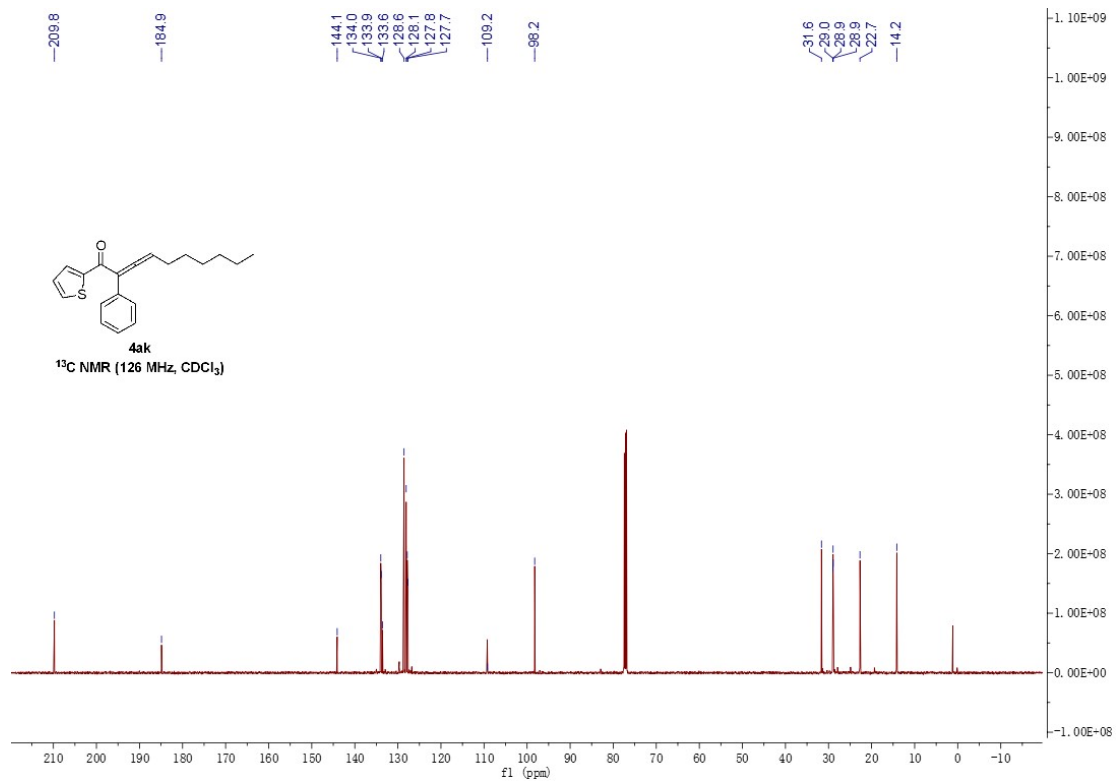

Figure S61. <sup>13</sup>C NMR (126 MHz, CDCl<sub>3</sub>) spectrum of 4ak

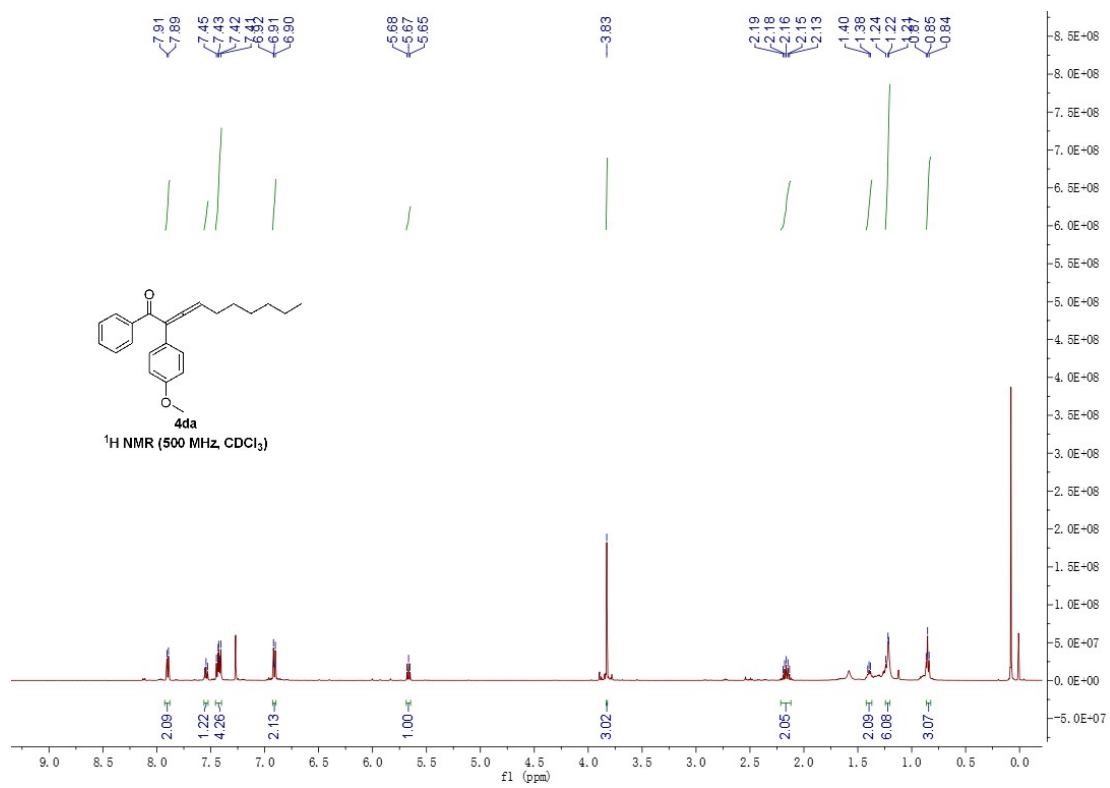

Figure S62. <sup>1</sup>H NMR (500 MHz, CDCl<sub>3</sub>) spectrum of 4da

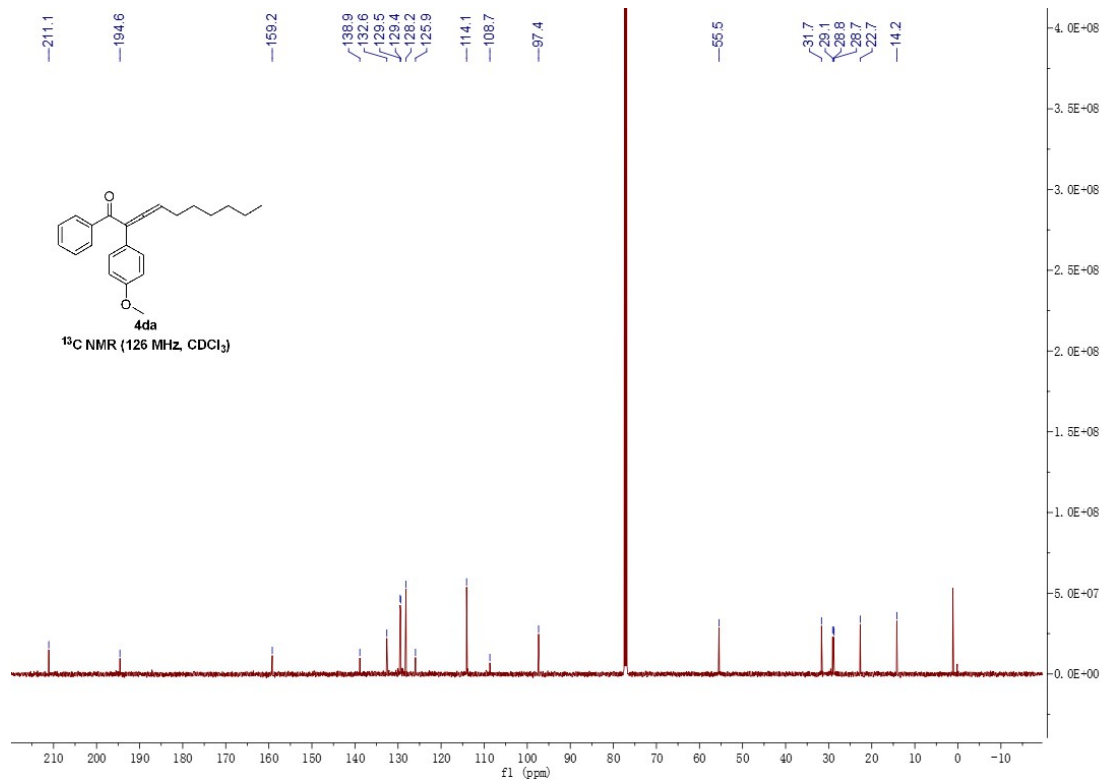

Figure S63. <sup>13</sup>C NMR (126 MHz, CDCl<sub>3</sub>) spectrum of 4da

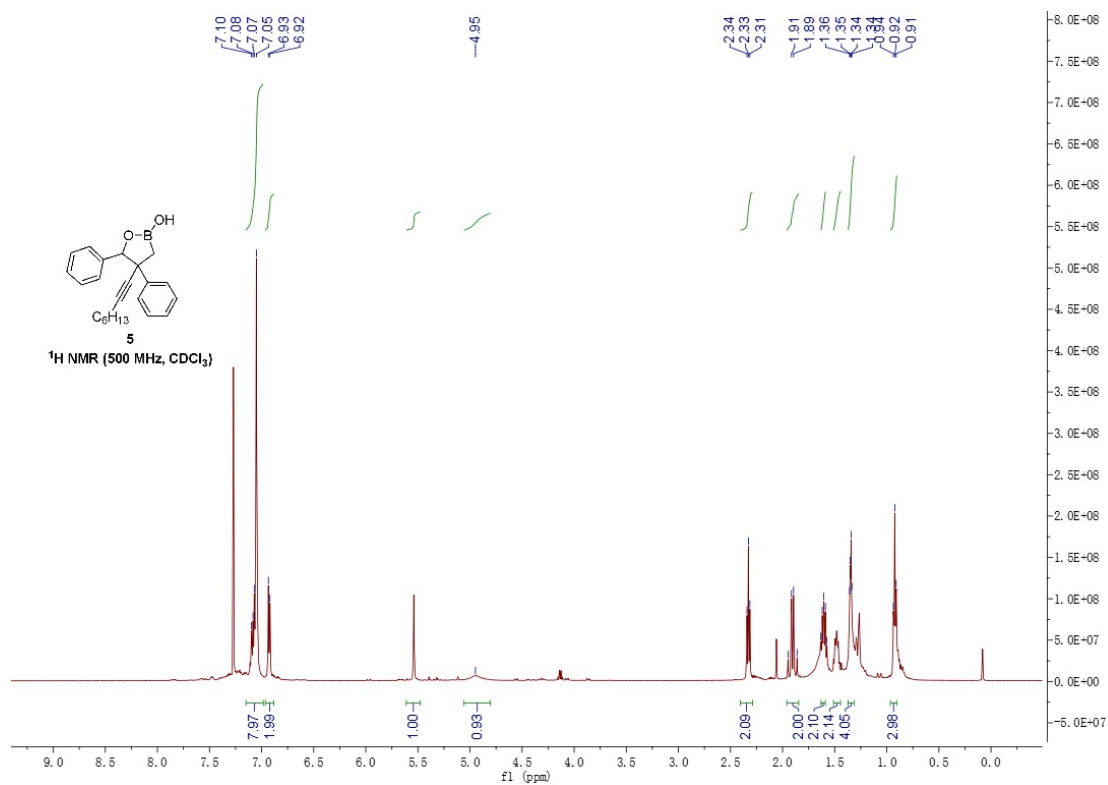

Figure S64. <sup>1</sup>H NMR (500 MHz, CDCl<sub>3</sub>) spectrum of 5

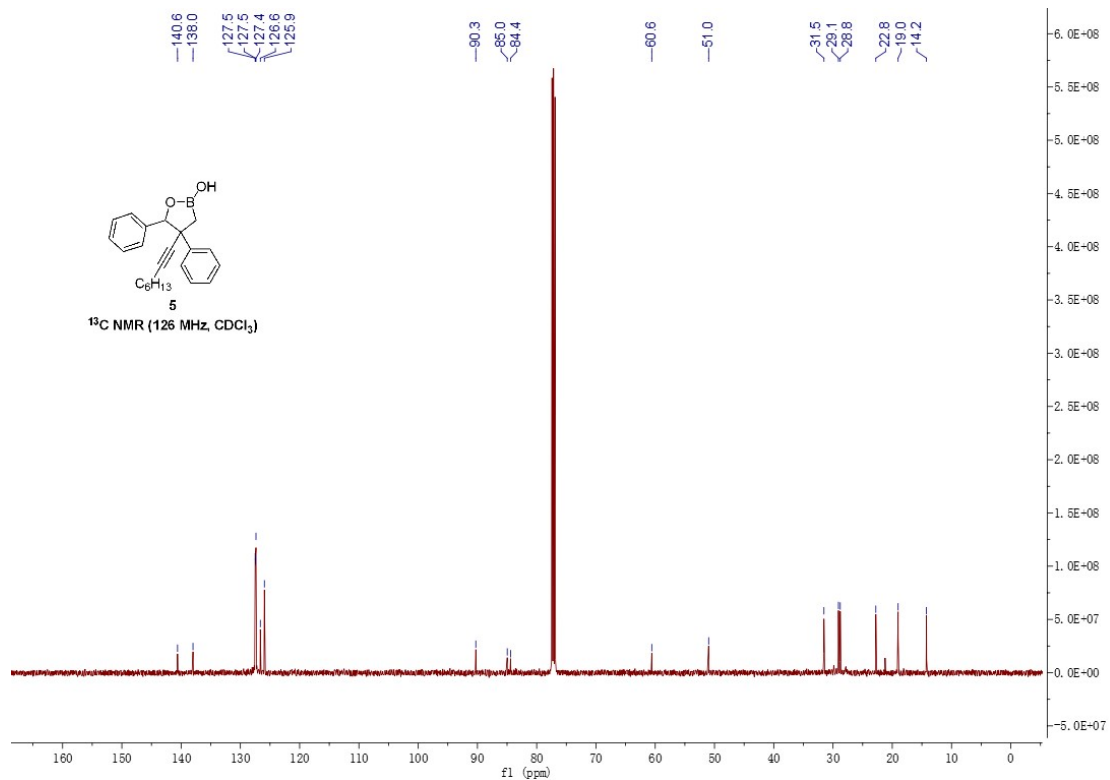

Figure S65. <sup>13</sup>C NMR (126 MHz, CDCl<sub>3</sub>) spectrum of **5**

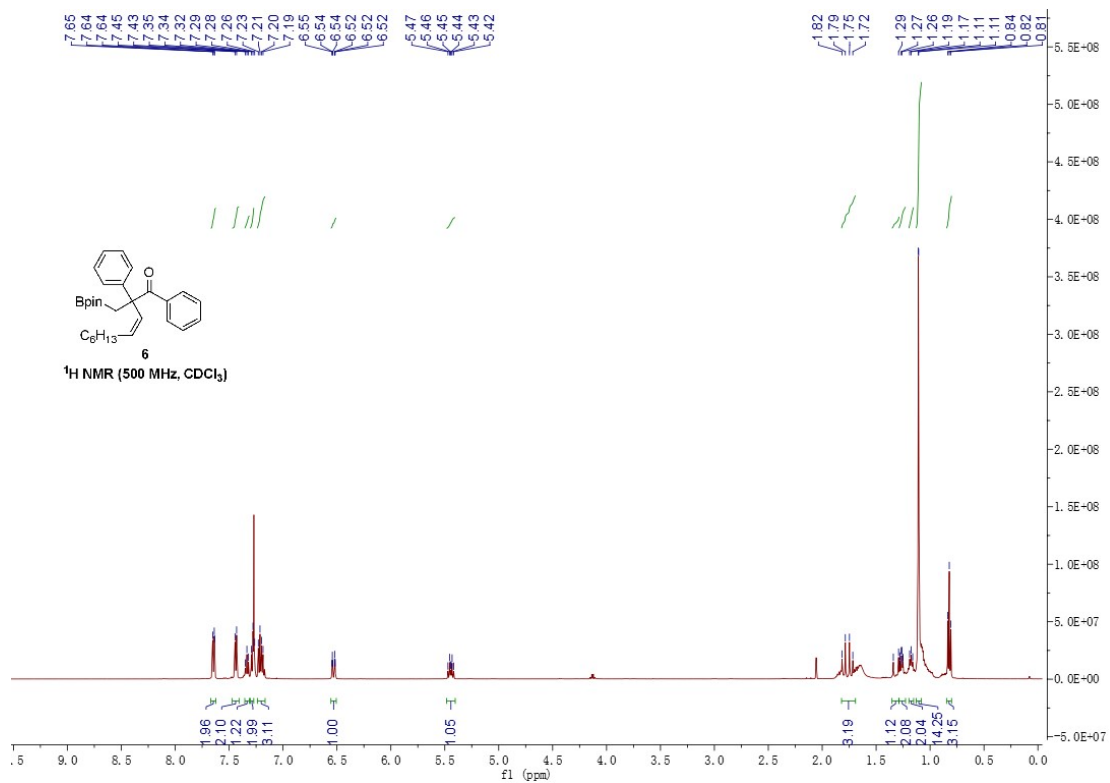

Figure S66. <sup>1</sup>H NMR (500 MHz, CDCl<sub>3</sub>) spectrum of **6**



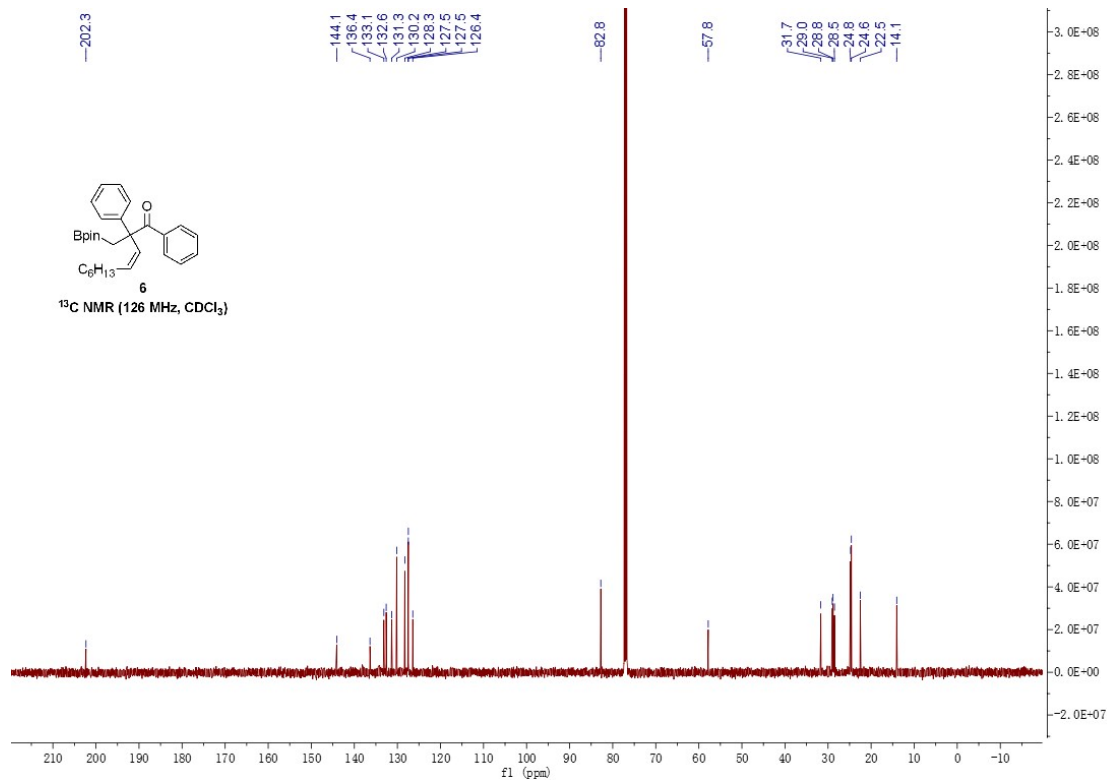

Figure S67. <sup>13</sup>C NMR (126 MHz, CDCl<sub>3</sub>) spectrum of **6**

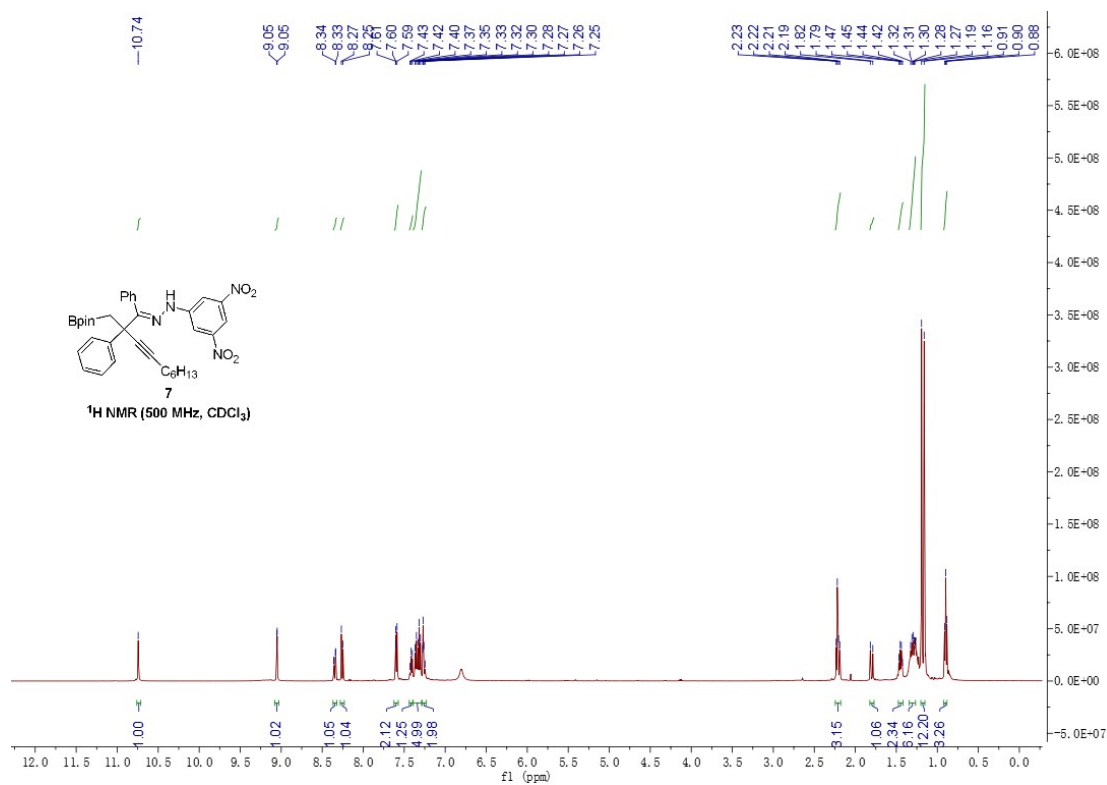

Figure S68. <sup>1</sup>H NMR (500 MHz, CDCl<sub>3</sub>) spectrum of **7**

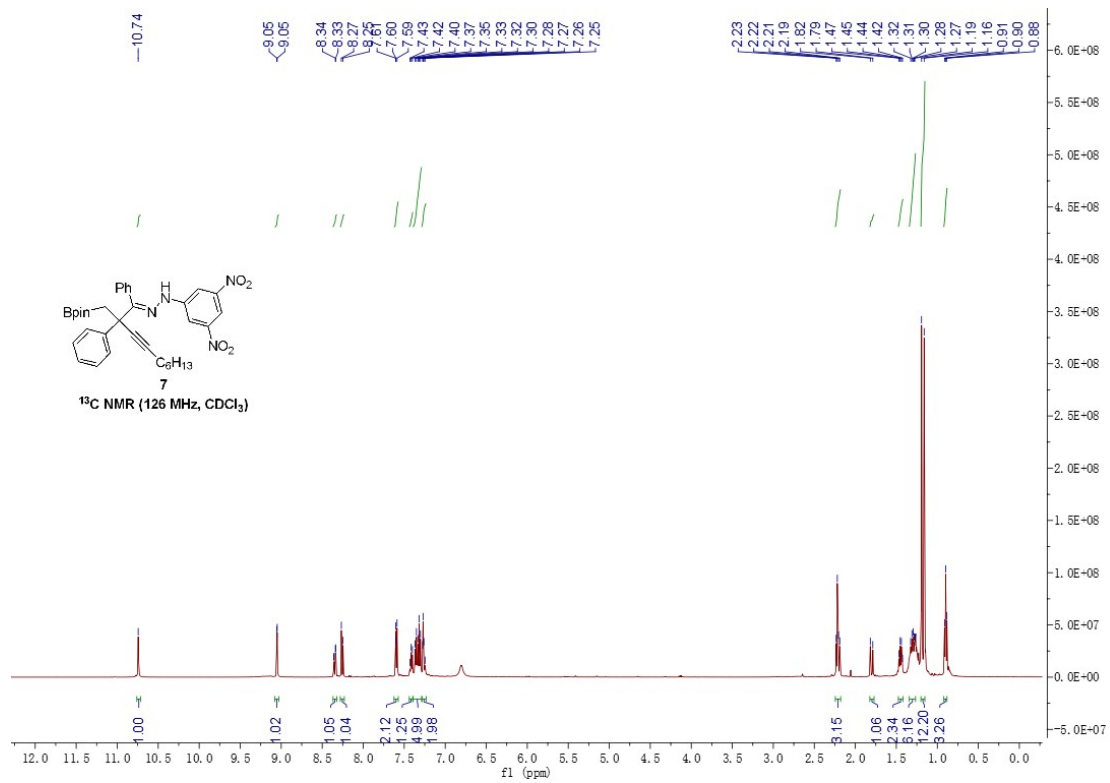

Figure S69. <sup>13</sup>C NMR (126 MHz, CDCl<sub>3</sub>) spectrum of **7**

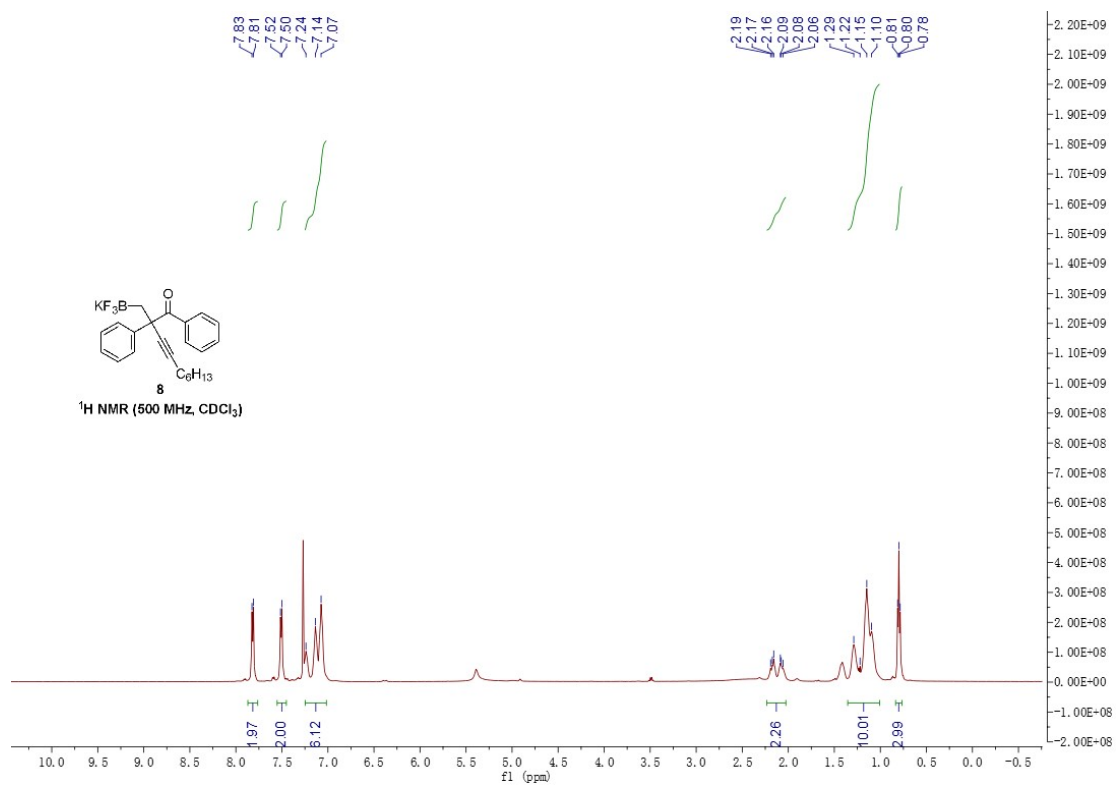

Figure S70. <sup>1</sup>H NMR (500 MHz, CDCl<sub>3</sub>) spectrum of **8**

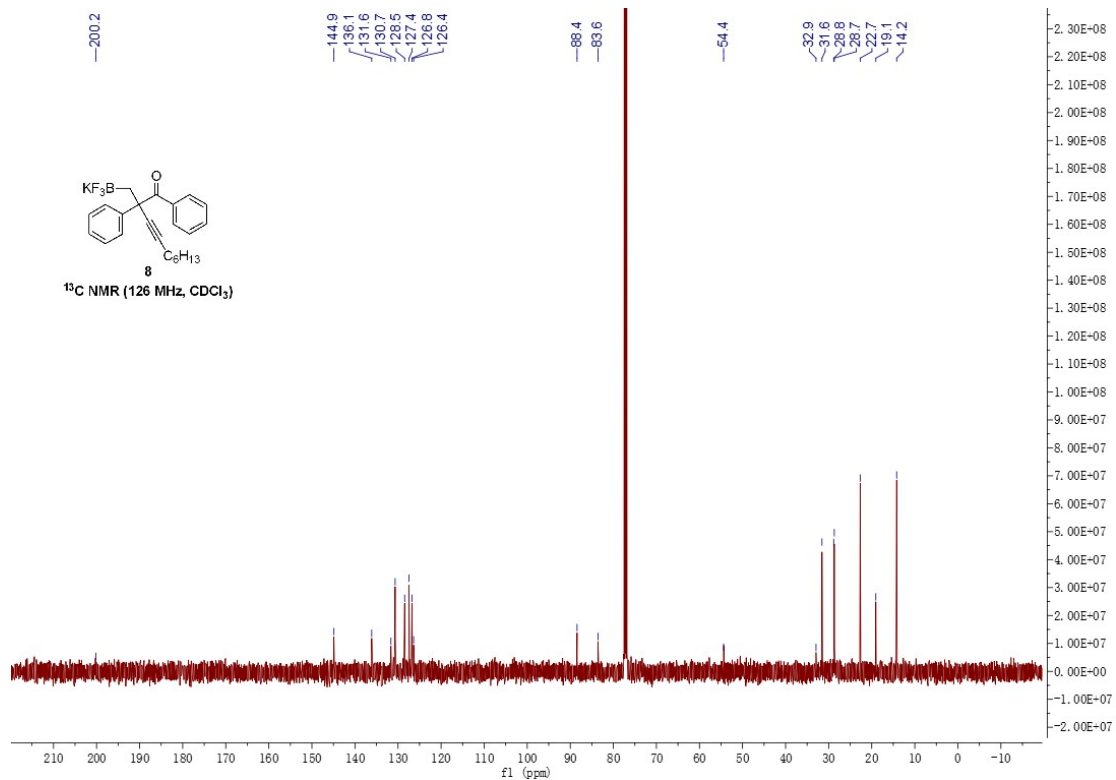

**Figure S71.** <sup>13</sup>C NMR (126 MHz, CDCl<sub>3</sub>) spectrum of **8**

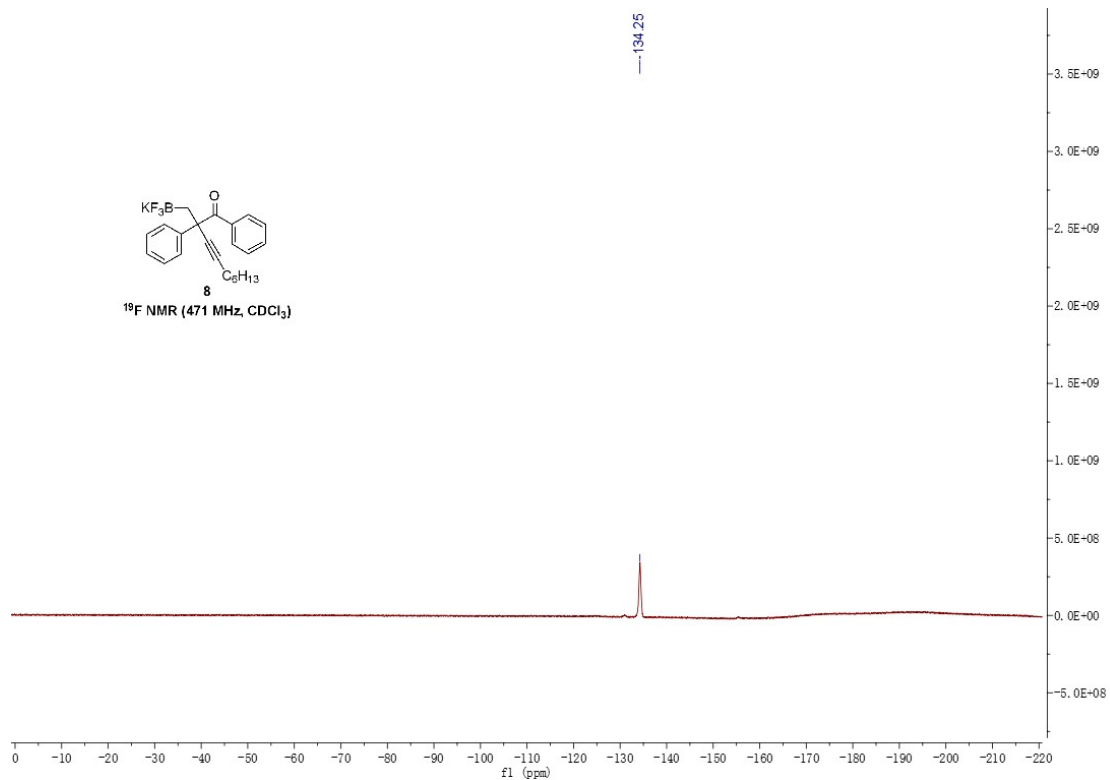

**Figure S72.** <sup>19</sup>F NMR (471 MHz, CDCl<sub>3</sub>) spectrum of **8**
